# Supplementary material
Source: publisher figshare collection journal article supplement (https://acs.figshare.com/ndownloader/files/3732604)
Supplement: Supplementary file 1 [file 3732604]

## Sheet: List1
Gene Name	Locus Identifier	Annotation	Fold Change (log2)
AT2G22170	AT2G22170	lipid-associated family protein	-6.31
AT1G05240	AT1G05240	[AT1G05250, peroxidase, putative];[AT1G05240, peroxidase, putative]	-5.74
AGP30	AT2G33790	pollen Ole e 1 allergen and extensin family protein	-5.72
BGLU35	AT1G51470	[AT1G47600, glycosyl hydrolase family 1 protein];[AT1G51470, glycosyl hydrolase family 1 protein]	-5.46
AT5G62340	AT5G62340	invertase/pectin methylesterase inhibitor family protein	-5.36
RHS13	AT4G02270	pollen Ole e 1 allergen and extensin family protein	-5.17
AGP14	AT5G56540	AGP14 (ARABINOGALACTAN PROTEIN 14)	-5.16
AT4G26010	AT4G26010	peroxidase, putative	-5.15
AT1G52050	AT1G52050	jacalin lectin family protein	-5.14
AT3G10720	AT3G10720	pectinesterase, putative	-5.12
DRT100	AT3G12610	DRT100 (DNA-DAMAGE REPAIR/TOLERATION 100); protein binding	-5.12
NIA1	AT1G77760	NIA1 (NITRATE REDUCTASE 1)	-5.08
AT3G29410	AT3G29410	terpene synthase/cyclase family protein	-5.01
AAP2	AT5G09220	AAP2 (AMINO ACID PERMEASE 2); amino acid transmembrane transporter	-4.99
GASA4	AT5G15230	GASA4 (GAST1 PROTEIN HOMOLOG 4)	-4.99
AT4G13580	AT4G13580	disease resistance-responsive family protein	-4.90
AT5G12940	AT5G12940	leucine-rich repeat family protein	-4.88
AGP7	AT5G65390	AGP7 (Arabinogalactan protein 7)	-4.76
AT5G45280	AT5G45280	pectinacetylesterase, putative	-4.74
XTH14	AT4G25820	XTR9 (XYLOGLUCAN ENDOTRANSGLYCOSYLASE 9); hydrolase, acting on glycosyl bonds	-4.71
AT1G52070	AT1G52070	jacalin lectin family protein	-4.69
AT1G76240	AT1G76240	similar to unknown protein [Arabidopsis thaliana] (TAIR:AT2G17080.1); similar to Os06g0725500 [Oryza sativa (japonica cultivar-group)] (GB:NP_001058623.1); similar to hypothetical protein OsI_023643 [Oryza sativa (indica cultivar-group)] (GB:EAZ02411.1); contains InterPro domain Protein of unknown function DUF241, plant (InterPro:IPR004320)	-4.69
AT5G60530	AT5G60530	late embryogenesis abundant protein-related / LEA protein-related	-4.68
AT1G19900	AT1G19900	glyoxal oxidase-related	-4.44
AT1G52820	AT1G52820	2-oxoglutarate-dependent dioxygenase, putative	-4.39
AT5G57625	AT5G57625	allergen V5/Tpx-1-related family protein	-4.38
ST4B	AT1G13420	sulfotransferase family protein	-4.34
AT1G30870	AT1G30870	cationic peroxidase, putative	-4.31
SKS6	AT1G41830	SKS6 (SKU5 Similar 6); pectinesterase	-4.29
AT2G18980	AT2G18980	peroxidase, putative	-4.26
XYL1	AT1G68560	ATXYL1/XYL1 (ALPHA-XYLOSIDASE 1); alpha-N-arabinofuranosidase/ hydrolase, hydrolyzing O-glycosyl compounds / xylan 1,4-beta-xylosidase	-4.26
AT2G36100	AT2G36100	integral membrane family protein	-4.25
AT4G33120	AT4G33120	[AT4G33110, coclaurine N-methyltransferase, putative];[AT4G33120, coclaurine N-methyltransferase, putative]	-4.23
AT5G42180	AT5G42180	peroxidase 64 (PER64) (P64) (PRXR4)	-4.19
NLM1	AT4G19030	NLM1 (NOD26-like intrinsic protein 1;1); water channel	-4.19
AT2G27370	AT2G27370	integral membrane family protein	-4.17
XCP1	AT4G35350	XCP1 (XYLEM CYSTEINE PEPTIDASE 1); cysteine-type peptidase	-4.09
PAR1	AT2G42870	HLH1/PAR1 (PHY RAPIDLY REGULATED 1); transcription regulator	-4.09
BGLU21	AT1G66270	beta-glucosidase (PSR3.2)	-4.08
AT1G80240	AT1G80240	similar to unknown protein [Arabidopsis thaliana] (TAIR:AT5G25460.1); similar to unnamed protein product [Vitis vinifera] (GB:CAO44183.1); contains InterPro domain Protein of unknown function DUF642 (InterPro:IPR006946)	-4.07
AT3G29250	AT3G29250	oxidoreductase	-4.03
AT5G01740	AT5G01740	similar to SAG20 (WOUND-INDUCED PROTEIN 12) [Arabidopsis thaliana] (TAIR:AT3G10985.1); similar to unnamed protein product [Vitis vinifera] (GB:CAO48816.1); contains InterPro domain Wound-induced protein, Wun1 (InterPro:IPR009798)	-4.00
AT5G60520	AT5G60520	late embryogenesis abundant protein-related / LEA protein-related	-4.00
AT3G16180	AT3G16180	proton-dependent oligopeptide transport (POT) family protein	-3.99
AT2G39430	AT2G39430	disease resistance-responsive protein-related / dirigent protein-related	-3.99
AT5G19340	AT5G19340	similar to unknown protein [Arabidopsis thaliana] (TAIR:AT3G05980.1); similar to hypothetical protein [Vitis vinifera] (GB:CAN75979.1)	-3.97
PME2	AT1G53830	ATPME2 (Arabidopsis thaliana pectin methylesterase 2)	-3.97
FLA9	AT1G03870	FLA9	-3.97
AT5G14690	AT5G14690	similar to unknown protein [Arabidopsis thaliana] (TAIR:AT3G01516.1); similar to unnamed protein product [Vitis vinifera] (GB:CAO14758.1)	-3.96
AT3G54600	AT3G54600	DJ-1 family protein	-3.95
BCCP2	AT5G15530	BCCP2 (biotin carboxyl carrier protein 2); biotin binding	-3.93
GATA2	AT2G45050	zinc finger (GATA type) family protein	-3.92
AT4G12545	AT4G12545	protease inhibitor/seed storage/lipid transfer protein (LTP) family protein	-3.89
AT1G56680	AT1G56680	glycoside hydrolase family 19 protein	-3.89
AGP3	AT4G40090	AGP3 (ARABINOGALACTAN-PROTEIN 3)	-3.87
AT3G55230	AT3G55230	disease resistance-responsive family protein	-3.86
CYP83A1	AT4G13770	CYP83A1 (CYTOCHROME P450 83A1); oxygen binding	-3.85
AT3G24020	AT3G24020	disease resistance-responsive family protein	-3.83
AT1G14220	AT1G14220	ribonuclease T2 family protein	-3.83
AT3G53980	AT3G53980	protease inhibitor/seed storage/lipid transfer protein (LTP) family protein	-3.82
AT3G09925	AT3G09925	pollen Ole e 1 allergen and extensin family protein	-3.81
CLE6	AT2G31085	CLE6 (CLAVATA3/ESR-RELATED 6); receptor binding	-3.79
TED6	AT1G43790	similar to hydroxyproline-rich glycoprotein family protein [Arabidopsis thaliana] (TAIR:AT5G48920.1); similar to hypothetical protein [Vitis vinifera] (GB:CAN71192.1)	-3.78
UNE11	AT4G00080	UNE11 (unfertilized embryo sac 11); pectinesterase inhibitor	-3.76
AT3G11550	AT3G11550	integral membrane family protein	-3.76
LAC3	AT2G30210	LAC3 (laccase 3); copper ion binding / oxidoreductase	-3.76
AT3G62280	AT3G62280	carboxylesterase	-3.76
AT4G11320	AT4G11320	cysteine proteinase, putative	-3.75
FIB2	AT4G25630	FIB2 (FIBRILLARIN 2)	-3.73
AT5G14150	AT5G14150	similar to unknown protein [Arabidopsis thaliana] (TAIR:AT5G11420.1); similar to hypothetical protein [Vitis vinifera] (GB:CAN70048.1); contains InterPro domain Protein of unknown function DUF642 (InterPro:IPR006946)	-3.73
MLP328	AT2G01520	MLP328 (MLP-LIKE PROTEIN 328)	-3.72
AT5G20950	AT5G20950	glycosyl hydrolase family 3 protein	-3.72
LTP5	AT3G51600	LTP5 (LIPID TRANSFER PROTEIN 5); lipid transporter	-3.72
HSD4	AT5G50590	[AT5G50690, ATHSD7 (HYDROXYSTEROID DEHYDROGENASE 7); oxidoreductase];[AT5G50590, ATHSD4 (HYDROXYSTEROID DEHYDROGENASE 4); oxidoreductase]	-3.70
GMD1	AT5G66280	GMD1 (GDP-D-MANNOSE 4,6-DEHYDRATASE 1); GDP-mannose 4,6-dehydratase	-3.68
FLA11	AT5G03170	FLA11 (fasciclin-like arabinogalactan-protein 11)	-3.67
AT1G49030	AT1G49030	similar to unknown protein [Arabidopsis thaliana] (TAIR:AT3G18460.1); similar to unnamed protein product [Vitis vinifera] (GB:CAO68031.1); contains InterPro domain Protein of unknown function Cys-rich (InterPro:IPR006461)	-3.66
FLA13	AT5G44130	FLA13 (FASCICLIN-LIKE ARABINOGALACTAN PROTEIN 13 PRECURSOR)	-3.66
AT3G45700	AT3G45700	proton-dependent oligopeptide transport (POT) family protein	-3.65
AT3G59370	AT3G59370	contains domain PTHR22683 (PTHR22683)	-3.65
XTH8	AT1G11545	xyloglucan:xyloglucosyl transferase, putative / xyloglucan endotransglycosylase, putative / endo-xyloglucan transferase, putative	-3.61
HTA6	AT5G59870	HTA6; DNA binding	-3.60
AT1G62510	AT1G62510	protease inhibitor/seed storage/lipid transfer protein (LTP) family protein	-3.57
CPuORF32	AT1G73602	[AT1G73602, CPuORF32 (Conserved peptide upstream open reading frame 32)];[AT1G73600, phosphoethanolamine N-methyltransferase]	-3.57
AT3G19430	AT3G19430	late embryogenesis abundant protein-related / LEA protein-related	-3.57
AT4G22212	AT4G22212	Encodes a defensin-like (DEFL) family protein.	-3.55
CTL2	AT3G16920	chitinase	-3.55
AT3G20360	AT3G20360	meprin and TRAF homology domain-containing protein / MATH domain-containing protein	-3.54
PEP7	AT5G09978	PEP7 (ELICITOR PEPTIDE 7 PRECURSOR)	-3.53
AT1G09750	AT1G09750	chloroplast nucleoid DNA-binding protein-related	-3.52
IMD1	AT5G14200	3-isopropylmalate dehydrogenase, chloroplast, putative	-3.52
AT1G44970	AT1G44970	peroxidase, putative	-3.51
AT2G28790	AT2G28790	osmotin-like protein, putative	-3.51
AT4G28650	AT4G28650	leucine-rich repeat transmembrane protein kinase, putative	-3.50
TBL39	AT2G42570	similar to unknown protein [Arabidopsis thaliana] (TAIR:AT2G31110.2); similar to unknown [Pisum sativum] (GB:ABA29158.1); contains InterPro domain Protein of unknown function DUF231, plant (InterPro:IPR004253)	-3.50
SHV2	AT5G49270	COBL9/MRH4/SHV2 (COBRA-LIKE 9, SHAVEN 2); carbohydrate binding	-3.49
RCI2B	AT3G05890	RCI2B (RARE-COLD-INDUCIBLE 2B)	-3.45
AT5G26200	AT5G26200	mitochondrial substrate carrier family protein	-3.45
AT5G44020	AT5G44020	[AT1G04030, similar to unknown protein [Arabidopsis thaliana] (TAIR:AT5G44040.1); similar to unnamed protein product [Vitis vinifera] (GB:CAO40580.1)];[AT1G04040, acid phosphatase class B family protein];[AT5G44020, acid phosphatase class B family protein]	-3.45
AT1G77530	AT1G77530	O-methyltransferase family 2 protein	-3.45
TUB1	AT1G75780	TUB1 (tubulin beta-1 chain); structural molecule	-3.44
AT1G73620	AT1G73620	thaumatin-like protein, putative / pathogenesis-related protein, putative	-3.44
AT3G18450	AT3G18450	similar to unknown protein [Arabidopsis thaliana] (TAIR:AT3G18460.1); similar to unnamed protein product [Vitis vinifera] (GB:CAO68031.1); contains InterPro domain Protein of unknown function Cys-rich (InterPro:IPR006461)	-3.44
AT4G12510	AT4G12510	[AT4G12510, protease inhibitor/seed storage/lipid transfer protein (LTP) family protein];[AT4G12520, protease inhibitor/seed storage/lipid transfer protein (LTP) family protein]	-3.44
COW1	AT4G34580	transporter	-3.43
XTH16	AT3G23730	xyloglucan:xyloglucosyl transferase, putative / xyloglucan endotransglycosylase, putative / endo-xyloglucan transferase, putative	-3.40
HTA11	AT3G54560	HTA11; DNA binding	-3.39
NSP4	AT3G16410	jacalin lectin family protein	-3.38
GRP4	AT3G23830	GR-RBP4/GRP4 (GLYCINE-RICH RNA-BINDING PROTEIN 4); RNA binding / double-stranded DNA binding / single-stranded DNA binding	-3.38
AT1G75710	AT1G75710	zinc finger (C2H2 type) family protein	-3.38
SSL2	AT2G41290	strictosidine synthase family protein	-3.37
GH9B7	AT1G75680	ATGH9B7 (ARABIDOPSIS THALIANA GLYCOSYL HYDROLASE 9B7); hydrolase, hydrolyzing O-glycosyl compounds	-3.36
GRH1	AT4G03190	GRH1 (GRR1-LIKE PROTEIN 1); ubiquitin-protein ligase	-3.36
AT1G23750	AT1G23750	DNA-binding protein-related	-3.35
CYP81F4	AT4G37410	[AT4G37409, unknown protein];[AT4G37410, CYP81F4 (cytochrome P450, family 81, subfamily F, polypeptide 4); oxygen binding]	-3.35
AT5G24070	AT5G24070	peroxidase family protein	-3.33
AT1G71740	AT1G71740	similar to unknown protein [Arabidopsis thaliana] (TAIR:AT3G18560.1); similar to hypothetical protein [Vitis vinifera] (GB:CAN60388.1)	-3.32
MSL9	AT5G19520	mechanosensitive ion channel domain-containing protein / MS ion channel domain-containing protein	-3.32
XCP2	AT1G20850	XCP2 (XYLEM CYSTEINE PEPTIDASE 2); cysteine-type peptidase/ peptidase	-3.31
AT3G27200	AT3G27200	Cupredoxin superfamily protein	-3.31
AT5G58750	AT5G58750	wound-responsive protein-related	-3.31
ROC1	AT4G38740	ROC1 (rotamase CyP 1); peptidyl-prolyl cis-trans isomerase	-3.31
AT1G67330	AT1G67330	[AT1G67328, other RNA];[AT1G67330, similar to unknown protein [Arabidopsis thaliana] (TAIR:AT1G27930.1); similar to unknown [Populus trichocarpa] (GB:ABK93495.1); contains InterPro domain Protein of unknown function DUF579, plant (InterPro:IPR006514)]	-3.31
AT5G46890	AT5G46890	protease inhibitor/seed storage/lipid transfer protein (LTP) family protein	-3.30
DMP2	AT3G21550	similar to unknown protein [Arabidopsis thaliana] (TAIR:AT3G21520.1); similar to unnamed protein product [Vitis vinifera] (GB:CAO71058.1); contains InterPro domain Protein of unknown function DUF679 (InterPro:IPR007770)	-3.30
AT4G22230	AT4G22230	Encodes a defensin-like (DEFL) family protein.	-3.29
AT2G05790	AT2G05790	glycosyl hydrolase family 17 protein	-3.27
RSL2	AT4G33880	basic helix-loop-helix (bHLH) family protein	-3.27
sks4	AT4G22010	SKS4 (SKU5 Similar 4); copper ion binding / oxidoreductase	-3.26
AT3G57010	AT3G57010	strictosidine synthase family protein	-3.26
AT2G28670	AT2G28670	[AT2G28670, disease resistance-responsive family protein / fibroin-related];[AT2G28671, contains domain PRICHEXTENSN (PR01217)]	-3.26
AIR3	AT2G04160	AIR3 (Auxin-Induced in Root cultures 3); subtilase	-3.26
XTH18	AT4G30280	ATXTH18/XTH18 (XYLOGLUCAN ENDOTRANSGLUCOSYLASE/HYDROLASE 18); hydrolase, acting on glycosyl bonds	-3.25
ELP	AT1G12090	ELP (EXTENSIN-LIKE PROTEIN); lipid binding	-3.24
AT2G20515	AT2G20515	similar to unnamed protein product [Vitis vinifera] (GB:CAO40634.1)	-3.24
AT5G48900	AT5G48900	pectate lyase family protein	-3.24
AT5G24100	AT5G24100	leucine-rich repeat transmembrane protein kinase, putative	-3.24
CYP79B2	AT4G39950	CYP79B2 (cytochrome P450, family 79, subfamily B, polypeptide 2); oxygen binding	-3.24
SKU5	AT4G12420	SKU5 (skewed 5); copper ion binding	-3.22
AT1G02810	AT1G02810	pectinesterase family protein	-3.21
AT4G11210	AT4G11210	disease resistance-responsive family protein / dirigent family protein	-3.20
GSTU14	AT1G27140	ATGSTU14 (GLUTATHIONE S-TRANSFERASE 13); glutathione transferase	-3.20
AT4G15160	AT4G15160	protease inhibitor/seed storage/lipid transfer protein (LTP) family protein	-3.19
BXL2	AT1G02640	BXL2 (BETA-XYLOSIDASE 2); hydrolase, hydrolyzing O-glycosyl compounds	-3.19
AT1G51850	AT1G51850	leucine-rich repeat protein kinase, putative	-3.19
LAC11	AT5G03260	LAC11 (laccase 11); copper ion binding / oxidoreductase	-3.19
AT3G50640	AT3G50640	similar to unknown protein [Arabidopsis thaliana] (TAIR:AT5G66800.1); similar to hypothetical protein [Vitis vinifera] (GB:CAN61148.1)	-3.19
PRL	AT4G02060	PRL (PROLIFERA); ATP binding / DNA binding / DNA-dependent ATPase	-3.19
AT1G77330	AT1G77330	1-aminocyclopropane-1-carboxylate oxidase, putative / ACC oxidase, putative	-3.19
AT5G05500	AT5G05500	pollen Ole e 1 allergen and extensin family protein	-3.18
AT4G25260	AT4G25260	invertase/pectin methylesterase inhibitor family protein	-3.18
AT1G21440	AT1G21440	mutase family protein	-3.17
AT1G30750	AT1G30750	similar to Hypothetical protein CBG24759 [Caenorhabditis briggsae] (GB:CAE56916.1); contains InterPro domain Protein of unknown function DUF1720 (InterPro:IPR013182)	-3.17
AT4G30660	AT4G30660	hydrophobic protein, putative / low temperature and salt responsive protein, putative	-3.17
AT5G40590	AT5G40590	DC1 domain-containing protein	-3.16
AT5G03995	AT5G03995	unknown protein	-3.16
AT4G17390	AT4G17390	60S ribosomal protein L15 (RPL15B)	-3.15
MYB34	AT5G60890	ATMYB34/ATR1/MYB34 (ALTERED TRYPTOPHAN REGULATION, MYB DOMAIN PROTEIN 34); DNA binding / kinase/ transcription activator/ transcription factor	-3.15
AGP4	AT5G10430	AGP4 (ARABINOGALACTAN-PROTEIN 4)	-3.14
AT1G15540	AT1G15540	oxidoreductase, 2OG-Fe(II) oxygenase family protein	-3.13
IPMI2	AT2G43100	aconitase C-terminal domain-containing protein	-3.12
AT1G09200	AT1G09200	histone H3	-3.12
DELTA-TIP	AT3G16240	DELTA-TIP (delta tonoplast integral protein); water channel	-3.12
TIP4;1	AT2G25810	TIP4;1 (tonoplast intrinsic protein 4;1); water channel	-3.11
AGP26	AT2G47930	AGP26/ATAGP26 (ARABINOGALACTAN PROTEINS 26)	-3.11
CB5-C	AT2G46650	B5 #1 (cytochrome b5 family protein #1); heme binding / transition metal ion binding	-3.11
AGP22	AT5G53250	AGP22/ATAGP22 (ARABINOGALACTAN PROTEINS 22)	-3.10
AT1G50060	AT1G50060	pathogenesis-related protein, putative	-3.10
COBL5	AT5G60950	COBL5 (COBRA-LIKE PROTEIN 5 PRECURSOR)	-3.09
AT5G07030	AT5G07030	pepsin A	-3.09
GSTU26	AT1G17190	ATGSTU26 (Arabidopsis thaliana Glutathione S-transferase (class tau) 26); glutathione transferase	-3.08
AT5G01870	AT5G01870	lipid transfer protein, putative	-3.08
MLO4	AT1G11000	MLO4 (MILDEW RESISTANCE LOCUS O 4); calmodulin binding	-3.07
ENODL17	AT5G15350	plastocyanin-like domain-containing protein	-3.07
AT1G16000	AT1G16000	similar to unknown protein [Arabidopsis thaliana] (TAIR:AT1G80890.1); similar to Os12g0556400 [Oryza sativa (japonica cultivar-group)] (GB:NP_001067003.1); similar to hypothetical protein OsI_037443 [Oryza sativa (indica cultivar-group)] (GB:EAY83484.1); similar to hypothetical protein LOC_Os12g36930 [Oryza sativa (japonica cultivar-group)] (GB:ABA99557.1)	-3.06
NIR1	AT2G15620	NIR1 (NITRITE REDUCTASE); ferredoxin-nitrate reductase	-3.06
AT5G52280	AT5G52280	protein transport protein-related	-3.05
RACK1B_AT	AT1G48630	guanine nucleotide-binding family protein / activated protein kinase C receptor, putative / RACK, putative	-3.05
AT5G61170	AT5G61170	40S ribosomal protein S19 (RPS19C)	-3.04
AT2G25980	AT2G25980	jacalin lectin family protein	-3.04
AT1G23410	AT1G23410	ubiquitin extension protein, putative / 40S ribosomal protein S27A (RPS27aA)	-3.04
PIP2;4	AT5G60660	PIP2;4/PIP2F (plasma membrane intrinsic protein 2;4); water channel	-3.03
AT2G14900	AT2G14900	gibberellin-regulated family protein	-3.02
AGP12	AT3G13520	AGP12 (ARABINOGALACTAN PROTEIN 12)	-3.02
LNG2	AT3G02170	LNG2 (LONGIFOLIA2)	-3.02
AT2G02780	AT2G02780	leucine-rich repeat transmembrane protein kinase, putative	-3.01
AT1G77940	AT1G77940	Ribosomal protein L7Ae/L30e/S12e/Gadd45 family protein	-3.01
AT3G15240	AT3G15240	similar to unknown protein [Arabidopsis thaliana] (TAIR:AT5G53900.2); similar to unnamed protein product [Vitis vinifera] (GB:CAO39314.1); contains domain gb def: At3g15240 (PTHR13902:SF3); contains domain SERINE/THREONINE-PROTEIN KINASE WNK (WITH NO LYSINE)-RELATED (PTHR13902)	-3.01
BGAL5	AT1G45130	BGAL5 (beta-galactosidase 5); beta-galactosidase	-3.00
GH9C1	AT1G48930	ATGH9C1 (ARABIDOPSIS THALIANA GLYCOSYL HYDROLASE 9C1); hydrolase, hydrolyzing O-glycosyl compounds	-3.00
AT3G60245	AT3G60245	Zinc-binding ribosomal protein family protein	-3.00
AXR3	AT1G04250	AXR3 (AUXIN RESISTANT 3); transcription factor	-2.99
UCC1	AT2G32300	UCC1 (UCLACYANIN 1); copper ion binding	-2.99
AT3G24670	AT3G24670	pectate lyase family protein	-2.99
AT4G31470	AT4G31470	pathogenesis-related protein, putative	-2.98
AT4G09990	AT4G09990	similar to unknown protein [Arabidopsis thaliana] (TAIR:AT1G33800.1); similar to unnamed protein product [Vitis vinifera] (GB:CAO16316.1); contains InterPro domain Protein of unknown function DUF579, plant (InterPro:IPR006514)	-2.98
SCPL34	AT5G23210	SCPL34; serine carboxypeptidase	-2.98
AT5G22440	AT5G22440	60S ribosomal protein L10A (RPL10aC)	-2.97
AT2G43150	AT2G43150	Proline-rich extensin-like family protein	-2.97
IPMI1	AT3G58990	aconitase C-terminal domain-containing protein	-2.97
AK3	AT3G02020	aspartate kinase, lysine-sensitive, putative	-2.97
PG2	AT1G70370	BURP domain-containing protein / polygalacturonase, putative	-2.96
AT3G45030	AT3G45030	40S ribosomal protein S20 (RPS20A)	-2.95
AT5G14020	AT5G14020	similar to unknown protein [Arabidopsis thaliana] (TAIR:AT1G73390.2); similar to unknown protein [Arabidopsis thaliana] (TAIR:AT1G73390.1); similar to unknown protein [Arabidopsis thaliana] (TAIR:AT1G73390.3); similar to unnamed protein product [Vitis vinifera] (GB:CAO49073.1); contains InterPro domain BRO1 (InterPro:IPR004328)	-2.94
AT3G05980	AT3G05980	similar to unknown protein [Arabidopsis thaliana] (TAIR:AT5G19340.1); similar to hypothetical protein [Vitis vinifera] (GB:CAN75979.1)	-2.94
ABCB19	AT3G28860	ATMDR11/ATPGP19/MDR1/MDR11/PGP19 (P-GLYCOPROTEIN 19); ATPase, coupled to transmembrane movement of substances / auxin efflux transmembrane transporter	-2.94
AT3G01516	AT3G01516	similar to unknown protein [Arabidopsis thaliana] (TAIR:AT5G14690.1); similar to unnamed protein product [Vitis vinifera] (GB:CAO14758.1)	-2.94
AT1G70990	AT1G70990	proline-rich family protein	-2.94
AT3G25790	AT3G25790	myb family transcription factor	-2.93
DR4	AT1G73330	ATDR4 (Arabidopsis thaliana drought-repressed 4)	-2.93
GRP5	AT3G20470	encodes a glycine-rich protein that is expressed more abundantly in immature seed pods than in stems and leaves. Expression is not detected in roots or flowers.	-2.92
AT3G62630	AT3G62630	similar to calmodulin-binding protein [Arabidopsis thaliana] (TAIR:AT2G15760.1); similar to unnamed protein product [Vitis vinifera] (GB:CAO40086.1); contains InterPro domain Protein of unknown function DUF1645 (InterPro:IPR012442)	-2.91
AT3G11120	AT3G11120	[AT3G11120, 60S ribosomal protein L41 (RPL41E)];[AT3G56020, 60S ribosomal protein L41 (RPL41G)];[AT3G08520, 60S ribosomal protein L41 (RPL41D)]	-2.91
AT2G24170	AT2G24170	endomembrane protein 70, putative	-2.91
AT3G43960	AT3G43960	cysteine proteinase, putative	-2.91
TED7	AT5G48920	hydroxyproline-rich glycoprotein family protein	-2.90
RPL24A	AT2G36620	RPL24A (RIBOSOMAL PROTEIN L24); structural constituent of ribosome	-2.90
AT3G15357	AT3G15357	unknown protein	-2.90
AT4G12600	AT4G12600	ribosomal protein L7Ae/L30e/S12e/Gadd45 family protein	-2.90
SAG21	AT4G02380	SAG21 (SENESCENCE-ASSOCIATED GENE 21)	-2.89
AT3G49960	AT3G49960	peroxidase, putative	-2.89
RFNR2	AT1G30510	ATRFNR2 (ROOT FNR 2); oxidoreductase	-2.88
AT3G20370	AT3G20370	meprin and TRAF homology domain-containing protein / MATH domain-containing protein	-2.88
AGP21	AT1G55330	AGP21 (ARABINOGALACTAN PROTEIN 21)	-2.88
AT3G55750	AT3G55750	60S ribosomal protein L35a (RPL35aD)	-2.87
AT2G01250	AT2G01250	60S ribosomal protein L7 (RPL7B)	-2.87
AT5G48940	AT5G48940	leucine-rich repeat transmembrane protein kinase, putative	-2.87
AT2G27402	AT2G27402	similar to PTAC18 (PLASTID TRANSCRIPTIONALLY ACTIVE18) [Arabidopsis thaliana] (TAIR:AT2G32180.1); similar to unknown [Brassica rapa] (GB:ABL97961.1)	-2.86
BS1	AT1G74500	bHLH family protein	-2.86
AT3G07110	AT3G07110	60S ribosomal protein L13A (RPL13aA)	-2.86
MAP65-2	AT4G26760	microtubule associated protein (MAP65/ASE1) family protein	-2.86
AT3G16780	AT3G16780	60S ribosomal protein L19 (RPL19B)	-2.86
AT5G04970	AT5G04970	pectinesterase, putative	-2.86
FUC95A	AT4G34260	catalytic	-2.86
EXPA7	AT1G12560	ATEXPA7 (ARABIDOPSIS THALIANA EXPANSIN A7)	-2.86
AT3G06460	AT3G06460	GNS1/SUR4 membrane family protein	-2.85
ARR7	AT1G19050	ARR7 (RESPONSE REGULATOR 7); transcription regulator/ two-component response regulator	-2.85
MDAR6	AT1G63940	monodehydroascorbate reductase, putative	-2.85
TOPII	AT3G23890	TOPII (TOPOISOMERASE II); ATP binding / DNA binding / DNA topoisomerase (ATP-hydrolyzing)	-2.85
MAM1	AT5G23010	MAM1 (2-isopropylmalate synthase 3); 2-isopropylmalate synthase	-2.84
AT4G22666	AT4G22666	similar to protease inhibitor/seed storage/lipid transfer protein (LTP) family protein [Arabidopsis thaliana] (TAIR:AT4G22630.1); contains InterPro domain Plant lipid transfer protein/seed storage/trypsin-alpha amylase inhibitor (InterPro:IPR003612); contains InterPro domain Bifunctional inhibitor/plant lipid transfer protein/seed storage (InterPro:IPR016140)	-2.84
AT5G42510	AT5G42510	disease resistance-responsive family protein	-2.84
AT1G19450	AT1G19450	integral membrane protein, putative / sugar transporter family protein	-2.83
AT1G65010	AT1G65010	hydrogen ion transmembrane transporter/ protein binding	-2.83
AT2G47540	AT2G47540	pollen Ole e 1 allergen and extensin family protein	-2.83
AT4G25790	AT4G25790	allergen V5/Tpx-1-related family protein	-2.82
HDA3	AT3G44750	HD2A (HISTONE DEACETYLASE 2A); nucleic acid binding / zinc ion binding	-2.82
AT4G11211	AT4G11211	unknown protein	-2.82
FER3	AT3G56090	ATFER3 (FERRITIN 3); ferric iron binding	-2.81
AT2G37700	AT2G37700	catalytic	-2.81
AT4G31320	AT4G31320	auxin-responsive protein, putative / small auxin up RNA (SAUR_C)	-2.81
AT1G13730	AT1G13730	nuclear transport factor 2 (NTF2) family protein / RNA recognition motif (RRM)-containing protein	-2.80
AT2G27710	AT2G27710	60S acidic ribosomal protein P2 (RPP2B)	-2.80
AT5G44550	AT5G44550	integral membrane family protein	-2.80
IAA7	AT3G23050	IAA7 (AUXIN RESISTANT 2); transcription factor	-2.80
AT5G42785	AT5G42785	unknown protein	-2.80
PAP7	AT2G01880	ATPAP7/PAP7 (purple acid phosphatase 7); acid phosphatase/ protein serine/threonine phosphatase	-2.79
TET7	AT4G28050	TET7 (TETRASPANIN7)	-2.79
AT3G56020	AT3G56020	60S ribosomal protein L41 (RPL41G)	-2.79
AT1G72230	AT1G72230	plastocyanin-like domain-containing protein	-2.79
AT2G17070	AT2G17070	similar to unknown protein [Arabidopsis thaliana] (TAIR:AT2G17080.1); similar to CM0216.210.nc [Lotus japonicus] (GB:BAF98210.1); contains InterPro domain Protein of unknown function DUF241, plant (InterPro:IPR004320)	-2.79
emb1075	AT1G43710	EMB1075 (EMBRYO DEFECTIVE 1075); carboxy-lyase	-2.78
SP1L4	AT5G15600	SP1L4 (SPIRAL1-LIKE4)	-2.78
LAX3	AT1G77690	amino acid permease, putative	-2.78
ADS1	AT1G06080	ADS1 (DELTA 9 DESATURASE 1); oxidoreductase	-2.78
AT1G17300	AT1G17300	similar to unknown protein [Arabidopsis thaliana] (TAIR:AT1G17285.1)	-2.78
GLP10	AT3G62020	GLP10 (GERMIN-LIKE PROTEIN 10); manganese ion binding / metal ion binding / nutrient reservoir	-2.77
AT5G13520	AT5G13520	peptidase M1 family protein	-2.77
AT3G62160	AT3G62160	transferase family protein	-2.77
AT4G23800	AT4G23800	[AT4G23810, WRKY53 (WRKY DNA-binding protein 53); DNA binding / protein binding / transcription activator/ transcription factor];[AT4G23800, high mobility group (HMG1/2) family protein]	-2.77
CLC-B	AT3G27170	[AT3G27180, similar to unnamed protein product [Vitis vinifera] (GB:CAO48997.1); similar to hypothetical protein [Vitis vinifera] (GB:CAN82187.1); contains domain RNA M5U METHYLTRANSFERASE FAMILY (PTHR11061); contains domain gb def: Emb|CAB12631.1 (PTHR11061:SF5); contains domain S-adenosyl-L-methionine-dependent methyltransferases (SSF53335)];[AT3G27170, CLC-B (chloride channel protein B); anion…	-2.77
TBL37	AT2G34070	similar to unknown protein [Arabidopsis thaliana] (TAIR:AT1G29050.1); similar to unnamed protein product [Vitis vinifera] (GB:CAO48076.1); contains InterPro domain Protein of unknown function DUF231, plant (InterPro:IPR004253)	-2.77
AT4G01140	AT4G01140	similar to unknown protein [Arabidopsis thaliana] (TAIR:AT3G08600.1); similar to unknown protein [Arabidopsis thaliana] (TAIR:AT4G23720.1); similar to unnamed protein product [Vitis vinifera] (GB:CAO45372.1); contains InterPro domain Protein of unknown function DUF1191 (InterPro:IPR010605)	-2.77
RPL23AB	AT3G55280	60S ribosomal protein L23A (RPL23aB)	-2.76
ROC5	AT4G34870	ROC5 (ROTAMASE CYP 5); peptidyl-prolyl cis-trans isomerase	-2.76
AT5G59970	AT5G59970	histone H4	-2.76
AT2G28410	AT2G28410	similar to unknown protein [Arabidopsis thaliana] (TAIR:AT5G60650.1)	-2.76
CYP86A1	AT5G58860	CYP86A1 (cytochrome P450, family 86, subfamily A, polypeptide 1); oxygen binding	-2.75
PRR1	AT1G32100	pinoresinol-lariciresinol reductase, putative	-2.75
ATMYC1	AT4G00480	ATMYC1 (Arabidopsis thaliana myc-related transcription factor 1); DNA binding / transcription factor	-2.75
AT3G62570	AT3G62570	DNAJ heat shock N-terminal domain-containing protein	-2.75
IMS2	AT5G23020	IMS2/MAM-L/MAM3 (METHYLTHIOALKYMALATE SYNTHASE-LIKE); 2-isopropylmalate synthase/ methylthioalkylmalate synthase	-2.75
AGP24	AT5G40730	AGP24 (ARABINOGALACTAN PROTEIN 24)	-2.75
GSTF11	AT3G03190	ATGSTF11 (GLUTATHIONE S-TRANSFERASE F11); glutathione transferase	-2.74
PRP3	AT3G62680	PRP3 (PROLINE-RICH PROTEIN 3); structural constituent of cell wall	-2.74
GSTF9	AT2G30860	ATGSTF9 (Arabidopsis thaliana Glutathione S-transferase (class phi) 9); glutathione transferase	-2.74
AT2G22230	AT2G22230	beta-hydroxyacyl-ACP dehydratase, putative	-2.74
AT3G04840	AT3G04840	40S ribosomal protein S3A (RPS3aA)	-2.74
CLE4	AT2G31081	CLE4 (CLAVATA3/ESR-RELATED 4); receptor binding	-2.74
AT5G38940	AT5G38940	manganese ion binding / metal ion binding / nutrient reservoir	-2.74
CIPK7	AT3G23000	CIPK7 (CBL-INTERACTING PROTEIN KINASE 7); kinase	-2.73
CYP702A2	AT4G15300	CYP702A2 (cytochrome P450, family 702, subfamily A, polypeptide 2); oxygen binding	-2.73
AT1G09690	AT1G09690	60S ribosomal protein L21 (RPL21C)	-2.73
AT1G41880	AT1G41880	60S ribosomal protein L35a (RPL35aB)	-2.73
AT5G54970	AT5G54970	similar to unknown protein [Arabidopsis thaliana] (TAIR:AT4G26960.1)	-2.73
AT5G27850	AT5G27850	60S ribosomal protein L18 (RPL18C)	-2.73
AT3G25930	AT3G25930	universal stress protein (USP) family protein	-2.73
AT3G29110	AT3G29110	terpene synthase/cyclase family protein	-2.73
AT3G20790	AT3G20790	oxidoreductase family protein	-2.72
AT5G66590	AT5G66590	allergen V5/Tpx-1-related family protein	-2.72
RALF1	AT1G02900	RALFL1 (RALF-LIKE 1)	-2.72
AT5G38930	AT5G38930	germin-like protein, putative	-2.72
HRS1	AT1G13300	myb family transcription factor	-2.71
AT3G52960	AT3G52960	peroxiredoxin type 2, putative	-2.71
EXPA14	AT5G56320	ATEXPA14 (ARABIDOPSIS THALIANA EXPANSIN A14)	-2.71
AT2G18400	AT2G18400	ribosomal protein L6 family protein	-2.70
AT4G08160	AT4G08160	glycosyl hydrolase family 10 protein / carbohydrate-binding domain-containing protein	-2.69
PMEAMT	AT1G48600	[AT1G48598, CPuORF31 (Conserved peptide upstream open reading frame 31)];[AT1G48600, phosphoethanolamine N-methyltransferase 2, putative (NMT2)]	-2.69
DS2	AT2G31360	ADS2 (16:0DELTA9 ARABIDOPSIS DESATURASE 2); oxidoreductase	-2.69
RPS6	AT4G31700	RPS6 (RIBOSOMAL PROTEIN S6); structural constituent of ribosome	-2.69
RPL23AA	AT2G39460	ATRPL23A (RIBOSOMAL PROTEIN L23A); RNA binding / structural constituent of ribosome	-2.68
RPL34	AT1G69620	RPL34 (RIBOSOMAL PROTEIN L34); structural constituent of ribosome	-2.68
AT1G57660	AT1G57660	[AT1G57660, 60S ribosomal protein L21 (RPL21E)];[AT1G57860, 60S ribosomal protein L21]	-2.68
CIP7	AT4G27430	CIP7 (COP1-INTERACTING PROTEIN 7)	-2.68
AT4G30410	AT4G30410	transcription factor	-2.67
MOD1	AT2G05990	MOD1 (MOSAIC DEATH 1); enoyl-[acyl-carrier-protein] reductase (NADH)/ oxidoreductase	-2.67
RPS13A	AT4G00100	ATRPS13A (RIBOSOMAL PROTEIN S13A); structural constituent of ribosome	-2.67
ASP4	AT1G62800	ASP4 (ASPARTATE AMINOTRANSFERASE 4); catalytic/ pyridoxal phosphate binding / transaminase/ transferase, transferring nitrogenous groups	-2.67
MYB66	AT5G14750	ATMYB66/WER/WER1 (WEREWOLF 1); DNA binding / protein binding / transcription factor/ transcription regulator	-2.67
AT2G37790	AT2G37790	aldo/keto reductase family protein	-2.66
AT2G39040	AT2G39040	peroxidase, putative	-2.66
CYP93D1	AT5G06900	CYP93D1 (cytochrome P450, family 93, subfamily D, polypeptide 1); oxygen binding	-2.66
scpl40	AT3G63470	SCPL40 (serine carboxypeptidase-like 40); serine carboxypeptidase	-2.66
KCS4	AT1G19440	very-long-chain fatty acid condensing enzyme, putative	-2.66
FAH2	AT4G20870	fatty acid hydroxylase, putative	-2.66
RCI3	AT1G05260	RCI3 (RARE COLD INDUCIBLE GENE 3); peroxidase	-2.65
SOT18	AT1G74090	sulfotransferase family protein	-2.65
AT1G77520	AT1G77520	O-methyltransferase family 2 protein	-2.65
MDHAR	AT3G09940	ATMDAR3/MDHAR (MONODEHYDROASCORBATE REDUCTASE); monodehydroascorbate reductase (NADH)	-2.64
ADF11	AT1G01750	actin-depolymerizing factor, putative	-2.64
MIPS3	AT5G10170	inositol-3-phosphate synthase, putative / myo-inositol-1-phosphate synthase, putative / MI-1-P synthase, putative	-2.64
AT1G03010	AT1G03010	phototropic-responsive NPH3 family protein	-2.63
AT1G27400	AT1G27400	60S ribosomal protein L17 (RPL17A)	-2.63
AT1G17745	AT1G17745	PGDH (3-PHOSPHOGLYCERATE DEHYDROGENASE); phosphoglycerate dehydrogenase	-2.63
AT3G07320	AT3G07320	glycosyl hydrolase family 17 protein	-2.63
RABA1b	AT1G16920	RAB11 (ARABIDOPSIS RAB GTPASE HOMOLOG A1B); GTP binding	-2.62
AT3G16080	AT3G16080	60S ribosomal protein L37 (RPL37C)	-2.62
AT4G30800	AT4G30800	40S ribosomal protein S11 (RPS11B)	-2.62
TAR2	AT4G24670	alliinase family protein	-2.61
AT5G18790	AT5G18790	ribosomal protein L33 family protein	-2.61
FKBP15-2	AT5G48580	FKBP15-2 (FK506-binding protein 15 kD-2); FK506 binding / peptidyl-prolyl cis-trans isomerase	-2.61
AT2G39530	AT2G39530	integral membrane protein, putative	-2.61
AT3G28900	AT3G28900	60S ribosomal protein L34 (RPL34C)	-2.61
AT4G38660	AT4G38660	thaumatin, putative	-2.61
CPK2	AT3G10660	CPK2 (CALMODULIN-DOMAIN PROTEIN KINASE CDPK ISOFORM 2); calmodulin-dependent protein kinase/ kinase	-2.61
GL22	AT1G02335	GL22 (GERMIN-LIKE PROTEIN SUBFAMILY 2 MEMBER 2 PRECURSOR.); manganese ion binding / metal ion binding / nutrient reservoir	-2.61
AT1G21090	AT1G21090	hydroxyproline-rich glycoprotein family protein	-2.61
AT3G56340	AT3G56340	40S ribosomal protein S26 (RPS26C)	-2.61
AT4G22217	AT4G22217	Encodes a defensin-like (DEFL) family protein.	-2.61
AGP13	AT4G26320	AGP13 (ARABINOGALACTAN PROTEIN 13)	-2.61
EMB1080	AT3G48930	EMB1080 (EMBRYO DEFECTIVE 1080); structural constituent of ribosome	-2.60
RACK1C_AT	AT3G18130	guanine nucleotide-binding family protein / activated protein kinase C receptor (RACK1)	-2.60
AT5G46900	AT5G46900	protease inhibitor/seed storage/lipid transfer protein (LTP) family protein	-2.59
AKN2	AT4G39940	AKN2 (APS-KINASE 2); ATP binding / kinase/ transferase, transferring phosphorus-containing groups	-2.59
AT2G39900	AT2G39900	LIM domain-containing protein	-2.59
ENODL19	AT4G12880	plastocyanin-like domain-containing protein	-2.59
AT4G00670	AT4G00670	[AT4G00660, DEAD/DEAH box helicase, putative];[AT4G00670, DNA binding]	-2.59
IRX1	AT4G18780	[AT4G18770, MYB98 (myb domain protein 98); DNA binding / transcription factor];[AT4G18780, CESA8 (CELLULOSE SYNTHASE 8); cellulose synthase/ transferase, transferring glycosyl groups]	-2.59
RPS11-BETA	AT5G23740	RPS11-BETA (RIBOSOMAL PROTEIN S11-BETA); structural constituent of ribosome	-2.58
TUB8	AT5G23860	TUB8 (tubulin beta-8)	-2.58
IRX3	AT5G17420	IRX3 (IRREGULAR XYLEM 3, MURUS 10); cellulose synthase	-2.58
AT5G51560	AT5G51560	leucine-rich repeat transmembrane protein kinase, putative	-2.58
UBQ5	AT3G62250	UBQ5 (UBIQUITIN 5); protein binding	-2.58
HTB2	AT5G22880	H2B/HTB2 (HISTONE H2B); DNA binding	-2.57
AT4G10450	AT4G10450	60S ribosomal protein L9 (RPL90D)	-2.57
AT3G47370	AT3G47370	40S ribosomal protein S20 (RPS20B)	-2.57
CYP79B3	AT2G22330	CYP79B3 (cytochrome P450, family 79, subfamily B, polypeptide 3); oxygen binding	-2.57
AT5G45775	AT5G45775	60S ribosomal protein L11 (RPL11D)	-2.57
AT1G67590	AT1G67590	remorin family protein	-2.57
AT1G50110	AT1G50110	branched-chain amino acid aminotransferase 6 / branched-chain amino acid transaminase 6 (BCAT6)	-2.57
AT5G10390	AT5G10390	histone H3	-2.57
AT4G36130	AT4G36130	60S ribosomal protein L8 (RPL8C)	-2.57
MSRB9	AT4G21850	methionine sulfoxide reductase domain-containing protein / SeIR domain-containing protein	-2.57
MLP43	AT1G70890	MLP43 (MLP-LIKE PROTEIN 43)	-2.57
AT1G52790	AT1G52790	oxidoreductase, 2OG-Fe(II) oxygenase family protein	-2.57
AT1G33800	AT1G33800	similar to unknown protein [Arabidopsis thaliana] (TAIR:AT4G09990.1); similar to unknown [Populus trichocarpa] (GB:ABK93991.1); contains InterPro domain Protein of unknown function DUF579, plant (InterPro:IPR006514)	-2.57
AT3G23090	AT3G23090	similar to WDL1 (WVD2-LIKE 1) [Arabidopsis thaliana] (TAIR:AT3G04630.2); similar to WDL1 (WVD2-LIKE 1) [Arabidopsis thaliana] (TAIR:AT3G04630.3); similar to seed specific protein Bn15D14A [Brassica napus] (GB:AAP37969.1); contains InterPro domain Targeting for Xklp2 (InterPro:IPR009675)	-2.56
FAD3	AT2G29980	FAD3 (FATTY ACID DESATURASE 3); omega-3 fatty acid desaturase	-2.56
CAC1	AT5G16390	BCCP/BCCP-1/BCCP1/CAC1-A/CAC1A (BIOTIN CARBOXYL CARRIER, BIOTIN CARBOXYL CARRIER PROTEIN 1); biotin binding	-2.55
AT5G10130	AT5G10130	pollen Ole e 1 allergen and extensin family protein	-2.55
AT3G23390	AT3G23390	60S ribosomal protein L36a/L44 (RPL36aA)	-2.55
AT4G00810	AT4G00810	60S acidic ribosomal protein P1 (RPP1B)	-2.55
AT5G17820	AT5G17820	peroxidase 57 (PER57) (P57) (PRXR10)	-2.55
AT4G37240	AT4G37240	similar to unknown protein [Arabidopsis thaliana] (TAIR:AT2G23690.1); similar to unnamed protein product [Vitis vinifera] (GB:CAO45438.1); similar to hypothetical protein [Vitis vinifera] (GB:CAN61825.1)	-2.55
AT5G43020	AT5G43020	leucine-rich repeat transmembrane protein kinase, putative	-2.54
LAC17	AT5G60020	[AT5G60022, other RNA];[AT5G60020, LAC17 (laccase 17); copper ion binding / oxidoreductase]	-2.54
EIR1	AT5G57090	EIR1 (ETHYLENE INSENSITIVE ROOT 1); auxin:hydrogen symporter/ transporter	-2.54
AT3G05560	AT3G05560	60S ribosomal protein L22-2 (RPL22B)	-2.54
AT3G27950	AT3G27950	early nodule-specific protein, putative	-2.54
EXPA11	AT1G20190	ATEXPA11 (ARABIDOPSIS THALIANA EXPANSIN A11)	-2.54
AT5G56710	AT5G56710	60S ribosomal protein L31 (RPL31C)	-2.54
AT4G15000	AT4G15000	60S ribosomal protein L27 (RPL27C)	-2.54
PFL	AT1G22780	PFL (POINTED FIRST LEAVES); structural constituent of ribosome	-2.54
AT1G70600	AT1G70600	60S ribosomal protein L27A (RPL27aC)	-2.54
AT4G14980	AT4G14980	DC1 domain-containing protein	-2.53
AT1G61170	AT1G61170	similar to unknown protein [Arabidopsis thaliana] (TAIR:AT1G11120.1)	-2.53
AT3G48970	AT3G48970	copper-binding family protein	-2.53
ERG28	AT1G10030	ERG28 (ARABIDOPSIS HOMOLOG OF YEAST ERGOSTEROL28)	-2.53
RPL5B	AT5G39740	RIBOSOMAL PROTEIN L5 B	-2.53
AT5G02870	AT5G02870	60S ribosomal protein L4/L1 (RPL4D)	-2.53
PDF2.5	AT5G63660	LCR74/PDF2.5 (Low-molecular-weight cysteine-rich 74)	-2.53
NPSN11	AT2G35190	NPSN11 (NOVEL PLANT SNARE 11); protein transporter	-2.53
ADK2	AT5G03300	ADK2 (ADENOSINE KINASE 2); kinase	-2.52
AT3G01260	AT3G01260	aldose 1-epimerase family protein	-2.52
AT3G03920	AT3G03920	Gar1 RNA-binding region family protein	-2.52
AT5G26260	AT5G26260	meprin and TRAF homology domain-containing protein / MATH domain-containing protein	-2.52
LCR68	AT2G02130	LCR68/PDF2.3 (Low-molecular-weight cysteine-rich 68); protease inhibitor	-2.52
PUB29	AT3G18710	U-box domain-containing protein	-2.51
ENODL18	AT1G08500	plastocyanin-like domain-containing protein	-2.51
AT5G27330	AT5G27330	similar to unknown protein [Arabidopsis thaliana] (TAIR:AT3G05130.1); similar to unnamed protein product [Vitis vinifera] (GB:CAO68600.1); contains InterPro domain Prefoldin (InterPro:IPR009053)	-2.51
P5CR	AT5G14800	P5CR (PYRROLINE-5- CARBOXYLATE (P5C) REDUCTASE); pyrroline-5-carboxylate reductase	-2.50
AT2G43535	AT2G43535	trypsin inhibitor, putative	-2.50
AT2G31790	AT2G31790	UDP-glucoronosyl/UDP-glucosyl transferase family protein	-2.50
UGT71C1	AT2G29750	UDP-glucoronosyl/UDP-glucosyl transferase family protein	-2.50
AT1G26880	AT1G26880	60S ribosomal protein L34 (RPL34A)	-2.49
RALFL27	AT3G29780	RALFL27 (RALF-LIKE 27)	-2.49
AT4G19410	AT4G19410	pectinacetylesterase, putative	-2.49
AT3G45710	AT3G45710	proton-dependent oligopeptide transport (POT) family protein	-2.49
HSP60	AT3G23990	HSP60 (Heat shock protein 60); ATP binding / protein binding / unfolded protein binding	-2.49
EMB2296	AT2G18020	EMB2296 (EMBRYO DEFECTIVE 2296); structural constituent of ribosome	-2.49
RHS8	AT1G63450	catalytic	-2.49
AT4G19760	AT4G19760	hydrolase, hydrolyzing O-glycosyl compounds	-2.48
CYCB1;3	AT3G11520	CYCB1;3 (CYCLIN B1;3); cyclin-dependent protein kinase regulator	-2.48
AT1G29740	AT1G29740	leucine-rich repeat family protein / protein kinase family protein	-2.48
LGO	AT3G10525	similar to SIM (SIAMESE) [Arabidopsis thaliana] (TAIR:AT5G04470.1)	-2.47
AT5G65683	AT5G65683	zinc finger (C3HC4-type RING finger) family protein	-2.47
IQD31	AT1G74690	IQD31 (IQ-domain 31); calmodulin binding	-2.47
MC3	AT5G64240	ATMC3 (METACASPASE 3); caspase	-2.47
AT3G51280	AT3G51280	male sterility MS5, putative	-2.47
FK	AT3G52940	FK (FACKEL); delta14-sterol reductase	-2.47
ANNAT4	AT2G38750	ANNAT4 (ANNEXIN ARABIDOPSIS 4); calcium ion binding / calcium-dependent phospholipid binding	-2.47
AT1G52060	AT1G52060	similar to jacalin lectin family protein [Arabidopsis thaliana] (TAIR:AT1G52070.1); similar to jasmonate inducible protein [Brassica napus] (GB:CAA72271.1); contains InterPro domain Mannose-binding lectin (InterPro:IPR001229)	-2.46
AT2G33370	AT2G33370	60S ribosomal protein L23 (RPL23B)	-2.46
AT3G56230	AT3G56230	speckle-type POZ protein-related	-2.46
CDC20.1	AT4G33270	CDC20.1; signal transducer	-2.46
AT2G43600	AT2G43600	glycoside hydrolase family 19 protein	-2.46
AT-IE	AT1G31860	AT-IE (Arabidopsis thaliana bifunctional HisI-HisE protein)	-2.46
AT2G21580	AT2G21580	40S ribosomal protein S25 (RPS25B)	-2.46
CNGC14	AT2G24610	ATCNGC14 (cyclic nucleotide gated channel 14); calmodulin binding / cyclic nucleotide binding / ion channel	-2.46
FLA12	AT5G60490	FLA12 (fasciclin-like arabinogalactan-protein 12)	-2.46
EMB3003	AT1G34430	EMB3003 (EMBRYO DEFECTIVE 3003); dihydrolipoyllysine-residue acetyltransferase	-2.45
ANNAT3	AT2G38760	ANNAT3 (ANNEXIN ARABIDOPSIS 3); calcium ion binding / calcium-dependent phospholipid binding	-2.45
PYR4	AT4G22930	PYR4 (PYRIMIDIN 4); dihydroorotase	-2.45
AT3G48340	AT3G48340	cysteine-type peptidase	-2.45
AT5G54370	AT5G54370	late embryogenesis abundant protein-related / LEA protein-related	-2.45
UREG	AT2G34470	UREG (urease accessory protein G); metal ion binding / nucleotide binding	-2.45
EXL4	AT5G09440	phosphate-responsive protein, putative	-2.45
AT3G29370	AT3G29370	similar to unknown protein [Arabidopsis thaliana] (TAIR:AT5G39240.1)	-2.45
AT3G13175	AT3G13175	similar to unnamed protein product [Vitis vinifera] (GB:CAO45116.1)	-2.45
AT4G30170	AT4G30170	peroxidase, putative	-2.45
AT5G40020	AT5G40020	pathogenesis-related thaumatin family protein	-2.45
MVA1	AT4G11820	MVA1 (HYDROXYMETHYLGLUTARYL-COA SYNTHASE); acetyl-CoA C-acetyltransferase/ hydroxymethylglutaryl-CoA synthase	-2.44
AT4G29410	AT4G29410	60S ribosomal protein L28 (RPL28C)	-2.44
AT1G36060	AT1G36060	AP2 domain-containing transcription factor, putative	-2.44
AT4G25890	AT4G25890	60S acidic ribosomal protein P3 (RPP3A)	-2.44
LAC2	AT2G29130	LAC2 (laccase 2); copper ion binding / oxidoreductase	-2.44
GAMMA-H2AX	AT1G54690	G-H2AX/GAMMA-H2AX/H2AXB/HTA3; DNA binding	-2.44
AT4G26230	AT4G26230	60S ribosomal protein L31 (RPL31B)	-2.44
RPL18	AT3G05590	RPL18 (RIBOSOMAL PROTEIN L18); structural constituent of ribosome	-2.44
AT1G33750	AT1G33750	terpene synthase/cyclase family protein	-2.43
ROC4	AT3G62030	ROC4 (ROTAMASE CYP 4); peptidyl-prolyl cis-trans isomerase	-2.43
AMT1;2	AT1G64780	ATAMT1;2 (AMMONIUM TRANSPORTER 1;2); ammonium transmembrane transporter	-2.43
AT4G15390	AT4G15390	transferase family protein	-2.43
DI21	AT4G15910	DROUGHT-INDUCED 21	-2.43
PRMT1A	AT2G19670	protein arginine N-methyltransferase, putative	-2.43
SVL1	AT5G55480	glycerophosphoryl diester phosphodiesterase family protein	-2.43
AT5G08180	AT5G08180	ribosomal protein L7Ae/L30e/S12e/Gadd45 family protein	-2.42
AT3G23940	AT3G23940	dehydratase family	-2.42
AT1G23100	AT1G23100	10 kDa chaperonin, putative	-2.42
AT1G72730	AT1G72730	eukaryotic translation initiation factor 4A, putative / eIF-4A, putative	-2.42
CYP71A16	AT5G42590	CYP71A16 (cytochrome P450, family 71, subfamily A, polypeptide 16); oxygen binding	-2.42
AT3G52460	AT3G52460	hydroxyproline-rich glycoprotein family protein	-2.42
BBC1	AT3G49010	ATBBC1 (breast basic conserved 1); structural constituent of ribosome	-2.42
AT5G43830	AT5G43830	similar to unknown protein [Arabidopsis thaliana] (TAIR:AT3G22850.1); similar to aluminum-induced protein-like protein [Thellungiella halophila] (GB:AAM19711.1); contains domain G3DSA:3.60.20.10 (G3DSA:3.60.20.10); contains domain SSF56235 (SSF56235)	-2.42
AT4G24830	AT4G24830	arginosuccinate synthase family	-2.42
AT4G14200	AT4G14200	similar to unnamed protein product [Vitis vinifera] (GB:CAO66985.1); contains domain PENTATRICOPEPTIDE REPEAT-CONTAINING PROTEIN-RELATED (PTHR10483:SF9); contains domain PENTATRICOPEPTIDE REPEAT-CONTAINING PROTEIN (PTHR10483)	-2.41
AT5G10400	AT5G10400	histone H3	-2.41
AT5G16130	AT5G16130	Ribosomal protein S7e family protein	-2.41
AT1G77750	AT1G77750	30S ribosomal protein S13, chloroplast, putative	-2.40
AT5G23840	AT5G23840	MD-2-related lipid recognition domain-containing protein / ML domain-containing protein	-2.40
AT1G65570	AT1G65570	polygalacturonase, putative / pectinase, putative	-2.40
CESA4	AT5G44030	CESA4 (CELLULOSE SYNTHASE 4); transferase, transferring glycosyl groups	-2.40
GSTU28	AT1G53680	ATGSTU28 (Arabidopsis thaliana Glutathione S-transferase (class tau) 28); glutathione transferase	-2.40
AT4G16720	AT4G16720	60S ribosomal protein L15 (RPL15A)	-2.40
AT3G02640	AT3G02640	similar to unknown protein [Arabidopsis thaliana] (TAIR:AT5G16250.1); similar to unknown [Populus trichocarpa] (GB:ABK93711.1)	-2.39
AT1G09580	AT1G09580	emp24/gp25L/p24 family protein	-2.39
LRL3	AT5G58010	basic helix-loop-helix (bHLH) family protein	-2.39
AT3G53190	AT3G53190	pectate lyase family protein	-2.39
AT1G20950	AT1G20950	pyrophosphate--fructose-6-phosphate 1-phosphotransferase-related / pyrophosphate-dependent 6-phosphofructose-1-kinase-related	-2.39
AT5G16070	AT5G16070	chaperonin, putative	-2.39
AT5G02960	AT5G02960	40S ribosomal protein S23 (RPS23B)	-2.39
MLP-300B	AT3G16440	ATMLP-300B (MYROSINASE-BINDING PROTEIN-LIKE PROTEIN-300B)	-2.38
AT2G41800	AT2G41800	similar to unknown protein [Arabidopsis thaliana] (TAIR:AT2G41810.1); similar to unnamed protein product [Vitis vinifera] (GB:CAO23583.1); similar to hypothetical protein [Vitis vinifera] (GB:CAN80832.1); contains InterPro domain Protein of unknown function DUF642 (InterPro:IPR006946); contains InterPro domain Galactose-binding like (InterPro:IPR008979)	-2.38
RALFL34	AT5G67070	RALFL34 (RALF-LIKE 34)	-2.38
AT5G47950	AT5G47950	transferase family protein	-2.38
AT1G26100	AT1G26100	cytochrome B561 family protein	-2.38
AT2G43460	AT2G43460	60S ribosomal protein L38 (RPL38A)	-2.38
BGLU34	AT1G47600	glycosyl hydrolase family 1 protein	-2.37
AT3G62040	AT3G62040	hydrolase	-2.37
AT1G09590	AT1G09590	60S ribosomal protein L21 (RPL21A)	-2.37
RGP2	AT5G15650	RGP2 (REVERSIBLY GLYCOSYLATED POLYPEPTIDE 2); alpha-1,4-glucan-protein synthase (UDP-forming)	-2.37
AT2G22190	AT2G22190	trehalose-phosphatase	-2.37
AT4G37700	AT4G37700	similar to unknown protein [Arabidopsis thaliana] (TAIR:AT5G65925.1)	-2.37
AT3G46400	AT3G46400	leucine-rich repeat protein kinase, putative	-2.37
AT2G05220	AT2G05220	40S ribosomal protein S17 (RPS17B)	-2.37
AT4G16141	AT4G16141	similar to zinc finger (GATA type) family protein [Arabidopsis thaliana] (TAIR:AT3G16870.1); contains domain Glucocorticoid receptor-like (DNA-binding domain) (SSF57716)	-2.37
ATPMEPCRB	AT4G02330	ATPMEPCRB; pectinesterase	-2.36
AT5G47700	AT5G47700	60S acidic ribosomal protein P1 (RPP1C)	-2.36
AT2G25210	AT2G25210	60S ribosomal protein L39 (RPL39A)	-2.36
BGAL10	AT5G63810	BGAL10 (beta-galactosidase 10); beta-galactosidase	-2.36
XT2	AT4G02500	ATXT2; UDP-xylosyltransferase/ transferase/ transferase, transferring glycosyl groups	-2.36
AT3G26610	AT3G26610	polygalacturonase, putative / pectinase, putative	-2.36
BES1	AT1G19350	BES1 (BRI1-EMS-SUPPRESSOR 1); transcription regulator	-2.35
AT3G48410	AT3G48410	hydrolase, alpha/beta fold family protein	-2.35
SIR	AT5G04590	SIR (sulfite reductase); sulfite reductase (ferredoxin)	-2.35
AT3G08030	AT3G08030	similar to unknown protein [Arabidopsis thaliana] (TAIR:AT2G41800.1); similar to unnamed protein product [Vitis vinifera] (GB:CAO40802.1); contains InterPro domain Protein of unknown function DUF642 (InterPro:IPR006946)	-2.35
AT3G29320	AT3G29320	glucan phosphorylase, putative	-2.35
AT5G55180	AT5G55180	glycosyl hydrolase family 17 protein	-2.35
AT3G18200	AT3G18200	nodulin MtN21 family protein	-2.35
AT5G59850	AT5G59850	40S ribosomal protein S15A (RPS15aF)	-2.35
IAMT1	AT5G55250	IAMT1 (IAA CARBOXYLMETHYLTRANSFERASE 1); S-adenosylmethionine-dependent methyltransferase	-2.35
APT3	AT4G22570	APT3 (ADENINE PHOSPHORIBOSYL TRANSFERASE 3); adenine phosphoribosyltransferase	-2.35
AT3G59540	AT3G59540	60S ribosomal protein L38 (RPL38B)	-2.35
AT5G08690	AT5G08690	ATP synthase beta chain 2, mitochondrial	-2.35
AT1G06930	AT1G06930	unknown protein	-2.34
AT4G10480	AT4G10480	nascent polypeptide associated complex alpha chain protein, putative / alpha-NAC, putative	-2.34
AT4G19980	AT4G19980	unknown protein	-2.34
AT1G07730	AT1G07730	[AT1G07740, pentatricopeptide (PPR) repeat-containing protein];[AT1G07730, disease resistance-responsive family protein]	-2.34
AT5G27820	AT5G27820	ribosomal protein L18 family protein	-2.34
AT5G15200	AT5G15200	40S ribosomal protein S9 (RPS9B)	-2.34
AT3G53430	AT3G53430	60S ribosomal protein L12 (RPL12B)	-2.34
RAC6	AT4G35950	ARAC6/ATROP5/RAC2 (RHO-RELATED PROTEIN FROM PLANTS 7); GTP binding	-2.34
AT2G35120	AT2G35120	glycine cleavage system H protein, mitochondrial, putative	-2.34
AT2G34480	AT2G34480	Ribosomal protein L18ae/LX family protein	-2.34
IQD18	AT1G01110	IQD18 (IQ-domain 18)	-2.33
CYCB1;4	AT2G26760	CYCB1;4; cyclin-dependent protein kinase regulator	-2.33
AT1G21740	AT1G21740	similar to unknown protein [Arabidopsis thaliana] (TAIR:AT1G77500.1); similar to hypothetical protein [Vitis vinifera] (GB:CAN81539.1); contains InterPro domain Protein of unknown function DUF632 (InterPro:IPR006867); contains InterPro domain Protein of unknown function DUF630 (InterPro:IPR006868)	-2.33
AT2G45180	AT2G45180	protease inhibitor/seed storage/lipid transfer protein (LTP) family protein	-2.33
ADF8	AT4G00680	actin-depolymerizing factor, putative	-2.33
AT1G04680	AT1G04680	pectate lyase family protein	-2.33
AT2G17630	AT2G17630	phosphoserine aminotransferase, putative	-2.33
AT1G75640	AT1G75640	leucine-rich repeat family protein / protein kinase family protein	-2.32
EDA9	AT4G34200	EDA9 (embryo sac development arrest 9); NAD binding / amino acid binding / binding / catalytic/ cofactor binding / oxidoreductase, acting on the CH-OH group of donors, NAD or NADP as acceptor / phosphoglycerate dehydrogenase	-2.32
AT3G22230	AT3G22230	60S ribosomal protein L27 (RPL27B)	-2.32
AT1G05210	AT1G05210	similar to unknown protein [Arabidopsis thaliana] (TAIR:AT2G32380.1); similar to unnamed protein product [Vitis vinifera] (GB:CAO24140.1); contains InterPro domain Transmembrane protein 97, predicted (InterPro:IPR016964)	-2.32
AT5G07090	AT5G07090	40S ribosomal protein S4 (RPS4B)	-2.32
FUT6	AT1G14080	FUT6 (fucosyltransferase 6); fucosyltransferase/ transferase, transferring glycosyl groups	-2.32
AT1G54010	AT1G54010	myrosinase-associated protein, putative	-2.32
ROC2	AT3G56070	ROC2 (rotamase CyP 2); peptidyl-prolyl cis-trans isomerase	-2.32
AT3G10610	AT3G10610	40S ribosomal protein S17 (RPS17C)	-2.32
RHS16	AT4G29180	leucine-rich repeat protein kinase, putative	-2.32
AT1G06090	AT1G06090	fatty acid desaturase family protein	-2.31
AT1G66800	AT1G66800	cinnamyl-alcohol dehydrogenase family / CAD family	-2.31
AT1G01300	AT1G01300	aspartyl protease family protein	-2.31
AT5G15180	AT5G15180	peroxidase, putative	-2.31
AT1G67870	AT1G67870	glycine-rich protein	-2.31
AT3G21340	AT3G21340	leucine-rich repeat protein kinase, putative	-2.31
ACLB-2	AT5G49460	ACLB-2 (ATP-citrate lyase B-2)	-2.31
AT4G14320	AT4G14320	60S ribosomal protein L36a/L44 (RPL36aB)	-2.31
tny	AT5G25810	TNY (TINY); DNA binding / transcription factor	-2.31
P40	AT1G72370	P40 (40S ribosomal protein SA); structural constituent of ribosome	-2.31
AT3G54470	AT3G54470	uridine 5'-monophosphate synthase / UMP synthase (PYRE-F) (UMPS)	-2.30
AT5G04960	AT5G04960	pectinesterase family protein	-2.30
AT5G57770	AT5G57770	[AT5G57770, similar to unnamed protein product [Vitis vinifera] (GB:CAO66578.1); contains InterPro domain Pleckstrin-like, plant (InterPro:IPR013666); contains InterPro domain Protein of unknown function DUF828, plant (InterPro:IPR008546)];[AT5G57760, unknown protein]	-2.30
ENO1	AT1G74030	enolase, putative	-2.30
SPL3	AT2G33810	[AT2G33815, other RNA];[AT2G33810, SPL3 (SQUAMOSA PROMOTER BINDING PROTEIN-LIKE 3); transcription factor]	-2.30
CESA2	AT4G39350	CESA2 (CELLULOSE SYNTHASE 2); cellulose synthase/ transferase, transferring glycosyl groups	-2.30
RR3	AT2G41310	ATRR3 (RESPONSE REGULATOR 3); transcription regulator	-2.30
ANNAT1	AT1G35720	ANNAT1 (ANNEXIN ARABIDOPSIS 1); calcium ion binding / calcium-dependent phospholipid binding	-2.30
AT4G26660	AT4G26660	similar to unknown protein [Arabidopsis thaliana] (TAIR:AT5G55520.1); similar to unknown protein [Arabidopsis thaliana] (TAIR:AT5G55520.2); similar to unnamed protein product [Vitis vinifera] (GB:CAO38858.1); contains InterPro domain Kinesin-related (InterPro:IPR010544)	-2.30
ATCSLB05	AT4G15290	ATCSLB05 (Cellulose synthase-like B5); transferase/ transferase, transferring glycosyl groups	-2.29
AT3G07000	AT3G07000	DC1 domain-containing protein	-2.29
AT1G67750	AT1G67750	pectate lyase family protein	-2.29
AT2G13820	AT2G13820	protease inhibitor/seed storage/lipid transfer protein (LTP) family protein	-2.29
AT3G49910	AT3G49910	Translation protein SH3-like family protein	-2.29
RL3	AT4G36570	RAD-like 3	-2.29
CPuORF30	AT3G17998	[AT3G17998, CPuORF30 (Conserved peptide upstream open reading frame 30)];[AT3G18000, NMT1 (N-METHYLTRANSFERASE 1); phosphoethanolamine N-methyltransferase]	-2.29
AT3G06035	AT3G06035	Identical to Uncharacterized GPI-anchored protein At3g06035 precursor [Arabidopsis Thaliana] (GB:Q84MC0;GB:Q8H7F7;GB:Q8L9J0); similar to unknown protein [Arabidopsis thaliana] (TAIR:AT5G19250.1); similar to unknown [Populus trichocarpa] (GB:ABK94712.1)	-2.29
PUP4	AT1G30840	ATPUP4 (Arabidopsis thaliana purine permease 4); purine transmembrane transporter	-2.29
HSFC1	AT3G24520	AT-HSFC1 (Arabidopsis thaliana heat shock transcription factor C1); DNA binding / transcription factor	-2.28
CYSD2	AT5G28020	ATCYSD2 (Arabidopsis thaliana cysteine synthase D2); cysteine synthase	-2.28
RKL1	AT1G48480	RKL1 (Receptor-like kinase 1); ATP binding / kinase/ protein serine/threonine kinase	-2.28
MOT1	AT2G25680	MOT1 (MOLYBDATE TRANSPORTER 1); molybdate ion transmembrane transporter/ sulfate transmembrane transporter	-2.28
AT3G27360	AT3G27360	histone H3	-2.28
AT3G02120	AT3G02120	hydroxyproline-rich glycoprotein family protein	-2.28
AT1G73940	AT1G73940	similar to unknown protein [Arabidopsis thaliana] (TAIR:AT5G49410.1); similar to unknown protein [Arabidopsis thaliana] (TAIR:AT5G49410.2); similar to unnamed protein product [Vitis vinifera] (GB:CAO62865.1)	-2.27
AT4G25250	AT4G25250	invertase/pectin methylesterase inhibitor family protein	-2.27
TUA2	AT1G50010	[AT1G50010, TUA2 (tubulin alpha-2 chain)];[AT1G04820, TUA4 (tubulin alpha-4 chain)]	-2.27
AT1G24420	AT1G24420	transferase family protein	-2.27
BGAL3	AT4G36360	BGAL3 (beta-galactosidase 3); beta-galactosidase	-2.27
AT5G27120	AT5G27120	SAR DNA-binding protein, putative	-2.27
FPS2	AT4G17190	FPS2 (FARNESYL DIPHOSPHATE SYNTHASE 2); dimethylallyltranstransferase/ geranyltranstransferase	-2.27
PIP1C	AT1G01620	PIP1C (PLASMA MEMBRANE INTRINSIC PROTEIN 1;3); water channel	-2.27
AT1G33612	AT1G33612	leucine-rich repeat family protein	-2.26
AT2G32060	AT2G32060	40S ribosomal protein S12 (RPS12C)	-2.26
SHM4	AT4G13930	SERINE HYDROXYMETHYLTRANSFERASE 4	-2.26
AT4G39200	AT4G39200	40S ribosomal protein S25 (RPS25E)	-2.26
AT1G80280	AT1G80280	hydrolase, alpha/beta fold family protein	-2.26
AT1G14960	AT1G14960	major latex protein-related / MLP-related	-2.26
PAR2	AT3G58850	PAR2 (PHY RAPIDLY REGULATED 2); transcription regulator	-2.26
AT3G52500	AT3G52500	aspartyl protease family protein	-2.26
RPS5B	AT2G37270	ATRPS5B (RIBOSOMAL PROTEIN 5B); structural constituent of ribosome	-2.25
AT4G29270	AT4G29270	acid phosphatase class B family protein	-2.25
AT3G22570	AT3G22570	protease inhibitor/seed storage/lipid transfer protein (LTP) family protein	-2.25
HAM2	AT3G60630	scarecrow transcription factor family protein	-2.25
AT3G02100	AT3G02100	UDP-glucoronosyl/UDP-glucosyl transferase family protein	-2.25
AT5G56040	AT5G56040	leucine-rich repeat protein kinase, putative	-2.25
AAP4	AT5G63850	AAP4 (amino acid permease 4); amino acid transmembrane transporter	-2.24
AT1G79620	AT1G79620	leucine-rich repeat transmembrane protein kinase, putative	-2.24
NRT1.1	AT1G12110	NRT1.1 (NITRATE TRANSPORTER 1.1); transporter	-2.24
SDH1-2	AT2G18450	SDH1-2 (Succinate dehydrogenase 1-2)	-2.24
AT1G52910	AT1G52910	similar to unknown protein [Arabidopsis thaliana] (TAIR:AT3G15480.1); similar to unknown [Populus trichocarpa] (GB:ABK94458.1); contains InterPro domain Protein of unknown function DUF1218 (InterPro:IPR009606)	-2.24
AT5G56670	AT5G56670	40S ribosomal protein S30 (RPS30C)	-2.24
AT5G60670	AT5G60670	60S ribosomal protein L12 (RPL12C)	-2.23
AT4G30320	AT4G30320	allergen V5/Tpx-1-related family protein	-2.23
PMR6	AT3G54920	PMR6 (POWDERY MILDEW RESISTANT 6); lyase/ pectate lyase	-2.23
AT2G41970	AT2G41970	protein kinase, putative	-2.23
AT1G57860	AT1G57860	translation protein SH3-like family protein	-2.23
AT1G64880	AT1G64880	ribosomal protein S5 family protein	-2.22
AT1G08340	AT1G08340	rac GTPase activating protein, putative	-2.22
AT3G54400	AT3G54400	aspartyl protease family protein	-2.22
AT4G29360	AT4G29360	glycosyl hydrolase family 17 protein	-2.22
AT5G47980	AT5G47980	transferase family protein	-2.22
AT5G56220	AT5G56220	nucleoside-triphosphatase/ nucleotide binding	-2.22
AT3G20260	AT3G20260	structural constituent of ribosome	-2.22
AT3G46280	AT3G46280	protein kinase-related	-2.22
PME3	AT3G14310	ATPME3 (Arabidopsis thaliana pectin methylesterase 3)	-2.22
ACAT2	AT5G48230	ACAT2/EMB1276 (ACETOACETYL-COA THIOLASE 2); acetyl-CoA C-acetyltransferase	-2.22
AT2G37190	AT2G37190	60S ribosomal protein L12 (RPL12A)	-2.21
FLDH	AT4G33360	terpene cyclase/mutase-related	-2.21
AIR1	AT4G12550	AIR1 (Auxin-Induced in Root cultures 1); lipid binding	-2.21
ADAP	AT1G16060	ovule development protein, putative	-2.21
APT1	AT1G27450	APT1; adenine phosphoribosyltransferase	-2.21
AT3G08520	AT3G08520	[AT3G11120, 60S ribosomal protein L41 (RPL41E)];[AT3G56020, 60S ribosomal protein L41 (RPL41G)];[AT3G08520, 60S ribosomal protein L41 (RPL41D)]	-2.21
GUS3	AT5G34940	ATGUS3 (ARABIDOPSIS THALIANA GLUCURONIDASE 3); beta-glucuronidase	-2.21
AT5G06200	AT5G06200	integral membrane family protein	-2.20
ERD10	AT1G20450	ERD10/LTI45 (EARLY RESPONSIVE TO DEHYDRATION 10)	-2.20
AT5G16250	AT5G16250	similar to unknown protein [Arabidopsis thaliana] (TAIR:AT3G02640.1); similar to unnamed protein product [Vitis vinifera] (GB:CAO50168.1)	-2.20
RHS19	AT5G67400	peroxidase 73 (PER73) (P73) (PRXR11)	-2.20
IQD19	AT4G14750	IQD19 (IQ-DOMAIN 19); calmodulin binding	-2.20
PMSR2	AT5G07460	PMSR2 (PEPTIDEMETHIONINE SULFOXIDE REDUCTASE 2); peptide-methionine-(S)-S-oxide reductase	-2.20
MET1	AT5G49160	MET1 (DECREASED METHYLATION 2DNA)	-2.20
YUC3	AT1G04610	flavin-containing monooxygenase / FMO (YUCCA3)	-2.20
AT5G02450	AT5G02450	60S ribosomal protein L36 (RPL36C)	-2.20
AT1G33480	AT1G33480	protein binding / zinc ion binding	-2.20
PGY2	AT1G33140	60S ribosomal protein L9 (RPL90A/C)	-2.20
AT3G51350	AT3G51350	aspartyl protease family protein	-2.20
AT5G60760	AT5G60760	2-phosphoglycerate kinase-related	-2.19
CYP702A5	AT4G15393	CYP702A5 (cytochrome P450, family 702, subfamily A, polypeptide 5); heme binding / iron ion binding / monooxygenase	-2.19
AT1G76790	AT1G76790	O-methyltransferase family 2 protein	-2.19
AT3G11510	AT3G11510	40S ribosomal protein S14 (RPS14B)	-2.19
AT3G62370	AT3G62370	carbohydrate binding / catalytic	-2.19
G6PD3	AT1G24280	G6PD3 (GLUCOSE-6-PHOSPHATE DEHYDROGENASE 3); glucose-6-phosphate dehydrogenase	-2.19
BUBR1	AT2G33560	spindle checkpoint protein-related	-2.19
AT5G19760	AT5G19760	dicarboxylate/tricarboxylate carrier (DTC)	-2.19
AT5G50660	AT5G50660	[AT5G50660, similar to unknown protein [Arabidopsis thaliana] (TAIR:AT5G50560.1); similar to unnamed protein product [Vitis vinifera] (GB:CAO68311.1)];[AT5G50560, similar to unknown protein [Arabidopsis thaliana] (TAIR:AT5G50660.1); similar to unnamed protein product [Vitis vinifera] (GB:CAO68311.1)]	-2.19
AT5G53900	AT5G53900	similar to unknown protein [Arabidopsis thaliana] (TAIR:AT3G15240.2); similar to unnamed protein product [Vitis vinifera] (GB:CAO39314.1); contains domain PTHR13902:SF3 (PTHR13902:SF3); contains domain PTHR13902 (PTHR13902)	-2.19
AT4G18100	AT4G18100	60S ribosomal protein L32 (RPL32A)	-2.19
GS1	AT5G57440	GS1 (GLYCEROL-3-PHOSPHATASE 2); hydrolase	-2.18
AT2G20450	AT2G20450	60S ribosomal protein L14 (RPL14A)	-2.18
TUB6	AT5G12250	TUB6 (BETA-6 TUBULIN)	-2.18
CYP712A2	AT5G06905	CYP712A2 (cytochrome P450, family 712, subfamily A, polypeptide 2); oxygen binding	-2.18
AT3G18760	AT3G18760	ribosomal protein S6 family protein	-2.18
AT2G39390	AT2G39390	60S ribosomal protein L35 (RPL35B)	-2.18
PLP9	AT3G63200	PLA IIIB/PLP9 (Patatin-like protein 9); nutrient reservoir	-2.18
TIM10	AT2G29530	TIM10 (Arabidopsis thaliana translocase inner membrane subunit 10); P-P-bond-hydrolysis-driven protein transmembrane transporter	-2.18
AT2G41840	AT2G41840	40S ribosomal protein S2 (RPS2C)	-2.17
AT5G57700	AT5G57700	BNR/Asp-box repeat family protein	-2.17
AT3G59890	AT3G59890	dihydrodipicolinate reductase family protein	-2.17
AT3G49845	AT3G49845	contains InterPro domain XYPPX repeat (InterPro:IPR006031)	-2.17
AT1G48280	AT1G48280	hydroxyproline-rich glycoprotein family protein	-2.17
AT3G05910	AT3G05910	pectinacetylesterase, putative	-2.17
AT4G23670	AT4G23670	polyketide cyclase/dehydrase and lipid transport superfamily protein	-2.17
AT3G53890	AT3G53890	40S ribosomal protein S21 (RPS21B)	-2.17
AT3G09500	AT3G09500	60S ribosomal protein L35 (RPL35A)	-2.17
PPR596	AT1G80270	DNA-binding protein, putative	-2.17
HSP60-2	AT2G33210	chaperonin, putative	-2.17
AT2G47610	AT2G47610	60S ribosomal protein L7A (RPL7aA)	-2.17
AT5G10160	AT5G10160	beta-hydroxyacyl-ACP dehydratase, putative	-2.16
CDC45	AT3G25100	CDC45 (CELL DIVISION CYCLE 45)	-2.16
AT4G29390	AT4G29390	40S ribosomal protein S30 (RPS30B)	-2.16
AT1G72430	AT1G72430	auxin-responsive protein-related	-2.16
AT2G44040	AT2G44040	dihydrodipicolinate reductase family protein	-2.16
AT5G13980	AT5G13980	glycosyl hydrolase family 38 protein	-2.16
AT3G18600	AT3G18600	DEAD/DEAH box helicase, putative	-2.16
AT4G24275	AT4G24275	Identified as a screen for stress-responsive genes.	-2.16
AT3G54770	AT3G54770	RNA recognition motif (RRM)-containing protein	-2.16
RPS15A	AT1G07770	RPS15A (RIBOSOMAL PROTEIN S15A); structural constituent of ribosome	-2.15
AT4G35160	AT4G35160	O-methyltransferase family 2 protein	-2.15
AT4G29690	AT4G29690	type I phosphodiesterase/nucleotide pyrophosphatase family protein	-2.15
MRH6	AT2G03720	MRH6 (morphogenesis of root hair 6)	-2.15
AT4G01240	AT4G01240	similar to unknown protein [Arabidopsis thaliana] (TAIR:AT3G05390.1); similar to unnamed protein product [Vitis vinifera] (GB:CAO39658.1); contains domain SSF53335 (SSF53335)	-2.15
ACP1	AT3G05020	ACP1 (ACYL CARRIER PROTEIN 1)	-2.15
AT3G56370	AT3G56370	leucine-rich repeat transmembrane protein kinase, putative	-2.15
AT1G07070	AT1G07070	60S ribosomal protein L35a (RPL35aA)	-2.15
AT1G19600	AT1G19600	pfkB-type carbohydrate kinase family protein	-2.15
AXS2	AT1G08200	AXS2 (UDP-D-APIOSE/UDP-D-XYLOSE SYNTHASE 2)	-2.15
MCM2	AT1G44900	ATP binding / DNA binding / DNA-dependent ATPase	-2.14
AT5G62300	AT5G62300	40S ribosomal protein S20 (RPS20C)	-2.14
AT2G17080	AT2G17080	similar to unknown protein [Arabidopsis thaliana] (TAIR:AT2G17070.1); similar to CM0216.210.nc [Lotus japonicus] (GB:BAF98210.1); contains InterPro domain Protein of unknown function DUF241, plant (InterPro:IPR004320)	-2.14
UBC20	AT1G50490	UBC20 (UBIQUITIN-CONJUGATING ENZYME 20); ubiquitin-protein ligase	-2.14
AT5G20290	AT5G20290	40S ribosomal protein S8 (RPS8A)	-2.14
AT3G46320	AT3G46320	histone H4	-2.14
AT5G15520	AT5G15520	40S ribosomal protein S19 (RPS19B)	-2.14
AT3G28550	AT3G28550	proline-rich extensin-like family protein	-2.14
NDB1	AT4G28220	NDB1 (NAD(P)H DEHYDROGENASE B1); NADH dehydrogenase/ disulfide oxidoreductase	-2.14
SBT4.12	AT5G59090	[AT5G59120, ATSBT4.13; subtilase];[AT5G59090, ATSBT4.12; subtilase]	-2.14
AT3G14510	AT3G14510	[AT3G14550, GGPS3 (GERANYLGERANYL PYROPHOSPHATE SYNTHASE 3); farnesyltranstransferase];[AT3G14510, geranylgeranyl pyrophosphate synthase, putative / GGPP synthetase, putative / farnesyltranstransferase, putative]	-2.14
AT2G19730	AT2G19730	60S ribosomal protein L28 (RPL28A)	-2.14
RNR1	AT2G21790	R1/RNR1 (RIBONUCLEOTIDE REDUCTASE 1); ribonucleoside-diphosphate reductase	-2.13
AT3G58610	AT3G58610	ketol-acid reductoisomerase	-2.13
NFD6	AT2G20585	NFD6 (NUCLEAR FUSION DEFECTIVE 6)	-2.13
AT1G33080	AT1G33080	MATE efflux family protein	-2.13
MTHFR1	AT3G59970	MTHFR1 (METHYLENETETRAHYDROFOLATE REDUCTASE 1); methylenetetrahydrofolate reductase (NADPH)	-2.13
AT3G07010	AT3G07010	pectate lyase family protein	-2.13
AT4G24780	AT4G24780	pectate lyase family protein	-2.13
TUB5	AT1G20010	TUB5 (tubulin beta-5 chain)	-2.13
GH9B13	AT4G02290	ATGH9B13 (ARABIDOPSIS THALIANA GLYCOSYL HYDROLASE 9B13); hydrolase, hydrolyzing O-glycosyl compounds	-2.13
EXPA18	AT1G62980	ATEXPA18 (ARABIDOPSIS THALIANA EXPANSIN A18)	-2.12
AT1G17430	AT1G17430	hydrolase, alpha/beta fold family protein	-2.12
AT4G02090	AT4G02090	similar to unnamed protein product [Vitis vinifera] (GB:CAO40099.1)	-2.12
MAD2	AT3G25980	mitotic spindle checkpoint protein, putative (MAD2)	-2.12
AT3G06700	AT3G06700	60S ribosomal protein L29 (RPL29A)	-2.12
ENODL14	AT2G25060	plastocyanin-like domain-containing protein	-2.12
AT1G12080	AT1G12080	contains domain PTHR22683 (PTHR22683)	-2.12
AT5G47930	AT5G47930	40S ribosomal protein S27 (RPS27D)	-2.12
AT3G20390	AT3G20390	endoribonuclease L-PSP family protein	-2.11
AT4G33130	AT4G33130	similar to unknown protein [Arabidopsis thaliana] (TAIR:AT3G13000.2); similar to transcription factor [Arabidopsis thaliana] (TAIR:AT3G13000.1); similar to unnamed protein product [Vitis vinifera] (GB:CAO65161.1)	-2.11
GAD2	AT1G65960	GAD2 (GLUTAMATE DECARBOXYLASE 2); calmodulin binding	-2.11
AT5G02610	AT5G02610	60S ribosomal protein L35 (RPL35D)	-2.11
PROPEP4	AT5G09980	PROPEP4 (Elicitor peptide 4 precursor)	-2.11
NPG1	AT2G43040	NPG1 (NO POLLEN GERMINATION 1); calmodulin binding	-2.10
AT3G24830	AT3G24830	60S ribosomal protein L13A (RPL13aB)	-2.10
AT4G17100	AT4G17100	[AT4G17098, other RNA];[AT4G17100, serine protease protein -related, expressed pseudogene, blastp match of 64% identity and 1.9e-114 P-value to GP|29367523|gb|AAO72617.1||AY224498 putative serine protease-like protein {Oryza sativa (japonica cultivar-group)}]	-2.10
AT5G15725	AT5G15725	unknown protein	-2.10
LCD1	AT2G37860	LCD1 (LOWER CELL DENSITY 1)	-2.10
AT4G17280	AT4G17280	auxin-responsive family protein	-2.10
ATGSTF13	AT3G62760	ATGSTF13 (Arabidopsis thaliana Glutathione S-transferase (class phi) 13); glutathione transferase	-2.10
AT3G52630	AT3G52630	similar to unknown protein [Arabidopsis thaliana] (TAIR:AT4G18590.1); similar to unknown [Populus trichocarpa] (GB:ABK94610.1); contains InterPro domain Replication factor A protein 3 (InterPro:IPR013970); contains InterPro domain Nucleic acid-binding, OB-fold-like (InterPro:IPR016027)	-2.10
AT4G26220	AT4G26220	caffeoyl-CoA 3-O-methyltransferase, putative	-2.10
RP1	AT1G43170	ARP1 (ARABIDOPSIS RIBOSOMAL PROTEIN 1); structural constituent of ribosome	-2.10
AT1G67430	AT1G67430	60S ribosomal protein L17 (RPL17B)	-2.10
AT2G47670	AT2G47670	invertase/pectin methylesterase inhibitor family protein	-2.10
AT1G29250	AT1G29250	nucleic acid binding	-2.09
AT1G59359	AT1G59359	Ribosomal protein S5 family protein	-2.09
CKX4	AT4G29740	CKX4 (CYTOKININ OXIDASE 4); cytokinin dehydrogenase	-2.09
AT1G18540	AT1G18540	60S ribosomal protein L6 (RPL6A)	-2.09
AT3G09630	AT3G09630	60S ribosomal protein L4/L1 (RPL4A)	-2.09
AT2G24300	AT2G24300	calmodulin-binding protein	-2.09
AT1G04040	AT1G04040	[AT1G04030, similar to unknown protein [Arabidopsis thaliana] (TAIR:AT5G44040.1); similar to unnamed protein product [Vitis vinifera] (GB:CAO40580.1)];[AT1G04040, acid phosphatase class B family protein]	-2.09
AT5G17160	AT5G17160	similar to unknown protein [Arabidopsis thaliana] (TAIR:AT3G03130.1); similar to unnamed protein product [Vitis vinifera] (GB:CAO62214.1)	-2.09
mtACP2	AT1G65290	MTACP2 (MITOCHONDRIAL ACYL CARRIER PROTEIN 2); acyl carrier	-2.09
AT5G66230	AT5G66230	similar to unknown protein [Arabidopsis thaliana] (TAIR:AT3G51230.1); similar to unnamed protein product [Vitis vinifera] (GB:CAO48217.1)	-2.08
AT3G02560	AT3G02560	40S ribosomal protein S7 (RPS7B)	-2.08
AT1G07175	AT1G07175	similar to unknown protein [Arabidopsis thaliana] (TAIR:AT2G29995.1)	-2.08
VIM1	AT1G57820	[AT1G57820, ORTH2/VIM1 (VARIANT IN METHYLATION 1); DNA binding / chromatin binding / double-stranded methylated DNA binding / histone binding / methyl-CpG binding / methyl-CpNpG binding / methyl-CpNpN binding];[AT1G57800, VIM5 (VARIANT IN METHYLATION 5); protein binding / zinc ion binding]	-2.08
AT5G60930	AT5G60930	chromosome-associated kinesin, putative	-2.08
UBQ1	AT3G52590	UBQ1 (EARLY-RESPONSIVE TO DEHYDRATION 16, UBIQUITIN EXTENSION PROTEIN 1); protein binding	-2.08
MCM5	AT2G07690	minichromosome maintenance family protein / MCM family protein	-2.08
AT5G52650	AT5G52650	40S ribosomal protein S10 (RPS10C)	-2.08
AT5G15265	AT5G15265	unknown protein	-2.07
AT5G01890	AT5G01890	leucine-rich repeat transmembrane protein kinase, putative	-2.07
AT5G26290	AT5G26290	meprin and TRAF homology domain-containing protein / MATH domain-containing protein	-2.07
RPS15	AT1G04270	RPS15 (CYTOSOLIC RIBOSOMAL PROTEIN S15); structural constituent of ribosome	-2.07
KAS I	AT5G46290	KAS I (3-KETOACYL-ACYL CARRIER PROTEIN SYNTHASE I); fatty-acid synthase	-2.07
AT5G57290	AT5G57290	60S acidic ribosomal protein P3 (RPP3B)	-2.07
AT3G22620	AT3G22620	protease inhibitor/seed storage/lipid transfer protein (LTP) family protein	-2.07
AT5G10560	AT5G10560	glycosyl hydrolase family 3 protein	-2.07
AT1G73630	AT1G73630	calcium-binding protein, putative	-2.07
AT4G13720	AT4G13720	inosine triphosphate pyrophosphatase, putative / HAM1 family protein	-2.07
AT5G11890	AT5G11890	similar to unknown protein [Arabidopsis thaliana] (TAIR:AT1G17620.1); similar to unknown [Populus trichocarpa] (GB:ABK93997.1); contains InterPro domain Harpin-induced 1 (InterPro:IPR010847)	-2.06
ZIP2	AT5G59520	ZIP2 (ZINC TRANSPORTER 2 PRECURSOR); transferase, transferring glycosyl groups / zinc ion transmembrane transporter	-2.06
AT2G46890	AT2G46890	oxidoreductase, acting on the CH-CH group of donors	-2.06
AT3G18050	AT3G18050	similar to unknown protein [Arabidopsis thaliana] (TAIR:AT4G28100.1); similar to unknown [Populus trichocarpa] (GB:ABK95654.1)	-2.06
GATA12	AT5G25830	zinc finger (GATA type) family protein	-2.06
AT2G24400	AT2G24400	auxin-responsive protein, putative / small auxin up RNA (SAUR_D)	-2.06
AT3G61580	AT3G61580	delta-8 sphingolipid desaturase (SLD1)	-2.06
AT5G06930	AT5G06930	similar to nucleolar protein gar2-related [Arabidopsis thaliana] (TAIR:AT2G42320.1); similar to nucleolar protein gar2-related [Arabidopsis thaliana] (TAIR:AT2G42320.2); similar to unnamed protein product [Vitis vinifera] (GB:CAO23533.1)	-2.06
HIK	AT1G18370	HIK (HINKEL); microtubule motor	-2.06
UGT74B1	AT1G24100	UGT74B1 (UDP-glucosyl transferase 74B1); UDP-glycosyltransferase/ thiohydroximate beta-D-glucosyltransferase/ transferase, transferring glycosyl groups	-2.06
NPY4	AT2G23050	phototropic-responsive NPH3 family protein	-2.06
AT5G48760	AT5G48760	60S ribosomal protein L13A (RPL13aD)	-2.06
GSTU20	AT1G78370	ATGSTU20 (Arabidopsis thaliana Glutathione S-transferase (class tau) 20); glutathione transferase	-2.05
AT4G36180	AT4G36180	leucine-rich repeat family protein	-2.05
MUM2	AT5G63800	BGAL6/MUM2 (MUCILAGE-MODIFIED 2); beta-galactosidase	-2.05
FBL17	AT3G54650	F-box family protein (FBL17)	-2.05
AT3G01190	AT3G01190	peroxidase 27 (PER27) (P27) (PRXR7)	-2.05
AT5G17960	AT5G17960	DC1 domain-containing protein	-2.05
CAC2	AT5G35360	CAC2 (acetyl co-enzyme A carboxylase biotin carboxylase subunit)	-2.05
PAB8	AT1G49760	PAB8 (POLY(A) BINDING PROTEIN 8); RNA binding / translation initiation factor	-2.05
CYP705A30	AT3G20940	CYP705A30 (cytochrome P450, family 705, subfamily A, polypeptide 30); oxygen binding	-2.05
RPS28	AT5G64140	RPS28 (RIBOSOMAL PROTEIN S28); structural constituent of ribosome	-2.05
AT2G23540	AT2G23540	GDSL-motif lipase/hydrolase family protein	-2.04
AT1G43650	AT1G43650	integral membrane family protein / nodulin MtN21-related	-2.04
AT5G19510	AT5G19510	elongation factor 1B alpha-subunit 2 (eEF1Balpha2)	-2.04
AT5G52790	AT5G52790	CBS domain-containing protein-related	-2.04
DPE1	AT5G64860	DPE1 (DISPROPORTIONATING ENZYME); 4-alpha-glucanotransferase	-2.04
AT3G60770	AT3G60770	40S ribosomal protein S13 (RPS13A)	-2.04
CARAB-AK-LYS	AT5G14060	CARAB-AK-LYS (Lysine-sensitive aspartate kinase); amino acid binding / aspartate kinase	-2.04
AT4G35850	AT4G35850	pentatricopeptide (PPR) repeat-containing protein	-2.04
AT4G13440	AT4G13440	calcium-binding EF hand family protein	-2.04
AT1G33120	AT1G33120	60S ribosomal protein L9 (RPL90B)	-2.04
MLP28	AT1G70830	MLP28 (MLP-LIKE PROTEIN 28)	-2.03
AT3G54750	AT3G54750	similar to unnamed protein product [Vitis vinifera] (GB:CAO48944.1); contains domain PTHR12972 (PTHR12972)	-2.03
AT1G29660	AT1G29660	GDSL-motif lipase/hydrolase family protein	-2.03
GSTF10	AT2G30870	ATGSTF10 (EARLY DEHYDRATION-INDUCED 13); glutathione transferase	-2.03
AT5G66560	AT5G66560	[AT5G66558, other RNA];[AT5G66560, phototropic-responsive NPH3 family protein]	-2.03
CYP82F1	AT2G25160	CYP82F1 (cytochrome P450, family 82, subfamily F, polypeptide 1); oxygen binding	-2.03
AT3G27230	AT3G27230	similar to (ARABIDOPSIS THALIANA RAS ASSOCIATED WITH DIABETES PROTEIN 3), methyltransferase [Arabidopsis thaliana] (TAIR:AT5G40830.1); similar to (ARABIDOPSIS THALIANA RAS ASSOCIATED WITH DIABETES PROTEIN 3), methyltransferase [Arabidopsis thaliana] (TAIR:AT5G40830.2); similar to hypothetical protein [Prunus persica] (GB:AAO14627.1); contains domain SSF53335 (SSF53335)	-2.03
NPH3	AT5G64330	NPH3 (NON-PHOTOTROPIC HYPOCOTYL 3); signal transducer	-2.03
CLV1	AT1G75820	CLV1 (CLAVATA 1); ATP binding / kinase/ protein serine/threonine kinase	-2.03
FKBP15-1	AT3G25220	FKBP15-1 (FK506-binding protein 15 kD-1); FK506 binding / peptidyl-prolyl cis-trans isomerase	-2.02
AT1G64650	AT1G64650	similar to unknown protein [Arabidopsis thaliana] (TAIR:AT4G27720.1); similar to unknown protein [Arabidopsis thaliana] (TAIR:AT3G49310.1); similar to unknown [Populus trichocarpa] (GB:ABK93582.1); similar to unnamed protein product [Vitis vinifera] (GB:CAO48607.1); similar to unnamed protein product [Vitis vinifera] (GB:CAO62932.1); contains InterPro domain Protein of unknown function DUF791 (In…	-2.02
AT1G73160	AT1G73160	glycosyl transferase family 1 protein	-2.02
AT3G01810	AT3G01810	similar to nucleolar protein gar2-related [Arabidopsis thaliana] (TAIR:AT2G42320.1); similar to nucleolar protein gar2-related [Arabidopsis thaliana] (TAIR:AT2G42320.2); similar to unnamed protein product [Vitis vinifera] (GB:CAO46641.1); similar to unnamed protein product [Vitis vinifera] (GB:CAO14589.1)	-2.02
GR-RBP3	AT5G61030	GR-RBP3 (glycine-rich RNA-binding protein 3); RNA binding	-2.02
XTH15	AT4G14130	XYLOGLUCAN ENDOTRANSGLUCOSYLASE/HYDROLASE 15	-2.02
SMO1-2	AT4G22756	SMO1-2 (STEROL C4-METHYL OXIDASE); catalytic	-2.02
AT4G16447	AT4G16447	unknown protein	-2.01
AT5G04800	AT5G04800	40S ribosomal protein S17 (RPS17D)	-2.01
RXF12	AT1G58370	RXF12; hydrolase, hydrolyzing O-glycosyl compounds	-2.01
AT4G00880	AT4G00880	auxin-responsive family protein	-2.01
AT3G14530	AT3G14530	geranylgeranyl pyrophosphate synthase, putative / GGPP synthetase, putative / farnesyltranstransferase, putative	-2.01
UBQ6	AT2G47110	[AT2G47110, UBQ6 (ubiquitin 6); protein binding];[AT2G47115, similar to unknown protein [Arabidopsis thaliana] (TAIR:AT1G10660.3); similar to unknown protein [Arabidopsis thaliana] (TAIR:AT1G10660.1); similar to unknown protein [Arabidopsis thaliana] (TAIR:AT1G10660.4); similar to unnamed protein product [Vitis vinifera] (GB:CAO40183.1)]	-2.01
AT1G01100	AT1G01100	60S acidic ribosomal protein family	-2.01
AT3G04920	AT3G04920	40S ribosomal protein S24 (RPS24A)	-2.01
AT4G14310	AT4G14310	similar to hypothetical protein OsI_009189 [Oryza sativa (indica cultivar-group)] (GB:EAY87956.1); similar to hypothetical protein [Vitis vinifera] (GB:CAN71290.1); similar to unnamed protein product [Vitis vinifera] (GB:CAO71438.1); contains InterPro domain WD40 repeat-like (InterPro:IPR011046)	-2.01
LRR1	AT5G16590	leucine-rich repeat transmembrane protein kinase, putative	-2.01
AT5G37790	AT5G37790	protein kinase family protein	-2.01
PMH1	AT3G22310	PMH1 (PUTATIVE MITOCHONDRIAL RNA HELICASE 1); ATP-dependent helicase	-2.01
AT5G03670	AT5G03670	similar to unknown protein [Arabidopsis thaliana] (TAIR:AT2G36420.1); similar to unnamed protein product [Vitis vinifera] (GB:CAO15955.1)	-2.01
SNRK2.5	AT5G63650	SNRK2-5/SNRK2.5/SRK2H (SNF1-RELATED PROTEIN KINASE 2.5); kinase	-2.01
AT4G18060	AT4G18060	SH3 domain-containing protein 3 (SH3P3)	-2.01
AT5G11420	AT5G11420	similar to unknown protein [Arabidopsis thaliana] (TAIR:AT5G25460.1); similar to unknown [Ricinus communis] (GB:CAB02653.1); contains InterPro domain Protein of unknown function DUF642 (InterPro:IPR006946); contains InterPro domain Galactose-binding like (InterPro:IPR008979)	-2.01
AT3G14190	AT3G14190	similar to unknown protein [Arabidopsis thaliana] (TAIR:AT5G12360.1)	-2.00
AT4G02800	AT4G02800	similar to unknown protein [Arabidopsis thaliana] (TAIR:AT1G30050.1); similar to Os04g0228100 [Oryza sativa (japonica cultivar-group)] (GB:NP_001052288.1); similar to H0209A05.2 [Oryza sativa (indica cultivar-group)] (GB:CAH66085.1)	-2.00
NDPK1	AT4G09320	NDPK1 (nucleoside diphosphate kinase 1); ATP binding / nucleoside diphosphate kinase	-2.00
AT5G19250	AT5G19250	Identical to Uncharacterized GPI-anchored protein At5g19250 precursor [Arabidopsis Thaliana] (GB:P59833;GB:Q67ZQ2;GB:Q6ID89); similar to unknown protein [Arabidopsis thaliana] (TAIR:AT3G06035.1); similar to unknown [Populus trichocarpa] (GB:ABK94712.1)	-2.00
AT5G10920	AT5G10920	argininosuccinate lyase, putative / arginosuccinase, putative	-2.00
MK	AT5G27450	MK/MVK; mevalonate kinase	-2.00
SHY2	AT1G04240	SHY2 (SHORT HYPOCOTYL 2); transcription factor	-1.99
AT4G23820	AT4G23820	glycoside hydrolase family 28 protein / polygalacturonase (pectinase) family protein	-1.99
AT1G08360	AT1G08360	60S ribosomal protein L10A (RPL10aA)	-1.99
AT1G24485	AT1G24485	similar to protein kinase-related [Arabidopsis thaliana] (TAIR:AT3G46280.1); similar to unnamed protein product [Vitis vinifera] (GB:CAO21739.1)	-1.99
EXPA9	AT5G02260	ATEXPA9 (ARABIDOPSIS THALIANA EXPANSIN A9)	-1.99
AT1G52930	AT1G52930	brix domain-containing protein	-1.99
MVD1	AT2G38700	MVD1 (mevalonate diphosphate decarboxylase 1)	-1.99
AT1G34030	AT1G34030	40S ribosomal protein S18 (RPS18B)	-1.98
AT2G34020	AT2G34020	calcium ion binding	-1.98
TBL21	AT5G15890	similar to unknown protein [Arabidopsis thaliana] (TAIR:AT5G15900.1); similar to hypothetical protein [Cleome spinosa] (GB:ABD96865.1); contains InterPro domain Protein of unknown function DUF231, plant (InterPro:IPR004253)	-1.98
AT1G34040	AT1G34040	alliinase family protein	-1.98
XTH21	AT2G18800	xyloglucan:xyloglucosyl transferase, putative / xyloglucan endotransglycosylase, putative / endo-xyloglucan transferase, putative	-1.98
AT5G14330	AT5G14330	unknown protein	-1.98
GH9B1	AT1G70710	AtGH9B1 (ARABIDOPSIS THALIANA GLYCOSYL HYDROLASE 9B1); hydrolase, hydrolyzing O-glycosyl compounds	-1.98
AT4G11610	AT4G11610	C2 domain-containing protein	-1.98
EB1C	AT5G67270	ATEB1C (MICROTUBULE END BINDING PROTEIN 1); microtubule binding	-1.98
AT5G52840	AT5G52840	NADH-ubiquinone oxidoreductase-related	-1.98
AT3G08600	AT3G08600	similar to unknown protein [Arabidopsis thaliana] (TAIR:AT4G22900.1); similar to unnamed protein product [Vitis vinifera] (GB:CAO45372.1); contains InterPro domain Protein of unknown function DUF1191 (InterPro:IPR010605)	-1.98
RGF3	AT2G04025	similar to unknown protein [Arabidopsis thaliana] (TAIR:AT1G13620.1)	-1.98
AT1G14810	AT1G14810	semialdehyde dehydrogenase family protein	-1.98
AT5G53090	AT5G53090	oxidoreductase	-1.98
DRP5A	AT1G53140	dynamin family protein	-1.98
FSD1	AT4G25100	FSD1 (FE SUPEROXIDE DISMUTASE 1); iron superoxide dismutase	-1.98
AT4G20230	AT4G20230	terpene synthase/cyclase family protein	-1.98
AT4G37660	AT4G37660	ribosomal protein L12 family protein	-1.97
AT3G58660	AT3G58660	60S ribosomal protein-related	-1.97
AT1G51800	AT1G51800	leucine-rich repeat protein kinase, putative	-1.97
AT5G01340	AT5G01340	mitochondrial substrate carrier family protein	-1.97
BGAL8	AT2G28470	BGAL8 (BETA-GALACTOSIDASE 8); beta-galactosidase	-1.97
DUT1	AT3G46940	deoxyuridine 5'-triphosphate nucleotidohydrolase family	-1.97
BSK2	AT5G46570	protein kinase family protein	-1.97
F8H	AT5G22940	exostosin family protein	-1.97
ACR4	AT1G69040	ACR4 (ACT REPEAT 4); amino acid binding	-1.97
AT1G13750	AT1G13750	calcineurin-like phosphoesterase family protein	-1.97
AT2G20080	AT2G20080	similar to unknown protein [Arabidopsis thaliana] (TAIR:AT4G28840.1); similar to unnamed protein product [Vitis vinifera] (GB:CAO65485.1)	-1.97
SBH2	AT1G14290	acid phosphatase, putative	-1.96
TBL34	AT2G38320	similar to unknown protein [Arabidopsis thaliana] (TAIR:AT5G01620.2); similar to unknown protein [Arabidopsis thaliana] (TAIR:AT5G01620.1); similar to unnamed protein product [Vitis vinifera] (GB:CAO48779.1); contains InterPro domain Protein of unknown function DUF231, plant (InterPro:IPR004253)	-1.96
AT1G63660	AT1G63660	GMP synthase (glutamine-hydrolyzing), putative / glutamine amidotransferase, putative	-1.96
AT2G37600	AT2G37600	60S ribosomal protein L36 (RPL36A)	-1.96
AT3G14600	AT3G14600	60S ribosomal protein L18A (RPL18aC)	-1.96
AT5G03850	AT5G03850	40S ribosomal protein S28 (RPS28B)	-1.96
AT2G15000	AT2G15000	similar to unknown protein [Arabidopsis thaliana] (TAIR:AT4G34265.2); similar to unnamed protein product [Vitis vinifera] (GB:CAO70855.1)	-1.96
AT5G12470	AT5G12470	similar to unknown protein [Arabidopsis thaliana] (TAIR:AT2G40400.2); similar to unknown protein [Arabidopsis thaliana] (TAIR:AT2G40400.1); similar to unnamed protein product [Vitis vinifera] (GB:CAO21888.1)	-1.96
sks16	AT2G23630	SKS16 (SKU5 Similar 16); copper ion binding / pectinesterase	-1.96
FPS1	AT5G47770	FPS1 (FARNESYL DIPHOSPHATE SYNTHASE 1); dimethylallyltranstransferase/ geranyltranstransferase	-1.96
ADH1	AT1G77120	ADH1 (ALCOHOL DEHYDROGENASE 1)	-1.96
AT5G58784	AT5G58784	dehydrodolichyl diphosphate synthase, putative / DEDOL-PP synthase, putative	-1.96
ROXY2	AT5G14070	ROXY2; thiol-disulfide exchange intermediate	-1.96
AT3G45850	AT3G45850	kinesin motor protein-related	-1.96
AT1G02575	AT1G02570	similar to unknown protein [Arabidopsis thaliana] (TAIR:AT2G47360.1); similar to unnamed protein product [Vitis vinifera] (GB:CAO40120.1)	-1.95
AT2G41650	AT2G41650	unknown protein	-1.95
AT2G31670	AT2G31670	similar to unknown protein [Arabidopsis thaliana] (TAIR:AT1G51360.1); similar to unknown [Populus trichocarpa] (GB:ABK93857.1); contains InterPro domain Dimeric alpha-beta barrel (InterPro:IPR011008); contains InterPro domain Stress responsive alpha-beta barrel (InterPro:IPR013097)	-1.95
PIP1;5	AT4G23400	PIP1;5/PIP1D (plasma membrane intrinsic protein 1;5); water channel	-1.95
SMT2	AT1G20330	SMT2 (STEROL METHYLTRANSFERASE 2)	-1.95
AT2G43590	AT2G43590	chitinase, putative	-1.95
CMT3	AT1G69770	CMT3 (CHROMOMETHYLASE 3)	-1.95
AT2G24980	AT2G24980	[AT2G24980, proline-rich extensin-like family protein];[AT1G23720, proline-rich extensin-like family protein]	-1.95
PCNA1	AT1G07370	PCNA1 (PROLIFERATING CELLULAR NUCLEAR ANTIGEN); DNA binding / DNA polymerase processivity factor	-1.94
AT2G27720	AT2G27720	60S acidic ribosomal protein P2 (RPP2A)	-1.94
AT5G43640	AT5G43640	40S ribosomal protein S15 (RPS15E)	-1.94
AT2G47140	AT2G47140	short-chain dehydrogenase/reductase (SDR) family protein	-1.94
AT3G22540	AT3G22540	similar to unknown protein [Arabidopsis thaliana] (TAIR:AT4G14819.1); similar to unnamed protein product [Vitis vinifera] (GB:CAO71190.1); contains InterPro domain Protein of unknown function DUF1677, plant (InterPro:IPR012876)	-1.94
AT4G27090	AT4G27090	60S ribosomal protein L14 (RPL14B)	-1.94
CXE5	AT1G49660	ATCXE5 (ARABIDOPSIS THALIANA CARBOXYESTERASE 5); carboxylesterase	-1.94
AT1G12845	AT1G12845	similar to hypothetical protein MtrDRAFT_AC149131g9v2 [Medicago truncatula] (GB:ABD32556.1)	-1.94
UPM1	AT5G40850	[AT5G40850, UPM1 (UROPHORPHYRIN METHYLASE 1); uroporphyrin-III C-methyltransferase];[AT3G30415, pseudogene, putative urophorphyrin III methylase, blastp match of 80% identity and 2.7e-49 P-value to GP|20161485|dbj|BAB90408.1||AP003681 uroporphyrin-III C-methyltransferase-like protein {Oryza sativa (japonica cultivar-group)}]	-1.94
CSLD5	AT1G02730	ATCSLD5 (CELLULOSE SYNTHASE-LIKE D5); 1,4-beta-D-xylan synthase/ cellulose synthase	-1.94
RER1	AT5G22790	RER1 (RETICULATA-RELATED 1)	-1.94
AT3G57490	AT3G57490	40S ribosomal protein S2 (RPS2D)	-1.94
IIL1	AT4G13430	aconitase family protein / aconitate hydratase family protein	-1.94
AT2G31610	AT2G31610	[AT3G53870, 40S ribosomal protein S3 (RPS3B)];[AT2G31610, 40S ribosomal protein S3 (RPS3A)]	-1.93
AT5G10830	AT5G10830	embryo-abundant protein-related	-1.93
AT4G32710	AT4G32710	kinase	-1.93
AT5G12050	AT5G12050	similar to unnamed protein product [Vitis vinifera] (GB:CAO45643.1)	-1.93
C/VIF2	AT5G64620	C/VIF2 (CELL WALL / VACUOLAR INHIBITOR OF FRUCTOSIDASE 2); pectinesterase inhibitor	-1.93
AT3G23190	AT3G23190	lesion inducing protein-related	-1.93
AT1G16850	AT1G16850	unknown protein	-1.93
SPDS2	AT1G70310	SPDS2 (SPERMIDINE SYNTHASE 2)	-1.93
AT1G64910	AT1G64910	glycosyltransferase family protein	-1.93
AT1G10810	AT1G10810	aldo/keto reductase family protein	-1.92
AT5G66580	AT5G66580	similar to unknown protein [Arabidopsis thaliana] (TAIR:AT3G50800.1); similar to unnamed protein product [Vitis vinifera] (GB:CAO41608.1); similar to unnamed protein product [Vitis vinifera] (GB:CAO45438.1); similar to hypothetical protein [Vitis vinifera] (GB:CAN61825.1)	-1.92
AT5G20635	AT5G20635	receptor	-1.92
BCAT4	AT3G19710	BCAT4 (BRANCHED-CHAIN AMINOTRANSFERASE4); catalytic/ methionine-oxo-acid transaminase	-1.92
AT5G08670	AT5G08670	ATP synthase beta chain 1, mitochondrial	-1.92
mMDH2	AT3G15020	malate dehydrogenase (NAD), mitochondrial, putative	-1.92
PYR1	AT4G17870	similar to unknown protein [Arabidopsis thaliana] (TAIR:AT5G46790.1); similar to Streptomyces cyclase/dehydrase family protein [Brassica oleracea] (GB:ABD65175.1); contains InterPro domain Streptomyces cyclase/dehydrase (InterPro:IPR005031)	-1.92
AT2G04850	AT2G04850	auxin-responsive protein-related	-1.92
AT4G27400	AT4G27400	late embryogenesis abundant protein-related / LEA protein-related	-1.92
AT2G40475	AT2G40475	unknown protein	-1.92
DEL3	AT3G01330	DEL3 (DP-E2F-like 3); transcription factor	-1.92
AT2G27740	AT2G27740	similar to unknown protein [Arabidopsis thaliana] (TAIR:AT2G36410.2); similar to unnamed protein product [Vitis vinifera] (GB:CAO16676.1); contains InterPro domain Protein of unknown function DUF662 (InterPro:IPR007033)	-1.92
AMP1	AT3G54720	AMP1 (ALTERED MERISTEM PROGRAM 1); dipeptidase	-1.92
scpl35	AT5G08260	SCPL35 (serine carboxypeptidase-like 35); serine carboxypeptidase	-1.91
AT4G27490	AT4G27490	3' exoribonuclease family domain 1-containing protein	-1.91
AT4G26960	AT4G26960	similar to unknown protein [Arabidopsis thaliana] (TAIR:AT5G54970.1)	-1.91
AT1G77670	AT1G77670	aminotransferase class I and II family protein	-1.91
CRF2	AT4G23750	CRF2 (CYTOKININ RESPONSE FACTOR 2); DNA binding / transcription factor	-1.91
PGY1	AT2G27530	60S ribosomal protein L10A (RPL10aB)	-1.91
EXT3	AT1G21310	ATEXT3 (EXTENSIN 3); structural constituent of cell wall	-1.91
AT3G09200	AT3G09200	60S acidic ribosomal protein P0 (RPP0B)	-1.91
SUR1	AT2G20610	SUR1 (SUPERROOT 1); transaminase	-1.91
AT5G12910	AT5G12910	histone H3, putative	-1.91
AT3G49190	AT3G49190	condensation domain-containing protein	-1.91
AT2G04280	AT2G04280	[AT2G04280, similar to unknown protein [Arabidopsis thaliana] (TAIR:AT4G12700.1); similar to Os10g0456400 [Oryza sativa (japonica cultivar-group)] (GB:NP_001064754.1); similar to unnamed protein product [Vitis vinifera] (GB:CAO41132.1)];[AT2G04270, glycoside hydrolase starch-binding domain-containing protein]	-1.91
CYP87A2	AT1G12740	CYP87A2 (cytochrome P450, family 87, subfamily A, polypeptide 2); oxygen binding	-1.91
AT4G01040	AT4G01040	glycosyl hydrolase family 18 protein	-1.90
AT4G34670	AT4G34670	40S ribosomal protein S3A (RPS3aB)	-1.90
AT5G36710	AT5G36710	[AT5G36800, similar to unknown protein [Arabidopsis thaliana] (TAIR:AT5G36710.1); similar to unknown [Brassica rapa] (GB:ABL97950.1); contains domain PROKAR_LIPOPROTEIN (PS51257)];[AT5G36710, similar to unknown protein [Arabidopsis thaliana] (TAIR:AT5G36800.1); similar to unknown [Brassica rapa] (GB:ABL97950.1); contains domain PROKAR_LIPOPROTEIN (PS51257)]	-1.90
AT4G22460	AT4G22460	protease inhibitor/seed storage/lipid transfer protein (LTP) family protein	-1.90
AT5G02050	AT5G02050	mitochondrial glycoprotein family protein / MAM33 family protein	-1.90
AT1G15930	AT1G15930	40S ribosomal protein S12 (RPS12A)	-1.90
AT5G50560	AT5G50560	[AT5G50660, similar to unknown protein [Arabidopsis thaliana] (TAIR:AT5G50560.1); similar to unnamed protein product [Vitis vinifera] (GB:CAO68311.1)];[AT5G50560, similar to unknown protein [Arabidopsis thaliana] (TAIR:AT5G50660.1); similar to unnamed protein product [Vitis vinifera] (GB:CAO68311.1)]	-1.90
NAP57	AT3G57150	HOMOLOGUE OF NAP57	-1.90
AT5G27770	AT5G27770	60S ribosomal protein L22 (RPL22C)	-1.90
SRF8	AT4G22130	SRF8 (STRUBBELIG-RECEPTOR FAMILY 8); kinase	-1.90
AT5G07040	AT5G07040	zinc finger (C3HC4-type RING finger) family protein	-1.89
UXS4	AT2G47650	UXS4 (UDP-XYLOSE SYNTHASE 4); catalytic	-1.89
AT5G55520	AT5G55520	similar to unknown protein [Arabidopsis thaliana] (TAIR:AT4G26660.1); similar to unnamed protein product [Vitis vinifera] (GB:CAO38858.1); contains InterPro domain Kinesin-related (InterPro:IPR010544)	-1.89
AT5G59690	AT5G59690	histone superfamily protein	-1.89
AT5G50370	AT5G50370	adenylate kinase, putative	-1.89
AT1G05205	AT1G05205	similar to hypothetical protein OsJ_021517 [Oryza sativa (japonica cultivar-group)] (GB:EAZ38034.1); similar to unknown protein [Oryza sativa (japonica cultivar-group)] (GB:BAD45491.1); similar to hypothetical protein OsI_023333 [Oryza sativa (indica cultivar-group)] (GB:EAZ02101.1)	-1.89
CSLA02	AT5G22740	ATCSLA02 (Cellulose synthase-like A2); transferase, transferring glycosyl groups	-1.89
NAC070	AT4G10350	ANAC070 (Arabidopsis NAC domain containing protein 70); transcription factor	-1.89
TPS5	AT4G17770	ATTPS5 (Arabidopsis thaliana trehalose phosphatase/synthase 5); transferase, transferring glycosyl groups / trehalose-phosphatase	-1.89
AT5G14610	AT5G14610	ATP binding / ATP-dependent helicase	-1.89
AT3G07900	AT3G07900	similar to unknown protein [Arabidopsis thaliana] (TAIR:AT2G44500.1); similar to unnamed protein product [Vitis vinifera] (GB:CAO15104.1); contains InterPro domain Protein of unknown function DUF246, plant (InterPro:IPR004348)	-1.88
NSP3	AT3G16390	jacalin lectin family protein	-1.88
AT3G02080	AT3G02080	40S ribosomal protein S19 (RPS19A)	-1.88
AT2G34560	AT2G34560	katanin, putative	-1.88
AT2G03260	AT2G03260	EXS family protein / ERD1/XPR1/SYG1 family protein	-1.88
SMT3	AT1G76090	SMT3 (S-adenosyl-methionine-sterol-C-methyltransferase 3); S-adenosylmethionine-dependent methyltransferase	-1.88
AT5G62580	AT5G62580	binding	-1.88
AT4G34555	AT4G34555	40S ribosomal protein S25, putative	-1.88
AT1G17350	AT1G17350	auxin-induced-related / indole-3-acetic acid induced-related	-1.88
AT1G64190	AT1G64190	6-phosphogluconate dehydrogenase family protein	-1.88
ZIP3	AT2G32270	ZIP3 (ZINC TRANSPORTER 3 PRECURSOR); zinc ion transmembrane transporter	-1.88
AT5G42860	AT5G42860	similar to unknown protein [Arabidopsis thaliana] (TAIR:AT1G45688.1); similar to H0814G11.12 [Oryza sativa (indica cultivar-group)] (GB:CAJ86345.1); similar to CAA30379.1 protein [Oryza sativa] (GB:CAB53482.1)	-1.88
AT1G53290	AT1G53290	galactosyltransferase family protein	-1.88
AT4G21570	AT4G21570	similar to unknown protein [Arabidopsis thaliana] (TAIR:AT1G11200.1); similar to hypothetical protein [Vitis vinifera] (GB:CAN61223.1); contains InterPro domain Protein of unknown function DUF300 (InterPro:IPR005178)	-1.88
AT1G20380	AT1G20380	prolyl oligopeptidase, putative / prolyl endopeptidase, putative / post-proline cleaving enzyme, putative	-1.88
AT2G17360	AT2G17360	40S ribosomal protein S4 (RPS4A)	-1.88
AT1G15410	AT1G15410	aspartate-glutamate racemase family	-1.88
AT5G13100	AT5G13100	oxidoreductase	-1.88
IQD11	AT5G13460	IQD11 (IQ-domain 11); calmodulin binding	-1.88
AT3G59650	AT3G59650	mitochondrial ribosomal protein L51/S25/CI-B8 family protein	-1.87
YSL4	AT5G41000	YSL4 (YELLOW STRIPE LIKE 4); oligopeptide transporter	-1.87
AT5G07475	AT5G07475	plastocyanin-like domain-containing protein	-1.87
HVA22C	AT1G69700	ATHVA22C (Arabidopsis thaliana HVA22 homologue C)	-1.87
AT4G22235	AT4G22235	Encodes a defensin-like (DEFL) family protein.	-1.87
AT5G26670	AT5G26670	pectinacetylesterase, putative	-1.87
GAMMA-TIP	AT2G36830	encodes a tonoplast intrinsic protein	-1.87
AT1G38131	AT1G38131	[AT1G38065, similar to unknown protein [Arabidopsis thaliana] (TAIR:AT1G38131.1); similar to unnamed protein product [Vitis vinifera] (GB:CAO61813.1); contains InterPro domain Protein of unknown function DUF246, plant (InterPro:IPR004348)];[AT1G38131, similar to unknown protein [Arabidopsis thaliana] (TAIR:AT1G38065.1); similar to unnamed protein product [Vitis vinifera] (GB:CAO61813.1); contains…	-1.87
AT3G06680	AT3G06680	60S ribosomal protein L29 (RPL29B)	-1.87
AT5G28060	AT5G28060	40S ribosomal protein S24 (RPS24B)	-1.87
AT3G10080	AT3G10080	germin-like protein, putative	-1.87
AT1G78850	AT1G78850	curculin-like (mannose-binding) lectin family protein	-1.87
AT1G79470	AT1G79470	inosine-5'-monophosphate dehydrogenase	-1.87
AT3G23450	AT3G23450	pseudogene, similar to unnamed protein product, blastp match of 19% identity and 2.8e-15 P-value to GP|28802461|emb|CAD70027.1||AX647825 unnamed protein product {Homo sapiens}	-1.87
AT3G13230	AT3G13230	RNA binding	-1.86
AT1G52750	AT1G52750	hydrolase, alpha/beta fold family protein	-1.86
AT3G58700	AT3G58700	60S ribosomal protein L11 (RPL11B)	-1.86
SLP2	AT4G34980	SLP2 (subtilisin-like serine protease 2); subtilase	-1.86
AT3G02820	AT3G02820	zinc knuckle (CCHC-type) family protein	-1.86
AT1G20310	AT1G20310	similar to unknown protein [Arabidopsis thaliana] (TAIR:AT1G76070.1); similar to hypothetical protein [Vitis vinifera] (GB:CAN83887.1)	-1.86
AT3G24450	AT3G24450	copper-binding family protein	-1.86
AT1G22030	AT1G22030	similar to unknown protein [Arabidopsis thaliana] (TAIR:AT1G77855.1); similar to unnamed protein product [Vitis vinifera] (GB:CAO61782.1)	-1.86
AT2G44940	AT2G44940	AP2 domain-containing transcription factor TINY, putative	-1.86
AT2G44060	AT2G44060	late embryogenesis abundant family protein / LEA family protein	-1.86
AT1G63100	AT1G63100	scarecrow transcription factor family protein	-1.86
PCNA2	AT2G29570	PCNA2 (PROLIFERATING CELL NUCLEAR ANTIGEN 2); DNA binding / DNA polymerase processivity factor	-1.86
AT1G51940	AT1G51940	protein kinase family protein / peptidoglycan-binding LysM domain-containing protein	-1.86
ATG2	AT3G51800	ATG2 (G2p-related protein); metalloexopeptidase	-1.86
FLA16	AT2G35860	FLA16 (FASCICLIN-LIKE ARABINOGALACTAN PROTEIN 16 PRECURSOR)	-1.86
AT3G02720	AT3G02720	DJ-1 family protein / protease-related	-1.86
AT3G51230	AT3G51230	similar to unknown protein [Arabidopsis thaliana] (TAIR:AT5G66230.1); similar to unnamed protein product [Vitis vinifera] (GB:CAO48217.1)	-1.86
TUA6	AT4G14960	TUA6 (tubulin alpha-6 chiain)	-1.86
AT5G45290	AT5G45290	zinc finger (C3HC4-type RING finger) family protein	-1.85
MTO3	AT3G17390	MTO3 (S-adenosylmethionine synthase 3); methionine adenosyltransferase	-1.85
ROPGEF1	AT4G38430	ATROPGEF1/ROPGEF1 (KINASE PARTNER PROTEIN-LIKE); Rho guanyl-nucleotide exchange factor/ protein binding	-1.85
HB2	AT3G10520	AHB2 (NON-SYMBIOTIC HAEMOGLOBIN 2)	-1.85
AT2G30200	AT2G30200	[acyl-carrier-protein] S-malonyltransferase/ binding / catalytic/ transferase	-1.85
ENODL13	AT5G25090	plastocyanin-like domain-containing protein	-1.85
AT2G19750	AT2G19750	40S ribosomal protein S30 (RPS30A)	-1.85
AT1G74270	AT1G74270	60S ribosomal protein L35a (RPL35aC)	-1.85
MAT3	AT2G36880	MAT3 (METHIONINE ADENOSYLTRANSFERASE 3); methionine adenosyltransferase	-1.85
PPa1	AT1G01050	ATPPA1 (ARABIDOPSIS THALIANA PYROPHOSPHORYLASE 1); inorganic diphosphatase/ pyrophosphatase	-1.85
AGP41	AT5G24105	AGP41	-1.85
MIPS1	AT4G39800	MI-1-P SYNTHASE (Myo-inositol-1-phosphate synthase); inositol-3-phosphate synthase	-1.85
XW6	AT1G58380	structural constituent of ribosome	-1.85
ARR9	AT3G57040	ARR9 (RESPONSE REACTOR 4); transcription regulator	-1.85
AT4G20210	AT4G20210	terpene synthase/cyclase family protein	-1.84
AT5G23910	AT5G23910	microtubule motor	-1.84
ASN2	AT5G65010	ASN2 (ASPARAGINE SYNTHETASE 2); asparagine synthase (glutamine-hydrolyzing)	-1.84
AT5G62720	AT5G62720	integral membrane HPP family protein	-1.84
AT3G17120	AT3G17120	similar to unknown protein [Arabidopsis thaliana] (TAIR:AT4G01960.1); similar to hypothetical protein MtrDRAFT_AC173289g6v1 [Medicago truncatula] (GB:ABN09095.1)	-1.84
THE1	AT5G54380	THE1 (THESEUS1); kinase/ protein kinase	-1.84
AT1G48830	AT1G48830	40S ribosomal protein S7 (RPS7A)	-1.84
CDKB2;1	AT1G76540	CDKB2;1 (CYCLIN-DEPENDENT KINASE B2;1); kinase	-1.84
AT5G67510	AT5G67510	60S ribosomal protein L26 (RPL26B)	-1.84
WNK3	AT3G48260	WNK3 (Arabidopsis WNK kinase 3); kinase	-1.84
AT2G43550	AT2G43550	trypsin inhibitor, putative	-1.84
AT4G33865	AT4G33865	40S ribosomal protein S29 (RPS29C)	-1.83
MAP70-5	AT4G17220	ATMAP70-5 (microtubule-associated proteins 70-5); microtubule binding	-1.83
AT3G60210	AT3G60210	chloroplast chaperonin 10, putative	-1.83
AT3G51010	AT3G51010	similar to hypothetical protein [Vitis vinifera] (GB:CAN73508.1)	-1.83
AGD2	AT4G33680	AGD2 (ABERRANT GROWTH AND DEATH 2); transaminase	-1.83
RPA70D	AT5G61000	replication protein, putative	-1.83
AT3G49810	AT3G49810	U-box domain-containing protein	-1.83
CPN10	AT1G14980	CPN10 (CHAPERONIN 10)	-1.83
AT1G60010	AT1G60010	similar to unknown protein [Arabidopsis thaliana] (TAIR:AT1G10530.1); similar to unnamed protein product [Vitis vinifera] (GB:CAO40951.1)	-1.83
AT3G26460	AT3G26460	major latex protein-related / MLP-related	-1.83
HB-3	AT5G15150	ATHB-3 (ARABIDOPSIS THALIANA HOMEOBOX 3); DNA binding / transcription factor	-1.83
UGP1	AT3G03250	UGP (UDP-glucose pyrophosphorylase); UTP:glucose-1-phosphate uridylyltransferase	-1.83
AT2G43880	AT2G43880	polygalacturonase, putative / pectinase, putative	-1.83
AT5G09760	AT5G09760	pectinesterase family protein	-1.83
AT1G73580	AT1G73580	C2 domain-containing protein	-1.83
AT1G07795	AT1G07795	similar to unknown protein [Arabidopsis thaliana] (TAIR:AT2G28725.1); similar to hypothetical protein [Vitis vinifera] (GB:CAN76818.1)	-1.83
AT2G16980	AT2G16980	tetracycline transporter	-1.82
AT4G16450	AT4G16450	similar to unknown [Populus trichocarpa] (GB:ABK93272.1); contains domain PD104546 (PD104546)	-1.82
PMM	AT2G45790	ATPMM; phosphomannomutase	-1.82
SCPL45	AT1G28110	SCPL45; serine carboxypeptidase	-1.82
AT2G36290	AT2G36290	hydrolase, alpha/beta fold family protein	-1.82
ICU2	AT5G67100	ICU2 (INCURVATA2); DNA-directed DNA polymerase	-1.82
TSO2	AT3G27060	TSO2 (TSO MEANING 'UGLY' IN CHINESE); ribonucleoside-diphosphate reductase	-1.82
ASF1B	AT5G38110	ASF1B/SGA01/SGA1 (ANTI- SILENCING FUNCTION 1B)	-1.82
ROPGEF4	AT2G45890	ATROPGEF4/ROPGEF4 (KINASE PARTNER PROTEIN-LIKE); Rho guanyl-nucleotide exchange factor/	-1.82
HMT-1	AT3G25900	ATHMT-1/HMT-1; homocysteine S-methyltransferase	-1.82
AT1G80750	AT1G80750	60S ribosomal protein L7 (RPL7A)	-1.82
AT3G18490	AT3G18490	aspartyl protease family protein	-1.82
CYP71A27	AT4G20240	(cytochrome P450, family 71, subfamily A, polypeptide 27); oxygen binding	-1.82
ENODL15	AT4G31840	plastocyanin-like domain-containing protein	-1.82
AT3G60750	AT3G60750	transketolase, putative	-1.82
AT1G22550	AT1G22550	proton-dependent oligopeptide transport (POT) family protein	-1.82
LGT9	AT1G24170	GATL8/LGT9 (Galacturonosyltransferase-like 8); polygalacturonate 4-alpha-galacturonosyltransferase/ transferase, transferring glycosyl groups / transferase, transferring hexosyl groups	-1.82
AT3G52790	AT3G52790	peptidoglycan-binding LysM domain-containing protein	-1.82
TBL35	AT5G01620	similar to unknown protein [Arabidopsis thaliana] (TAIR:AT2G38320.1); similar to unnamed protein product [Vitis vinifera] (GB:CAO48780.1); contains InterPro domain Protein of unknown function DUF231, plant (InterPro:IPR004253)	-1.82
CYP712A1	AT2G42250	[AT2G42250, CYP712A1 (cytochrome P450, family 712, subfamily A, polypeptide 1); oxygen binding];[AT2G42247, other RNA]	-1.81
AT3G12390	AT3G12390	nascent polypeptide associated complex alpha chain protein, putative / alpha-NAC, putative	-1.81
AT5G08580	AT5G08580	calcium-binding EF hand family protein	-1.81
AT2G17280	AT2G17280	phosphoglycerate/bisphosphoglycerate mutase family protein	-1.81
AT3G29430	AT3G29430	geranylgeranyl pyrophosphate synthase, putative / GGPP synthetase, putative / farnesyltranstransferase, putative	-1.81
EXO70H1	AT3G55150	ATEXO70H1 (exocyst subunit EXO70 family protein H1); protein binding	-1.81
STS	AT4G01970	ATSTS (ARABIDOPSIS THALIANA STACHYOSE SYNTHASE); galactinol-raffinose galactosyltransferase/ hydrolase, hydrolyzing O-glycosyl compounds	-1.81
COX6B	AT1G22450	COX6B (CYTOCHROME C OXIDASE 6B); cytochrome-c oxidase	-1.81
AT2G45750	AT2G45750	dehydration-responsive family protein	-1.81
TIP2;3	AT5G47450	AtTIP2;3 (Arabidopsis thaliana tonoplast intrinsic protein 2;3); water channel	-1.81
ATCAD4	AT3G19450	CAD4 (CINNAMYL ALCOHOL DEHYDROGENASE 4); cinnamyl-alcohol dehydrogenase	-1.81
AT3G29280	AT3G29280	similar to unknown [Populus trichocarpa] (GB:ABK93016.1)	-1.81
KCS11	AT2G26640	beta-ketoacyl-CoA synthase, putative	-1.81
CYP51G1	AT1G11680	CYP51G1 (CYTOCHROME P450 51); oxygen binding	-1.81
AT3G08680	AT3G08680	leucine-rich repeat transmembrane protein kinase, putative	-1.81
AT4G13170	AT4G13170	60S ribosomal protein L13A (RPL13aC)	-1.81
AT1G52300	AT1G52300	zinc-binding ribosomal protein family protein	-1.80
HSFB4	AT1G46264	AT-HSFB4 (Arabidopsis thaliana heat shock transcription factor B4); DNA binding / transcription factor	-1.80
CARB	AT1G29900	CARB (CARBAMOYL PHOSPHATE SYNTHETASE B); ATP binding / carbamoyl-phosphate synthase	-1.80
AT5G41670	AT5G41670	6-phosphogluconate dehydrogenase family protein	-1.80
AT2G03505	AT2G03505	glycosyl hydrolase family protein 17	-1.80
AT5G44530	AT5G44530	subtilase family protein	-1.80
AT1G05700	AT1G05700	leucine-rich repeat protein kinase, putative	-1.80
AT1G31710	AT1G31710	copper amine oxidase, putative	-1.80
AT5G62550	AT5G62550	similar to unknown protein [Arabidopsis thaliana] (TAIR:AT3G28770.1); similar to unknown [Populus trichocarpa] (GB:ABK92769.1)	-1.80
AT1G30990	AT1G30990	major latex protein-related / MLP-related	-1.80
AUR1	AT4G32830	ATAUR1 (ATAURORA1); histone serine kinase(H3-S10 specific) / kinase/ protein serine/threonine kinase	-1.80
RPB5C	AT5G57980	eukaryotic rpb5 RNA polymerase subunit family protein	-1.80
MYB23	AT5G40330	MYB23 (myb domain protein 23); DNA binding / transcription factor	-1.80
AT3G06868	AT3G06868	similar to unknown protein [Arabidopsis thaliana] (TAIR:AT5G49100.1); similar to unnamed protein product [Vitis vinifera] (GB:CAO44794.1)	-1.79
AT4G23500	AT4G23500	glycoside hydrolase family 28 protein / polygalacturonase (pectinase) family protein	-1.79
PRXR1	AT4G21960	PRXR1 (peroxidase 42); peroxidase	-1.79
PFD1	AT2G07340	prefoldin-related KE2 family protein	-1.79
iqd8	AT1G72670	IQD8 (IQ-domain 8); calmodulin binding	-1.79
AT1G47480	AT1G47480	hydrolase	-1.79
GER2	AT1G17890	GER2; catalytic	-1.79
AT1G77640	AT1G77640	AP2 domain-containing transcription factor, putative	-1.79
BIO2	AT2G43360	BIO2 (BIOTIN AUXOTROPH 2); biotin synthase	-1.79
CDC20.2	AT4G33260	CDC20.2; signal transducer	-1.79
AT3G12970	AT3G12970	similar to unknown protein [Arabidopsis thaliana] (TAIR:AT1G56020.1); similar to hypothetical protein [Vitis vinifera] (GB:CAN69700.1)	-1.78
GASA1	AT1G75750	GAST1 PROTEIN HOMOLOG 1	-1.78
AT1G70780	AT1G70780	[AT1G70782, CPuORF28 (Conserved peptide upstream open reading frame 28)];[AT1G70780, similar to unknown protein [Arabidopsis thaliana] (TAIR:AT1G23150.1); similar to unnamed protein product [Vitis vinifera] (GB:CAO42314.1)]	-1.78
RAB7A	AT2G21880	AtRABG2/AtRab7A (Arabidopsis Rab GTPase homolog G2); GTP binding	-1.78
TPI	AT3G55440	CYTOSOLIC ISOFORM TRIOSE PHOSPHATE ISOMERASE	-1.78
RIP3	AT2G37080	myosin heavy chain-related	-1.78
cICDH	AT1G65930	isocitrate dehydrogenase, putative / NADP+ isocitrate dehydrogenase, putative	-1.78
AT2G46140	AT2G46140	late embryogenesis abundant protein, putative / LEA protein, putative	-1.78
ATK5	AT4G05190	ATK5 (Arabidopsis thaliana kinesin 5); microtubule motor	-1.78
AT5G08680	AT5G08680	ATP synthase beta chain, mitochondrial, putative	-1.78
AT1G70080	AT1G70080	terpene synthase/cyclase family protein	-1.78
AT1G71870	AT1G71870	MATE efflux family protein	-1.78
AT5G14030	AT5G14030	translocon-associated protein beta (TRAPB) family protein	-1.78
AT3G50300	AT3G50300	transferase family protein	-1.78
AT5G19740	AT5G19740	peptidase M28 family protein	-1.78
AT3G62870	AT3G62870	60S ribosomal protein L7A (RPL7aB)	-1.78
HSBP	AT4G15802	similar to unknown [Populus trichocarpa] (GB:ABK93842.1); contains InterPro domain Heat shock factor binding 1 (InterPro:IPR009643)	-1.78
BTF3	AT1G17880	nascent polypeptide-associated complex (NAC) domain-containing protein / BTF3b-like transcription factor, putative	-1.78
AT3G44050	AT3G44050	kinesin motor protein-related	-1.78
AT1G68810	AT1G68810	basic helix-loop-helix (bHLH) family protein	-1.78
AT4G22190	AT4G22190	similar to unknown [Populus trichocarpa] (GB:ABK94177.1)	-1.77
AT2G21100	AT2G21100	disease resistance-responsive protein-related / dirigent protein-related	-1.77
TIM8	AT5G50810	TIM8 (Arabidopsis thaliana translocase inner membrane subunit 8); P-P-bond-hydrolysis-driven protein transmembrane transporter	-1.77
AT2G22122	AT2G22122	unknown protein	-1.77
AT1G68650	AT1G68650	similar to unknown protein [Arabidopsis thaliana] (TAIR:AT1G25520.1); similar to unnamed protein product [Vitis vinifera] (GB:CAO42107.1); contains InterPro domain Protein of unknown function UPF0016; (InterPro:IPR001727)	-1.77
HTA13	AT3G20670	HTA13; DNA binding	-1.77
bZIP3	AT5G15830	ATBZIP3 (ARABIDOPSIS THALIANA BASIC LEUCINE-ZIPPER 3); DNA binding / transcription factor	-1.77
DECOY	AT1G14620	DECOY (endoxyloglucan transferase A2)	-1.77
AT2G20060	AT2G20060	ribosomal protein L4 family protein	-1.77
MGP	AT1G03840	MGP (MAGPIE); nucleic acid binding / protein binding / transcription factor/ zinc ion binding	-1.77
AT5G60390	AT5G60390	elongation factor 1-alpha / EF-1-alpha	-1.77
ARR4	AT1G10470	ARR4 (RESPONSE REGULATOR 4); transcription regulator/ two-component response regulator	-1.77
AT2G38380	AT2G38380	peroxidase 22 (PER22) (P22) (PRXEA) / basic peroxidase E	-1.76
ISPD	AT2G02500	ISPD (2-C-METHYL-D-ERYTHRITOL 4-PHOSPHATE CYTIDYLTRANSFERASE)	-1.76
AT1G10380	AT1G10380	similar to unknown protein [Arabidopsis thaliana] (TAIR:AT3G17350.1); similar to unnamed protein product [Vitis vinifera] (GB:CAO40998.1); contains domain PROKAR_LIPOPROTEIN (PS51257)	-1.76
TAA1	AT1G70560	alliinase C-terminal domain-containing protein	-1.76
AT5G01930	AT5G01930	[AT5G01930, (1-4)-beta-mannan endohydrolase, putative];[AT5G01920, STN8 (state transition 8); kinase]	-1.76
AT2G36170	AT2G36170	ubiquitin extension protein 2 (UBQ2) / 60S ribosomal protein L40 (RPL40A)	-1.76
AT4G31985	AT4G31985	60S ribosomal protein L39 (RPL39C)	-1.76
PDF1	AT2G42840	PDF1 (PROTODERMAL FACTOR 1)	-1.76
AT2G26900	AT2G26900	bile acid:sodium symporter family protein	-1.76
UXS6	AT2G28760	UXS6; catalytic	-1.76
AT3G44010	AT3G44010	40S ribosomal protein S29 (RPS29B)	-1.76
AT5G27400	AT5G27400	similar to unnamed protein product [Vitis vinifera] (GB:CAO17659.1); contains domain SSF53335 (SSF53335); contains domain PTHR23109 (PTHR23109)	-1.76
GAMMA CA2	AT1G47260	APFI; carbonate dehydratase	-1.76
AT1G65900	AT1G65900	similar to unnamed protein product [Vitis vinifera] (GB:CAO22185.1); contains domain "Helical backbone" metal receptor (SSF53807)	-1.76
RGP1	AT3G02230	RGP1 (REVERSIBLY GLYCOSYLATED POLYPEPTIDE 1)	-1.76
HB52	AT5G53980	ATHB52 (ARABIDOPSIS THALIANA HOMEOBOX PROTEIN 52); transcription factor	-1.76
ACO1	AT2G19590	ACO1 (ACC OXIDASE 1); 1-aminocyclopropane-1-carboxylate oxidase	-1.76
AT5G20500	AT5G20500	glutaredoxin, putative	-1.76
OFP13	AT5G04820	ATOFP13/OFP13 (Arabidopsis thaliana ovate family protein 13)	-1.76
MAP65-4	AT3G60840	microtubule associated protein (MAP65/ASE1) family protein	-1.76
AT1G04480	AT1G04480	60S ribosomal protein L23 (RPL23A)	-1.76
AT5G49100	AT5G49100	similar to unknown protein [Arabidopsis thaliana] (TAIR:AT3G06868.1); similar to unnamed protein product [Vitis vinifera] (GB:CAO44794.1)	-1.76
AT3G05900	AT3G05900	[AT3G05900, neurofilament protein-related];[AT3G05905, other RNA]	-1.76
BRS1	AT4G30610	BRS1 (BRI1 SUPPRESSOR 1)	-1.75
GSTF14	AT1G49860	ATGSTF14 (Arabidopsis thaliana Glutathione S-transferase (class phi) 14); glutathione transferase	-1.75
AT4G31250	AT4G31250	[AT4G31250, leucine-rich repeat transmembrane protein kinase, putative];[AT4G31248, other RNA]	-1.75
AT5G40610	AT5G40610	glycerol-3-phosphate dehydrogenase (NAD+) / GPDH	-1.75
AT3G49630	AT3G49630	2-oxoacid-dependent oxidase, putative	-1.75
CBL	AT3G57050	CBL (CYSTATHIONINE BETA-LYASE)	-1.75
AT5G60800	AT5G60800	heavy-metal-associated domain-containing protein	-1.75
AT1G24360	AT1G24360	3-oxoacyl-(acyl-carrier protein) reductase, chloroplast / 3-ketoacyl-acyl carrier protein reductase	-1.75
AT3G03130	AT3G03130	similar to unknown protein [Arabidopsis thaliana] (TAIR:AT5G17160.1); similar to unnamed protein product [Vitis vinifera] (GB:CAO62214.1)	-1.75
AT3G19030	AT3G19030	similar to unknown protein [Arabidopsis thaliana] (TAIR:AT1G49500.1)	-1.75
AT2G28315	AT2G28315	transporter-related	-1.75
AT1G73230	AT1G73230	nascent polypeptide-associated complex (NAC) domain-containing protein	-1.75
SYP123	AT4G03330	SYP123 (syntaxin 123); SNAP receptor	-1.75
AT2G43610	AT2G43610	glycoside hydrolase family 19 protein	-1.75
AT5G49560	AT5G49560	similar to unknown protein [Arabidopsis thaliana] (TAIR:AT3G50850.1); similar to unknown [Picea sitchensis] (GB:ABK22976.1); contains domain SSF53335 (SSF53335); contains domain PTHR14614 (PTHR14614)	-1.75
CSLA03	AT1G23480	ATCSLA03 (Cellulose synthase-like A3); transferase, transferring glycosyl groups	-1.75
AT5G51890	AT5G51890	peroxidase	-1.75
AT5G57070	AT5G57070	hydroxyproline-rich glycoprotein family protein	-1.75
CAM7	AT3G43810	CAM7 (CALMODULIN 7); calcium ion binding	-1.74
AT2G37820	AT2G37820	DC1 domain-containing protein	-1.74
AT3G05150	AT3G05150	sugar transporter family protein	-1.74
AT5G58420	AT5G58420	40S ribosomal protein S4 (RPS4D)	-1.74
AT5G51520	AT5G51520	invertase/pectin methylesterase inhibitor family protein	-1.74
AT1G60770	AT1G60770	pentatricopeptide (PPR) repeat-containing protein	-1.74
bZIP44	AT1G75390	[AT1G75388, CPuORF5 (Conserved peptide upstream open reading frame 5)];[AT1G75390, ATBZIP44 (ARABIDOPSIS THALIANA BASIC LEUCINE-ZIPPER 44); DNA binding / protein heterodimerization/ transcription factor]	-1.74
PDR7	AT1G15210	ATPDR7/PDR7 (PLEIOTROPIC DRUG RESISTANCE 7); ATPase, coupled to transmembrane movement of substances	-1.74
AT1G72810	AT1G72810	threonine synthase, putative	-1.74
ARFA1F	AT1G10630	ATARFA1F; GTP binding / phospholipase activator/ protein binding	-1.74
AT3G27240	AT3G27240	cytochrome c1, putative	-1.74
ETG1	AT2G40550	similar to unnamed protein product [Vitis vinifera] (GB:CAO41481.1); contains domain PTHR13489 (PTHR13489)	-1.74
LysoPL2	AT1G52760	esterase/lipase/thioesterase family protein	-1.74
AT4G39860	AT4G39860	similar to unknown protein [Arabidopsis thaliana] (TAIR:AT2G22270.1); similar to unnamed protein product [Vitis vinifera] (GB:CAO39818.1)	-1.74
ATARCA	AT1G18080	ATARCA (Arabidopsis thaliana Homolog of the Tobacco ArcA); nucleotide binding	-1.74
AT3G18940	AT3G18940	clast3-related	-1.74
AT5G35530	AT5G35530	40S ribosomal protein S3 (RPS3C)	-1.73
AT3G63170	AT3G63170	similar to unknown protein [Arabidopsis thaliana] (TAIR:AT2G26310.1); similar to unnamed protein product [Vitis vinifera] (GB:CAO22529.1); contains InterPro domain Chalcone isomerase-like (InterPro:IPR016087)	-1.73
AT5G64670	AT5G64670	ribosomal protein L15 family protein	-1.73
AT5G59613	AT5G59613	similar to unknown protein [Arabidopsis thaliana] (TAIR:AT3G46430.1); similar to mitochondrial ATP synthase 6 KD subunit [Oryza sativa (japonica cultivar-group)] (GB:BAB21526.1)	-1.73
AT1G43800	AT1G43800	acyl-(acyl-carrier-protein) desaturase, putative / stearoyl-ACP desaturase, putative	-1.73
NDPK3	AT4G11010	nucleoside diphosphate kinase 3	-1.73
AT5G42110	AT5G42110	unknown protein	-1.73
SAL1	AT5G63980	SAL1 (FIERY1); 3'(2'),5'-bisphosphate nucleotidase/ inositol or phosphatidylinositol phosphatase	-1.73
AT4G27270	AT4G27270	quinone reductase family protein	-1.73
AT5G65360	AT5G65360	histone H3	-1.73
PPa6	AT5G09650	ATPPA6 (ARABIDOPSIS THALIANA PYROPHOSPHORYLASE 6); inorganic diphosphatase/ pyrophosphatase	-1.73
AT5G65880	AT5G65880	unknown protein	-1.73
AT3G21190	AT3G21190	similar to unknown protein [Arabidopsis thaliana] (TAIR:AT1G51630.1); similar to unknown [Populus trichocarpa] (GB:ABK93128.1); contains InterPro domain Protein of unknown function DUF246, plant (InterPro:IPR004348)	-1.73
STV1	AT3G53020	STV1 (SHORT VALVE1); structural constituent of ribosome	-1.73
bHLH093	AT5G65640	BHLH093 (BETA HLH PROTEIN 93); DNA binding / transcription factor	-1.72
GSR2	AT1G66200	ATGSR2 (Arabidopsis thaliana glutamine synthase clone R2); glutamate-ammonia ligase	-1.72
AT5G45490	AT5G45490	disease resistance protein-related	-1.72
SHM2	AT5G26780	SHM2 (SERINE HYDROXYMETHYLTRANSFERASE 2); glycine hydroxymethyltransferase	-1.72
AT3G62120	AT3G62120	tRNA synthetase class II (G, H, P and S) family protein	-1.72
AT5G54200	AT5G54200	WD-40 repeat family protein	-1.72
EXPA17	AT4G01630	ATEXPA17 (ARABIDOPSIS THALIANA EXPANSIN A17)	-1.72
AT1G53645	AT1G53645	hydroxyproline-rich glycoprotein family protein	-1.72
MKK6	AT5G56580	ATMKK6 (ARABIDOPSIS NQK1); kinase	-1.72
AT4G22160	AT4G22160	unknown protein	-1.72
WAKL5	AT1G16160	WAKL5 (WALL ASSOCIATED KINASE-LIKE 5); kinase	-1.72
AT4G31310	AT4G31310	avirulence-responsive protein-related / avirulence induced gene (AIG) protein-related	-1.72
AT2G25240	AT2G25240	serine-type endopeptidase inhibitor	-1.72
AT2G26440	AT2G26440	pectinesterase family protein	-1.72
3-Oct	AT1G16390	ATOCT3 (ARABIDOPSIS THALIANA ORGANIC CATION/CARNITINE TRANSPORTER2); carbohydrate transmembrane transporter/ sugar:hydrogen ion symporter	-1.72
NEK3	AT5G28290	ATNEK3; kinase	-1.72
CYP735A2	AT1G67110	CYP735A2 (cytochrome P450, family 735, subfamily A, polypeptide 2); oxygen binding	-1.72
AT1G05870	AT1G05870	similar to unknown protein [Arabidopsis thaliana] (TAIR:AT2G31560.1); similar to unknown protein [Arabidopsis thaliana] (TAIR:AT2G31560.2); similar to hypothetical protein [Vitis vinifera] (GB:CAN60580.1); contains InterPro domain Protein of unknown function DUF1685 (InterPro:IPR012881)	-1.71
AT1G51650	AT1G51650	ATP synthase epsilon chain, mitochondrial	-1.71
AT5G39600	AT5G39600	[AT5G39590, similar to unnamed protein product [Vitis vinifera] (GB:CAO61019.1); contains InterPro domain TLDc (InterPro:IPR006571)];[AT5G39600, similar to unknown [Populus trichocarpa] (GB:ABK93996.1); similar to unnamed protein product [Vitis vinifera] (GB:CAO61020.1)]	-1.71
NCRK	AT2G28250	protein kinase family protein. Binds AtRop4.	-1.71
CYP78A5	AT1G13710	CYP78A5 (cytochrome P450, family 78, subfamily A, polypeptide 5); oxygen binding	-1.71
AT4G34700	AT4G34700	complex 1 family protein / LVR family protein	-1.71
AUR3	AT2G45490	ATAUR3 (ATAURORA3); ATP binding / histone serine kinase(H3-S10 specific) / protein kinase	-1.71
AT2G45220	AT2G45220	pectinesterase family protein	-1.71
DWF5	AT1G50430	DWF5 (DWARF 5); sterol delta7 reductase	-1.71
AT2G41610	AT2G41610	[AT2G41610, similar to unnamed protein product [Vitis vinifera] (GB:CAO24352.1)];[AT2G41620, nucleoporin interacting component family protein]	-1.71
AT1G29980	AT1G29980	similar to unknown protein [Arabidopsis thaliana] (TAIR:AT2G34510.1); similar to unknown [Populus trichocarpa] (GB:ABK95079.1); contains InterPro domain Protein of unknown function DUF642 (InterPro:IPR006946); contains InterPro domain Galactose-binding like (InterPro:IPR008979)	-1.71
AT4G11310	AT4G11310	cysteine proteinase, putative	-1.71
AT1G29890	AT1G29890	acetyltransferase-related	-1.71
HD2B	AT5G22650	HD2B (HISTONE DEACETYLASE 2B)	-1.71
GATL5	AT1G02720	GATL5; polygalacturonate 4-alpha-galacturonosyltransferase/ transferase, transferring glycosyl groups / transferase, transferring hexosyl groups	-1.70
AT3G32030	AT3G31415	terpene synthase/cyclase family protein	-1.70
AT2G47320	AT2G47320	peptidyl-prolyl cis-trans isomerase cyclophilin-type family protein	-1.70
AT2G36885	AT2G36885	similar to unnamed protein product [Vitis vinifera] (GB:CAO63025.1)	-1.70
AT4G18030	AT4G18030	dehydration-responsive family protein	-1.70
TIM17-3	AT5G11690	ATTIM17-3 (Arabidopsis thaliana translocase inner membrane subunit 17-3); P-P-bond-hydrolysis-driven protein transmembrane transporter	-1.70
MEE15	AT2G16970	MEE15 (maternal effect embryo arrest 15); tetracycline transporter	-1.70
AT4G15640	AT4G15640	similar to unknown protein [Arabidopsis thaliana] (TAIR:AT3G21465.1); similar to unnamed protein product [Vitis vinifera] (GB:CAO71016.1)	-1.70
LBD39	AT4G37540	LBD39 (LOB DOMAIN-CONTAINING PROTEIN 39)	-1.70
SERK1	AT1G71830	SERK1 (SOMATIC EMBRYOGENESIS RECEPTOR-LIKE KINASE 1); kinase	-1.70
NDL3	AT2G19620	Ndr family protein	-1.69
BARD1	AT1G04020	ATBARD1/BARD1 (BREAST CANCER ASSOCIATED RING 1); transcription coactivator	-1.69
AT3G56570	AT3G56570	SET domain-containing protein	-1.69
AT1G15470	AT1G15470	transducin family protein / WD-40 repeat family protein	-1.69
ATPQ	AT3G52300	ATPQ (ATP SYNTHASE D CHAIN, MITOCHONDRIAL); hydrogen ion transporting ATP synthase, rotational mechanism / hydrogen ion transporting ATPase, rotational mechanism	-1.69
RHS10	AT1G70460	protein kinase, putative	-1.69
CYCP3;2	AT3G60550	CYCP3;2 (cyclin p3;2); cyclin-dependent protein kinase	-1.69
AT2G15280	AT2G15280	reticulon family protein (RTNLB10)	-1.69
AT5G58900	AT5G58900	myb family transcription factor	-1.69
BRL2	AT2G01950	BRL2 (BRI1-LIKE 2); ATP binding / protein serine/threonine kinase	-1.69
SKB1	AT4G31120	ATPRMT5/PRMT5/SKB1 (SHK1 BINDING PROTEIN 1); protein methyltransferase	-1.69
AT2G39110	AT2G39110	protein kinase, putative	-1.69
AT5G47500	AT5G47500	pectinesterase family protein	-1.69
GAPC2	AT1G13440	GAPC-2; glyceraldehyde-3-phosphate dehydrogenase	-1.69
LTPG1	AT1G27950	lipid transfer protein-related	-1.69
AT4G25835	AT4G25835	AAA-type ATPase family protein	-1.69
AT3G51450	AT3G51450	strictosidine synthase family protein	-1.69
PDIL1-3	AT3G54960	ATPDIL1-3 (PDI-LIKE 1-3); thiol-disulfide exchange intermediate	-1.68
HAT1	AT4G17460	HAT1 (homeobox-leucine zipper protein 1); DNA binding / transcription factor	-1.68
sks17	AT5G66920	SKS17 (SKU5 Similar 17); copper ion binding / oxidoreductase	-1.68
AT5G14520	AT5G14520	pescadillo-related	-1.68
XTH20	AT5G48070	ATXTH20 (XYLOGLUCAN ENDOTRANSGLUCOSYLASE/HYDROLASE 20); hydrolase, acting on glycosyl bonds	-1.68
AT1G54790	AT1G54790	GDSL-motif lipase/hydrolase family protein	-1.68
TBL2	AT1G60790	similar to unknown protein [Arabidopsis thaliana] (TAIR:AT5G06700.1); similar to unnamed protein product [Vitis vinifera] (GB:CAO66110.1); contains InterPro domain Protein of unknown function DUF231, plant (InterPro:IPR004253)	-1.68
AT4G02850	AT4G02850	phenazine biosynthesis PhzC/PhzF family protein	-1.68
AT1G44760	AT1G44760	universal stress protein (USP) family protein	-1.68
TIM13	AT1G61570	TIM13; P-P-bond-hydrolysis-driven protein transmembrane transporter	-1.68
AT4G33810	AT4G33810	glycosyl hydrolase family 10 protein	-1.68
RGXT1	AT4G01770	RGXT1 (RHAMNOGALACTURONAN XYLOSYLTRANSFERASE 1); UDP-xylosyltransferase	-1.68
AT5G23900	AT5G23900	60S ribosomal protein L13 (RPL13D)	-1.68
AT5G56530	AT5G56530	similar to unknown protein [Arabidopsis thaliana] (TAIR:AT1G55360.1); similar to unknown protein [Arabidopsis thaliana] (TAIR:AT3G13510.1); similar to unnamed protein product [Vitis vinifera] (GB:CAO22094.1); similar to Os07g0573400 [Oryza sativa (japonica cultivar-group)] (GB:NP_001060067.1); similar to hypothetical protein [Vitis vinifera] (GB:CAN72570.1); contains InterPro domain Protein of un…	-1.68
AT3G53870	AT3G53870	40S ribosomal protein S3 (RPS3B)	-1.68
AT1G07940	AT1G07940	elongation factor 1-alpha / EF-1-alpha	-1.68
TIP2;2	AT4G17340	DELTA-TIP2/TIP2;2 (tonoplast intrinsic protein 2;2); water channel	-1.68
CER4	AT4G33790	acyl CoA reductase, putative	-1.67
ARR6	AT5G62920	ARR6 (RESPONSE REGULATOR 6); transcription regulator/ two-component response regulator	-1.67
GLYR1	AT3G25530	ATGHBDH/GHBDH; 3-hydroxybutyrate dehydrogenase/ phosphogluconate dehydrogenase (decarboxylating)	-1.67
AT2G23400	AT2G23400	dehydrodolichyl diphosphate synthase, putative / DEDOL-PP synthase, putative	-1.67
RPL10B	AT1G26910	60S ribosomal protein L10 (RPL10B)	-1.67
AT2G33847	AT2G33847	[AT2G33847, similar to unknown protein [Arabidopsis thaliana] (TAIR:AT1G28395.4); similar to unnamed protein product [Vitis vinifera] (GB:CAO39903.1)];[AT2G33845, DNA-binding protein-related]	-1.67
IPT5	AT5G19040	ATIPT5 (Arabidopsis thaliana isopentenyltransferase 5); transferase, transferring alkyl or aryl (other than methyl) groups	-1.67
AT4G20450	AT4G20450	leucine-rich repeat protein kinase, putative	-1.67
AT3G27330	AT3G27330	zinc finger (C3HC4-type RING finger) family protein	-1.67
AT1G11670	AT1G11670	MATE efflux family protein	-1.67
AT5G45590	AT5G45590	structural constituent of ribosome	-1.67
RRTF1	AT4G34410	AP2 domain-containing transcription factor, putative	-1.67
AT2G36420	AT2G36420	similar to unknown protein [Arabidopsis thaliana] (TAIR:AT5G03670.1); similar to unnamed protein product [Vitis vinifera] (GB:CAO15955.1)	-1.67
RRP4	AT1G03360	ATRRP4; exonuclease	-1.67
AT3G06770	AT3G06770	glycoside hydrolase family 28 protein / polygalacturonase (pectinase) family protein	-1.67
AT1G28350	AT1G28350	ATP binding / aminoacyl-tRNA ligase	-1.67
TUA3	AT5G19770	TUA3 (tubulin alpha-3)	-1.67
AT4G20150	AT4G20150	similar to Os07g0498300 [Oryza sativa (japonica cultivar-group)] (GB:NP_001059709.1); similar to unknown [Populus trichocarpa] (GB:ABK94837.1)	-1.66
AT3G07070	AT3G07070	protein kinase family protein	-1.66
AT4G29680	AT4G29680	type I phosphodiesterase/nucleotide pyrophosphatase family protein	-1.66
PGI1	AT4G24620	PGI1 (CHLOROPLASTIC PHOSPHOGLUCOSE ISOMERASE)	-1.66
AT5G19750	AT5G19750	peroxisomal membrane 22 kDa family protein	-1.66
AT4G34810	AT4G34810	auxin-responsive family protein	-1.66
WRKY54	AT2G40750	WRKY54 (WRKY DNA-binding protein 54); transcription factor	-1.66
AT3G20460	AT3G20460	sugar transporter, putative	-1.66
MYR1	AT5G18240	MYR1 (MYB-RELATED PROTEIN 1); transcription factor	-1.66
AT5G44710	AT5G44710	similar to unnamed protein product [Vitis vinifera] (GB:CAO41922.1); contains InterPro domain Ribosomal protein S27, mitochondrial (InterPro:IPR013219)	-1.66
AT2G40960	AT2G40960	nucleic acid binding	-1.66
IQD30	AT1G18840	IQD30; calmodulin binding	-1.66
AT2G20240	AT2G20240	similar to unknown protein [Arabidopsis thaliana] (TAIR:AT4G28760.2); similar to unknown protein [Arabidopsis thaliana] (TAIR:AT4G28760.1); similar to unnamed protein product [Vitis vinifera] (GB:CAO40507.1); contains domain PTHR21726:SF7 (PTHR21726:SF7); contains domain PTHR21726 (PTHR21726)	-1.66
CER10	AT3G55360	ATTSC13/CER10/ECR/TSC13 (ENOYL-COA REDUCTASE); 3-oxo-5-alpha-steroid 4-dehydrogenase/ fatty acid elongase/ trans-2-enoyl-CoA reductase (NADPH)	-1.66
AT1G77550	AT1G77550	protein binding / tubulin-tyrosine ligase	-1.66
AT5G43030	AT5G43030	DC1 domain-containing protein	-1.65
AT4G01730	AT4G01730	zinc finger (DHHC type) family protein	-1.65
AT2G27775	AT2G27775	similar to unknown protein [Arabidopsis thaliana] (TAIR:AT2G27800.1); similar to unknown [Populus trichocarpa] (GB:ABK95440.1)	-1.65
AT5G26800	AT5G26800	unknown protein	-1.65
AT1G48610	AT1G48610	AT hook motif-containing protein	-1.65
TUA4	AT1G04820	TUBULIN ALPHA-4 CHAIN	-1.65
AT3G55310	AT3G55310	oxidoreductase	-1.65
XTR8	AT3G44990	XTR8 (xyloglucan:xyloglucosyl transferase 8); hydrolase, acting on glycosyl bonds	-1.65
AT1G12000	AT1G12000	phosphofructokinase family protein	-1.65
AT4G16155	AT4G16155	dihydrolipoamide dehydrogenase 2, plastidic / lipoamide dehydrogenase 2 (PTLPD2)	-1.65
RPA70B	AT5G08020	replication protein, putative	-1.65
KDSB	AT1G53000	cytidylyltransferase family	-1.65
AT1G12160	AT1G12160	flavin-containing monooxygenase family protein / FMO family protein	-1.65
AT1G56045	AT1G56045	ribosomal protein L41 family protein	-1.65
AT5G12970	AT5G12970	C2 domain-containing protein	-1.65
BGAL12	AT4G26140	BGAL12 (beta-galactosidase 12); beta-galactosidase	-1.65
AT3G46430	AT3G46430	similar to unknown protein [Arabidopsis thaliana] (TAIR:AT5G59613.1); similar to mitochondrial ATP synthase 6 KD subunit [Oryza sativa (japonica cultivar-group)] (GB:BAB21526.1)	-1.65
AT3G22600	AT3G22600	protease inhibitor/seed storage/lipid transfer protein (LTP) family protein	-1.65
ULT1	AT4G28190	ULT1 (ULTRAPETALA1); DNA binding / binding	-1.65
FLA7	AT2G04780	FLA7	-1.65
SSL3	AT1G08470	strictosidine synthase family protein	-1.65
RLK902	AT3G17840	RLK902 (receptor-like kinase 902); ATP binding / kinase/ protein serine/threonine kinase	-1.65
AT3G49320	AT3G49320	similar to unknown protein [Arabidopsis thaliana] (TAIR:AT5G41970.1); similar to unnamed protein product [Vitis vinifera] (GB:CAO62930.1); contains InterPro domain Metal-dependent protein hydrolase (InterPro:IPR003226)	-1.65
SYP111	AT1G08560	SYP111 (syntaxin 111); SNAP receptor	-1.64
AT3G07210	AT3G07210	catalytic	-1.64
GH9B8	AT2G32990	ATGH9B8 (ARABIDOPSIS THALIANA GLYCOSYL HYDROLASE 9B8); hydrolase, hydrolyzing O-glycosyl compounds	-1.64
AT5G45920	AT5G45920	carboxylesterase	-1.64
BNQ3	AT3G47710	bHLH family protein	-1.64
AT3G07568	AT3G07568	similar to unknown [Picea sitchensis] (GB:ABK20920.1)	-1.64
KIS	AT2G30410	KIS (KIESEL); unfolded protein binding	-1.64
AT5G55125	AT5G55125	similar to hypothetical protein OsI_035046 [Oryza sativa (indica cultivar-group)] (GB:EAY81087.1); similar to hypothetical protein LOC_Os11g31650 [Oryza sativa (japonica cultivar-group)] (GB:ABA93933.1)	-1.64
AT5G60730	AT5G60730	anion-transporting ATPase family protein	-1.64
NPC3	AT3G03520	phosphoesterase family protein	-1.64
AT3G18410	AT3G18410	NADH-ubiquinone oxidoreductase-related	-1.64
AT5G12150	AT5G12150	pleckstrin homology (PH) domain-containing protein / RhoGAP domain-containing protein	-1.64
BCA4	AT1G70410	carbonic anhydrase, putative / carbonate dehydratase, putative	-1.64
AT1G29730	AT1G29730	kinase/ protein serine/threonine kinase	-1.64
AT2G21160	AT2G21160	translocon-associated protein alpha (TRAP alpha) family protein	-1.64
AT1G78860	AT1G78860	curculin-like (mannose-binding) lectin family protein	-1.64
AT4G31910	AT4G31910	transferase family protein	-1.63
AT5G44720	AT5G44720	molybdenum cofactor sulfurase family protein	-1.63
AT1G23190	AT1G23190	phosphoglucomutase, cytoplasmic, putative / glucose phosphomutase, putative	-1.63
AT2G03350	AT2G03350	similar to unknown protein [Arabidopsis thaliana] (TAIR:AT3G08890.1); similar to unknown protein [Arabidopsis thaliana] (TAIR:AT3G08890.2); similar to unnamed protein product [Vitis vinifera] (GB:CAO15324.1); contains InterPro domain Protein of unknown function DUF538 (InterPro:IPR007493)	-1.63
AT1G53542	AT1G53542	unknown protein	-1.63
AAC1	AT3G08580	AAC1 (ADP/ATP CARRIER 1); ATP:ADP antiporter/ binding	-1.63
AT5G66390	AT5G66390	peroxidase 72 (PER72) (P72) (PRXR8)	-1.63
AT3G05060	AT3G05060	SAR DNA-binding protein, putative	-1.63
PLP3b	AT5G66410	PLP3B (PHOSDUCIN-LIKE PROTEIN 3 HOMOLOG)	-1.63
DHAR1	AT1G19570	DHAR1 (DEHYDROASCORBATE REDUCTASE); glutathione dehydrogenase (ascorbate)	-1.63
AT1G16560	AT1G16560	Per1-like family protein	-1.63
AT3G43980	AT3G43980	40S ribosomal protein S29 (RPS29A)	-1.63
GRF4	AT3G52910	AtGRF4 (GROWTH-REGULATING FACTOR 4)	-1.63
AT1G10400	AT1G10400	UDP-glycosyltransferase/ transferase, transferring glycosyl groups	-1.63
PDH-E1 BETA	AT1G30120	PDH-E1 BETA (PYRUVATE DEHYDROGENASE E1 BETA); pyruvate dehydrogenase (acetyl-transferring)	-1.63
CYCP4;1	AT2G44740	CYCP4;1 (cyclin p4;1); cyclin-dependent protein kinase	-1.63
TOP3A	AT5G63920	DNA topoisomerase III alpha, putative	-1.63
MMT	AT5G49810	MMT (methionine S-methyltransferase); S-adenosylmethionine-dependent methyltransferase	-1.63
WNK1	AT3G04910	WNK1 (WITH NO LYSINE (K) 1); kinase	-1.63
AT5G63410	AT5G63410	leucine-rich repeat transmembrane protein kinase, putative	-1.63
AT5G67150	AT5G67150	transferase family protein	-1.63
AT2G34910	AT2G34910	similar to unknown protein [Arabidopsis thaliana] (TAIR:AT1G30850.1); similar to unnamed protein product [Vitis vinifera] (GB:CAO15288.1)	-1.62
GAPC1	AT3G04120	GAPC (GLYCERALDEHYDE-3-PHOSPHATE DEHYDROGENASE C SUBUNIT); glyceraldehyde-3-phosphate dehydrogenase	-1.62
PAI3	AT1G29410	PAI3 (PHOSPHORIBOSYLANTHRANILATE ISOMERASE 3); phosphoribosylanthranilate isomerase	-1.62
XYL4	AT5G64570	XYL4 (beta-xylosidase 4); hydrolase, hydrolyzing O-glycosyl compounds	-1.62
XSP1	AT4G00230	XSP1 (XYLEM SERINE PEPTIDASE 1); subtilase	-1.62
AT2G15300	AT2G15300	leucine-rich repeat transmembrane protein kinase, putative	-1.62
LHCB6	AT1G15820	LHCB6 (LIGHT HARVESTING COMPLEX PSII); chlorophyll binding	-1.62
AT5G60960	AT5G60960	pentatricopeptide (PPR) repeat-containing protein	-1.62
AT1G49500	AT1G49500	similar to unknown protein [Arabidopsis thaliana] (TAIR:AT3G19030.1)	-1.62
AT1G51810	AT1G51810	kinase	-1.62
AT1G20590	AT1G20590	cyclin, putative	-1.62
AT5G58480	AT5G58480	glycosyl hydrolase family 17 protein	-1.62
TOM6	AT1G49410	TOM6 (TRANSLOCASE OF THE OUTER MITOCHONDRIAL MEMBRANE 6)	-1.62
AT4G02580	AT4G02580	NADH-ubiquinone oxidoreductase 24 kDa subunit, putative	-1.62
EXPA6	AT2G28950	ATEXPA6 (ARABIDOPSIS THALIANA EXPANSIN A6)	-1.62
AT5G14050	AT5G14050	transducin family protein / WD-40 repeat family protein	-1.61
AT4G30680	AT4G30680	MA3 domain-containing protein	-1.61
AT5G41060	AT5G41060	zinc finger (DHHC type) family protein	-1.61
AT1G50580	AT1G50580	glycosyltransferase family protein	-1.61
AT2G04170	AT2G04170	meprin and TRAF homology domain-containing protein / MATH domain-containing protein	-1.61
MGP2	AT1G08660	glycosyl transferase family 29 protein / sialyltransferase family protein	-1.61
AT1G25320	AT1G25320	leucine-rich repeat transmembrane protein kinase, putative	-1.61
AT3G06040	AT3G06040	ribosomal protein L12 family protein	-1.61
MYB19	AT5G52260	AtMYB19 (myb domain protein 19); DNA binding / transcription factor	-1.61
AT3G26450	AT3G26450	[AT3G26450, major latex protein-related / MLP-related];[AT3G26460, major latex protein-related / MLP-related]	-1.61
AT5G18460	AT5G18460	similar to unknown protein [Arabidopsis thaliana] (TAIR:AT1G23340.1); similar to unknown protein [Arabidopsis thaliana] (TAIR:AT1G23340.2); similar to unnamed protein product [Vitis vinifera] (GB:CAO38766.1); contains InterPro domain Protein of unknown function DUF239, plant (InterPro:IPR004314)	-1.61
AT5G26850	AT5G26850	binding	-1.60
AT1G74460	AT1G74460	GDSL-motif lipase/hydrolase family protein	-1.60
AT3G12710	AT3G12710	methyladenine glycosylase family protein	-1.60
ATCSLA09	AT5G03760	ATCSLA09 (RESISTANT TO AGROBACTERIUM TRANSFORMATION 4); transferase, transferring glycosyl groups	-1.60
ATTPPA	AT5G51460	ATTPPA (Arabidopsis thaliana trehalose-6-phosphate phosphatase); trehalose-phosphatase	-1.60
AT3G21400	AT3G21400	similar to unknown [Populus trichocarpa] (GB:ABK93428.1)	-1.60
AT5G02370	AT5G02370	kinesin motor protein-related	-1.60
AT4G28360	AT4G28360	ribosomal protein L22 family protein	-1.60
AT2G39020	AT2G39020	GCN5-related N-acetyltransferase (GNAT) family protein	-1.60
AT4G34360	AT4G34360	protease-related	-1.60
AT5G45700	AT5G45700	NLI interacting factor (NIF) family protein	-1.60
AT1G08390	AT1G08390	nucleic acid binding	-1.60
TXND9	AT2G18990	TXND9 (THIOREDOXIN DOMAIN-CONTAINING PROTEIN 9 HOMOLOG)	-1.60
AT3G07050	AT3G07050	GTP-binding family protein	-1.60
AT5G15320	AT5G15320	similar to unknown protein [Arabidopsis thaliana] (TAIR:AT3G01130.1); similar to unknown [Populus trichocarpa] (GB:ABK94588.1)	-1.60
AT2G40765	AT2G40765	unknown protein	-1.60
TPS1	AT1G78580	ATTPS1 (TREHALOSE-6-PHOSPHATE SYNTHASE); transferase, transferring glycosyl groups	-1.60
BT1	AT5G63160	BT1 (BTB and TAZ domain protein 1); protein binding / transcription regulator	-1.60
TOM40	AT3G20000	TOM40 (translocase of the outer mitochondrial membrane 40); voltage-gated anion channel	-1.60
sks15	AT4G37160	SKS15 (SKU5 Similar 15); copper ion binding	-1.60
AT3G11630	AT3G11630	2-cys peroxiredoxin, chloroplast (BAS1)	-1.60
TUB4	AT5G44340	TUB4 (tubulin beta-4 chain)	-1.60
FLA6	AT2G20520	FLA6	-1.60
SAM-2	AT4G01850	MAT2/SAM-2 (S-adenosylmethionine synthetase 2); methionine adenosyltransferase	-1.60
AT1G08590	AT1G08590	CLAVATA1 receptor kinase (CLV1)	-1.60
AT3G55170	AT3G55170	60S ribosomal protein L35 (RPL35C)	-1.59
CLE7	AT2G31082	CLE7 (CLAVATA3/ESR-RELATED 7); receptor binding	-1.59
AT4G32470	AT4G32470	ubiquinol-cytochrome C reductase complex 14 kDa protein, putative	-1.59
AT3G25660	AT3G25660	glutamyl-tRNA(Gln) amidotransferase, putative	-1.59
TBL36	AT3G54260	similar to unknown protein [Arabidopsis thaliana] (TAIR:AT2G42570.1); similar to unnamed protein product [Vitis vinifera] (GB:CAO70127.1); contains InterPro domain Protein of unknown function DUF231, plant (InterPro:IPR004253)	-1.59
PDCB5	AT3G58100	glycosyl hydrolase family protein 17	-1.59
SLP3	AT2G19170	SLP3 (Subtilisin-like serine protease 3); subtilase	-1.59
CYC1BAT	AT5G06150	CYC1BAT (CYCLIN B 1;2); cyclin-dependent protein kinase regulator	-1.59
AT2G41475	AT2G41475	similar to embryo-specific protein-related [Arabidopsis thaliana] (TAIR:AT5G62200.1); similar to Embryo-specific 3 [Medicago truncatula] (GB:ABD28725.1); contains InterPro domain Embryo-specific 3 (InterPro:IPR010417); contains InterPro domain Lipase/lipooxygenase, PLAT/LH2 (InterPro:IPR008976)	-1.59
CPN60B	AT1G55490	CPN60B (CHAPERONIN 60 BETA); ATP binding / protein binding / unfolded protein binding	-1.59
AT2G04390	AT2G04390	Ribosomal S17 family protein	-1.59
SMO2-2	AT2G29390	SMO2-1 (sterol 4-alpha-methyl-oxidase 1); C-4 methylsterol oxidase	-1.59
AT3G44190	AT3G44190	pyridine nucleotide-disulphide oxidoreductase family protein	-1.59
PEN3	AT3G50110	phosphatase-related	-1.59
AT4G02930	AT4G02930	elongation factor Tu, putative / EF-Tu, putative	-1.59
AT4G22214	AT4G22214	Encodes a defensin-like (DEFL) family protein.	-1.59
AT1G09780	AT1G09780	2,3-biphosphoglycerate-independent phosphoglycerate mutase, putative / phosphoglyceromutase, putative	-1.59
FRO4	AT5G23980	ATFRO4/FRO4 (FERRIC REDUCTION OXIDASE 4); ferric-chelate reductase	-1.59
AT5G41520	AT5G41520	40S ribosomal protein S10 (RPS10B)	-1.59
AT4G17520	AT4G17520	nuclear RNA-binding protein, putative	-1.59
AT2G31390	AT2G31390	pfkB-type carbohydrate kinase family protein	-1.59
LTP3	AT5G59320	LTP3 (LIPID TRANSFER PROTEIN 3); lipid binding	-1.59
AT3G61100	AT3G61100	similar to unknown protein [Arabidopsis thaliana] (TAIR:AT3G61090.1); similar to unnamed protein product [Vitis vinifera] (GB:CAO40196.1); contains InterPro domain Protein of unknown function DUF537 (InterPro:IPR007491)	-1.59
MTP11	AT2G39450	ATMTP11/MTP11; cation transmembrane transporter/ manganese ion transmembrane transporter/ manganese:hydrogen antiporter	-1.59
AT5G62710	AT5G62710	leucine-rich repeat family protein / protein kinase family protein	-1.59
AT3G03060	AT3G03060	ATPase	-1.59
AT4G29480	AT4G29480	mitochondrial ATP synthase g subunit family protein	-1.59
AT3G19100	AT3G19100	calcium-dependent protein kinase, putative / CDPK, putative	-1.59
AHP3	AT5G39340	AHP3/ATHP2 (HISTIDINE-CONTAINING PHOSPHOTRANSMITTER 3); histidine phosphotransfer kinase	-1.59
PIP2B	AT2G37170	PIP2B (plasma membrane intrinsic protein 2;2); water channel	-1.58
AT1G76200	AT1G76200	similar to unknown [Populus trichocarpa x Populus deltoides] (GB:ABK96425.1)	-1.58
MRP4	AT2G47800	ATMRP4 (Arabidopsis thaliana multidrug resistance-associated protein 4)	-1.58
FLA2	AT4G12730	FLA2	-1.58
PMEPCRA	AT1G11580	ATPMEPCRA; pectinesterase	-1.58
AT1G53520	AT1G53520	chalcone-flavanone isomerase-related	-1.58
AT1G19835	AT1G19835	similar to unknown protein [Arabidopsis thaliana] (TAIR:AT1G47900.1); similar to unnamed protein product [Vitis vinifera] (GB:CAO48232.1); similar to hypothetical protein OsI_010472 [Oryza sativa (indica cultivar-group)] (GB:EAY89239.1); similar to hypothetical protein [Vitis vinifera] (GB:CAN60525.1); contains InterPro domain Protein of unknown function DUF869, plant (InterPro:IPR008587)	-1.58
LP1	AT2G38540	LIPID TRANSFER PROTEIN 1	-1.58
AT2G42910	AT2G42910	ribose-phosphate pyrophosphokinase 4 / phosphoribosyl diphosphate synthetase 4 (PRS4)	-1.58
AT1G10120	AT1G10120	DNA binding / transcription factor	-1.58
AT3G58650	AT3G58650	similar to unknown protein [Arabidopsis thaliana] (TAIR:AT5G26910.1); similar to unnamed protein product [Vitis vinifera] (GB:CAO17458.1)	-1.58
RIC2	AT1G27380	RIC2 (ROP-INTERACTIVE CRIB MOTIF-CONTAINING PROTEIN 2)	-1.58
PUB18	AT1G10560	armadillo/beta-catenin repeat family protein / U-box domain-containing protein	-1.58
AT1G71790	AT1G71790	F-actin capping protein beta subunit family protein	-1.58
AT5G22310	AT5G22310	similar to unknown protein [Arabidopsis thaliana] (TAIR:AT3G11590.1); similar to unnamed protein product [Vitis vinifera] (GB:CAO48696.1)	-1.58
CBR	AT5G17770	ATCBR (NADH:CYTOCHROME B5 REDUCTASE 1)	-1.58
XTH33	AT1G10550	XTH33 (xyloglucan:xyloglucosyl transferase 33); hydrolase, acting on glycosyl bonds	-1.58
TUA5	AT5G19780	[AT5G19780, TUA5 (tubulin alpha-5)];[AT5G19770, TUA3 (tubulin alpha-3)]	-1.58
scpl26	AT2G35780	SCPL26 (serine carboxypeptidase-like 26); serine carboxypeptidase	-1.58
AT3G12260	AT3G12260	complex 1 family protein / LVR family protein	-1.58
SAH7	AT4G08685	SAH7	-1.58
CRF4	AT4G27950	CRF4 (CYTOKININ RESPONSE FACTOR 4); DNA binding / transcription factor	-1.58
scpl29	AT4G30810	SCPL29 (serine carboxypeptidase-like 29); serine carboxypeptidase	-1.57
AT5G03870	AT5G03870	glutaredoxin family protein	-1.57
AT4G25870	AT4G25870	similar to unknown protein [Arabidopsis thaliana] (TAIR:AT5G57270.3); similar to unknown protein [Arabidopsis thaliana] (TAIR:AT5G57270.1); similar to unknown protein [Arabidopsis thaliana] (TAIR:AT5G57270.2); similar to unnamed protein product [Vitis vinifera] (GB:CAO64039.1); contains InterPro domain Protein of unknown function DUF266, plant (InterPro:IPR004949)	-1.57
AT2G47440	AT2G47440	DNAJ heat shock N-terminal domain-containing protein	-1.57
PAKRP1	AT4G14150	PAKRP1 (PHRAGMOPLAST-ASSOCIATED KINESIN-RELATED PROTEIN 1); microtubule motor/ plus-end-directed microtubule motor	-1.57
HVA22H	AT1G19950	HVA22H (HVA22-LIKE PROTEIN H (ATHVA22H))	-1.57
AT2G27730	AT2G27730	Identical to Uncharacterized mitochondrial protein At2g27730 [Arabidopsis Thaliana] (GB:Q9ZUX4;GB:Q8LBD1); similar to hypothetical protein [Vitis vinifera] (GB:CAN62125.1); similar to unnamed protein product [Vitis vinifera] (GB:CAO48731.1); contains domain PD199948 (PD199948)	-1.57
AT5G40860	AT5G40860	similar to unknown protein [Arabidopsis thaliana] (TAIR:AT3G27210.1); similar to hypothetical protein [Vitis vinifera] (GB:CAN62725.1)	-1.57
GPAT3	AT4G01950	ATGPAT3/GPAT3 (GLYCEROL-3-PHOSPHATE ACYLTRANSFERASE 3); acyltransferase	-1.57
AK-HSDH I	AT1G31230	AK-HSDH/AK-HSDH I (ASPARTATE KINASE-HOMOSERINE DEHYDROGENASE I); aspartate kinase/ homoserine dehydrogenase	-1.57
HB16	AT4G40060	ATHB-16/ATHB16 (ARABIDOPSIS THALIANA HOMEOBOX PROTEIN 16); transcription activator/ transcription factor	-1.57
SOT17	AT1G18590	sulfotransferase family protein	-1.57
ACT1	AT2G37620	ACT1 (ACTIN 1); structural constituent of cytoskeleton	-1.56
GLDP2	AT2G26080	ATGLDP2 (ARABIDOPSIS THALIANA GLYCINE DECARBOXYLASE P-PROTEIN 2); glycine dehydrogenase (decarboxylating)	-1.56
AT5G39320	AT5G39320	UDP-glucose 6-dehydrogenase, putative	-1.56
AT3G01450	AT3G01450	binding	-1.56
EDA21	AT4G13235	EDA21 (embryo sac development arrest 21)	-1.56
AT5G45670	AT5G45670	GDSL-motif lipase/hydrolase family protein	-1.56
AT3G52900	AT3G52900	similar to unknown protein [Arabidopsis thaliana] (TAIR:AT2G36355.1); similar to hypothetical protein [Vitis vinifera] (GB:CAN75481.1); similar to unnamed protein product [Vitis vinifera] (GB:CAO46538.1); contains InterPro domain Protein of unknown function DUF662 (InterPro:IPR007033)	-1.56
AT3G59980	AT3G59980	tRNA-binding region domain-containing protein	-1.56
CYP705A22	AT3G20130	CYP705A22 (cytochrome P450, family 705, subfamily A, polypeptide 22); oxygen binding	-1.56
AT3G10090	AT3G10090	40S ribosomal protein S28 (RPS28A)	-1.56
TBL25	AT1G01430	similar to unknown protein [Arabidopsis thaliana] (TAIR:AT4G01080.1); similar to unknown protein Cr17 [Brassica napus] (GB:AAX51387.1); contains InterPro domain Protein of unknown function DUF231, plant (InterPro:IPR004253)	-1.56
AT1G06120	AT1G06120	fatty acid desaturase family protein	-1.56
AT1G62520	AT1G62520	similar to unknown protein [Arabidopsis thaliana] (TAIR:AT4G22560.1); similar to AT1G62520 [Arabidopsis lyrata subsp. petraea] (GB:AAT72492.1); contains domain ADP-ribosylation (SSF56399)	-1.56
AT5G18800	AT5G18800	NADH-ubiquinone oxidoreductase 19 kDa subunit (NDUFA8) family protein	-1.56
AT5G61880	AT5G61880	signaling molecule-related	-1.56
NAI2	AT3G15950	(TSA1-LIKE); protein binding	-1.56
AT1G45207	AT1G45207	remorin family protein	-1.56
AT2G37510	AT2G37510	RNA-binding protein, putative	-1.56
AT1G11740	AT1G11740	ankyrin repeat family protein	-1.56
YCF37	AT2G23670	homolog of Synechocystis YCF37	-1.55
AT4G27435	AT4G27435	similar to unknown protein [Arabidopsis thaliana] (TAIR:AT3G15480.1); similar to fiber protein Fb34 [Gossypium barbadense] (GB:AAR07596.1); contains InterPro domain Protein of unknown function DUF1218 (InterPro:IPR009606)	-1.55
AT3G48490	AT3G48490	similar to unknown [Populus trichocarpa] (GB:ABK93013.1)	-1.55
AT3G53880	AT3G53880	aldo/keto reductase family protein	-1.55
AT2G35605	AT2G35605	SWIB complex BAF60b domain-containing protein	-1.55
COB	AT5G60920	COB (COBRA)	-1.55
AT2G11910	AT2G11910	unknown protein	-1.55
BCAT3	AT3G49680	ATBCAT-3/BCAT3 (BRANCHED-CHAIN AMINOTRANSFERASE 3); branched-chain-amino-acid transaminase/ catalytic	-1.55
HA2	AT4G30190	AHA2 (Arabidopsis H(+)-ATPase 2); ATPase	-1.55
SPK1	AT4G16340	SPK1 (SPIKE1); GTP binding / GTPase binding / binding / guanyl-nucleotide exchange factor	-1.55
AT2G35760	AT2G35760	integral membrane family protein	-1.55
AT3G50520	AT3G50520	phosphoglycerate/bisphosphoglycerate mutase family protein	-1.55
AT4G02940	AT4G02940	oxidoreductase, 2OG-Fe(II) oxygenase family protein	-1.55
AT1G67950	AT1G67950	[AT1G67940, ATNAP3 (Arabidopsis thaliana non-intrinsic ABC protein 3)];[AT1G67950, RNA recognition motif (RRM)-containing protein]	-1.55
AT4G29700	AT4G29700	type I phosphodiesterase/nucleotide pyrophosphatase family protein	-1.55
ATPMEPCRD	AT2G43050	ATPMEPCRD; pectinesterase	-1.55
AT1G05310	AT1G05310	pectinesterase family protein	-1.55
AT1G80120	AT1G80120	similar to unknown protein [Arabidopsis thaliana] (TAIR:AT3G15810.1); similar to unknown [Populus trichocarpa] (GB:ABK95691.1); contains InterPro domain Protein of unknown function DUF567 (InterPro:IPR007612)	-1.55
HA11	AT5G62670	AHA11 (ARABIDOPSIS H(+)-ATPASE 11); ATPase	-1.55
AT1G61795	AT1G61795	similar to RIC10 (ROP-INTERACTIVE CRIB MOTIF-CONTAINING PROTEIN 10) [Arabidopsis thaliana] (TAIR:AT4G04900.1); similar to unnamed protein product [Vitis vinifera] (GB:CAO69681.1); contains InterPro domain PAK-box/P21-Rho-binding (InterPro:IPR000095)	-1.55
ATL3	AT1G72310	ATL3 (Arabidopsis T?xicos en Levadura 3); protein binding / zinc ion binding	-1.54
AT2G21300	AT2G21300	kinesin motor family protein	-1.54
AT1G06010	AT1G06010	unknown protein	-1.54
TOZ	AT5G16750	TOZ (TORMOZEMBRYO DEFECTIVE); nucleotide binding	-1.54
AT3G47833	AT3G47833	similar to unknown protein [Arabidopsis thaliana] (TAIR:AT5G62575.1); similar to unnamed protein product [Vitis vinifera] (GB:CAO64387.1)	-1.54
MIPS2	AT2G22240	inositol-3-phosphate synthase isozyme 2 / myo-inositol-1-phosphate synthase 2 / MI-1-P synthase 2 / IPS 2	-1.54
PD1	AT2G27820	PD1 (PREPHENATE DEHYDRATASE 1); arogenate dehydratase/ prephenate dehydratase	-1.54
AT4G38080	AT4G38080	hydroxyproline-rich glycoprotein family protein	-1.54
SRF7	AT3G14350	SRF7 (STRUBBELIG-RECEPTOR FAMILY 7); ATP binding / protein serine/threonine kinase	-1.54
AT1G63850	AT1G63850	PRLI-interacting factor-related	-1.54
CDKB1;2	AT2G38620	CDKB1;2 (cyclin-dependent kinase B1;2); kinase	-1.54
AT2G07170	AT2G07170	binding	-1.54
SHA1	AT5G63780	SHA1 (SHOOT APICAL MERISTEM ARREST 1); protein binding / zinc ion binding	-1.54
AO1	AT4G14940	ATAO1 (Arabidosis thaliana amine oxidase 1); copper ion binding	-1.54
TTN5	AT2G18390	TTN5 (TITAN 5); GTP binding	-1.54
RHD6	AT1G66470	basic helix-loop-helix (bHLH) family protein	-1.53
AT5G45470	AT5G45470	similar to unknown protein [Arabidopsis thaliana] (TAIR:AT5G45530.1); similar to unknown protein [Arabidopsis thaliana] (TAIR:AT5G45540.1); similar to unknown protein [Arabidopsis thaliana] (TAIR:AT5G45460.1); similar to unnamed protein product [Vitis vinifera] (GB:CAO39193.1); contains InterPro domain Protein of unknown function DUF594 (InterPro:IPR007658)	-1.53
AT1G52980	AT1G52980	GTP-binding family protein	-1.53
AT3G53100	AT3G53100	GDSL-motif lipase/hydrolase family protein	-1.53
AT2G37500	AT2G37500	arginine biosynthesis protein ArgJ family	-1.53
AT2G36130	AT2G36130	peptidyl-prolyl cis-trans isomerase, putative / cyclophilin, putative / rotamase, putative	-1.53
RFC3	AT3G17170	RFC3 (REGULATOR OF FATTY-ACID COMPOSITION 3); structural constituent of ribosome	-1.53
AT4G23870	AT4G23870	similar to unknown protein [Arabidopsis thaliana] (TAIR:AT4G11020.1)	-1.53
AT1G49230	AT1G49230	zinc finger (C3HC4-type RING finger) family protein	-1.53
AT4G34265	AT4G34265	similar to unknown protein [Arabidopsis thaliana] (TAIR:AT2G15000.3); similar to unknown protein [Arabidopsis thaliana] (TAIR:AT2G15000.2); similar to unnamed protein product [Vitis vinifera] (GB:CAO70855.1)	-1.53
AT1G14390	AT1G14390	leucine-rich repeat transmembrane protein kinase, putative	-1.53
GA3OX1	AT1G15550	GA4 (GA REQUIRING 4); gibberellin 3-beta-dioxygenase	-1.53
BARS1	AT4G15370	BARS1 (BARUOL SYNTHASE 1); catalytic	-1.53
AT2G34170	AT2G34170	similar to unknown protein [Arabidopsis thaliana] (TAIR:AT1G29240.1); similar to unnamed protein product [Vitis vinifera] (GB:CAO48048.1); contains InterPro domain Protein of unknown function DUF688 (InterPro:IPR007789)	-1.53
AT4G37550	AT4G37550	formamidase, putative / formamide amidohydrolase, putative	-1.53
BIOF	AT5G04620	ATBIOF; transaminase	-1.53
NIK2	AT3G25560	NIK2 (NSP-INTERACTING KINASE 2); protein kinase	-1.53
AT2G32380	AT2G32380	similar to unknown protein [Arabidopsis thaliana] (TAIR:AT1G05210.1); similar to unnamed protein product [Vitis vinifera] (GB:CAO24140.1); contains InterPro domain Transmembrane protein 97, predicted (InterPro:IPR016964)	-1.53
ACA4	AT2G41560	ACA4 (AUTO-INHIBITED CA(2+)-ATPASE, ISOFORM 4); calcium-transporting ATPase/ calmodulin binding	-1.53
AT5G62890	AT5G62890	permease, putative	-1.53
AT1G67050	AT1G67050	similar to unknown protein [Arabidopsis thaliana] (TAIR:AT5G38320.1); similar to unknown protein [Arabidopsis thaliana] (TAIR:AT5G38320.2); similar to At1g67050-like protein [Arabidopsis lyrata subsp. petraea] (GB:ABY59212.1)	-1.53
DGL1	AT5G66680	DGL1 (defective glycosylation 1); dolichyl-diphosphooligosaccharide-protein glycotransferase	-1.52
AT1G33610	AT1G33610	leucine-rich repeat family protein	-1.52
RUXF	AT4G30220	RUXF (SMALL NUCLEAR RIBONUCLEOPROTEIN F)	-1.52
AT1G23030	AT1G23030	armadillo/beta-catenin repeat family protein / U-box domain-containing protein	-1.52
AZG2	AT5G50300	xanthine/uracil/vitamin C permease family protein	-1.52
AtHB23	AT1G26960	ATHB23 (ARABIDOPSIS THALIANA HOMEOBOX PROTEIN 23); DNA binding / transcription factor	-1.52
ZW9	AT1G58270	ZW9	-1.52
IPP2	AT3G02780	IDI2/IPIAT1/IPP2 (ISOPENTENYL DIPHOSPHATE ISOMERASE 2, ISOPENTENYL PYROPHOSPHATE:DIMETHYLLALLYL PYROPHOSPHATE ISOMERASE 2); isopentenyl-diphosphate delta-isomerase	-1.52
ADF4	AT5G59890	ADF4 (ACTIN DEPOLYMERIZING FACTOR 4); actin binding	-1.52
FD3	AT2G27510	ATFD3 (FERREDOXIN 3); electron carrier	-1.52
AT5G35740	AT5G35740	glycosyl hydrolase family protein 17	-1.52
GATL6	AT4G02130	GATL6/LGT10; polygalacturonate 4-alpha-galacturonosyltransferase/ transferase, transferring glycosyl groups / transferase, transferring hexosyl groups	-1.52
AT3G57060	AT3G57060	binding	-1.52
AT1G68040	AT1G68040	S-adenosyl-L-methionine:carboxyl methyltransferase family protein	-1.52
AT4G35030	AT4G35030	protein kinase family protein	-1.52
SAC52	AT1G14320	60S ribosomal protein L10 (RPL10A) / Wilm's tumor suppressor protein-related	-1.52
AT2G36200	AT2G36200	P-loop containing nucleoside triphosphate hydrolases superfamily protein	-1.52
AT1G18320	AT1G18320	[AT1G18320, mitochondrial import inner membrane translocase subunit Tim17/Tim22/Tim23 family protein];[AT3G10110, MEE67 (maternal effect embryo arrest 67); P-P-bond-hydrolysis-driven protein transmembrane transporter]	-1.52
AT3G17780	AT3G17780	similar to unknown protein [Arabidopsis thaliana] (TAIR:AT1G48440.1); similar to unknown [Populus trichocarpa] (GB:ABK93075.1)	-1.52
RHM1	AT1G78570	RHM1/ROL1 (RHAMNOSE BIOSYNTHESIS1); UDP-L-rhamnose synthase/ UDP-glucose 4,6-dehydratase/ catalytic	-1.52
AT2G36160	AT2G36160	40S ribosomal protein S14 (RPS14A)	-1.52
RHS15	AT4G25220	transporter, putative	-1.52
AT5G66330	AT5G66330	leucine-rich repeat family protein	-1.52
AT2G19660	AT2G19660	DC1 domain-containing protein	-1.52
RIC4	AT5G16490	RIC4 (ROP-INTERACTIVE CRIB MOTIF-CONTAINING PROTEIN 4)	-1.52
AT5G09480	AT5G09480	hydroxyproline-rich glycoprotein family protein	-1.52
AT3G42660	AT3G42660	nucleotide binding	-1.52
ANL2	AT4G00730	ANL2 (ANTHOCYANINLESS 2); transcription factor	-1.52
ESK1	AT3G55990	Encodes ESK1 (Eskimo1). A member of a large gene family of DUF231 domain proteins whose members encode a total of 45 proteins of unknown function. ESK1 functions as a negative regulator of cold acclimation. Mutations in the ESK1 gene provides strong freezing tolerance.	-1.52
ZIP10	AT1G31260	ZIP10 (ZINC TRANSPORTER 10 PRECURSOR); cation transmembrane transporter/ metal ion transmembrane transporter	-1.51
CB5LP	AT1G60660	B5 #5 (cytochrome b5 family protein #5); heme binding / transition metal ion binding	-1.51
iqd33	AT5G35670	IQD33 (IQ-domain 33); calmodulin binding	-1.51
AT5G53070	AT5G53070	ribosomal protein L9 family protein	-1.51
AT5G05960	AT5G05960	protease inhibitor/seed storage/lipid transfer protein (LTP) family protein	-1.51
AT2G31010	AT2G31010	protein kinase family protein	-1.51
ROPGEF3	AT4G00460	ATROPGEF3/ROPGEF3 (KINASE PARTNER PROTEIN-LIKE); Rho guanyl-nucleotide exchange factor/	-1.51
iqd9	AT2G33990	IQD9 (IQ-domain 9); calmodulin binding	-1.51
TPX2	AT1G03780	targeting protein-related	-1.51
RABG3d	AT1G52280	AtRABG3d (Arabidopsis Rab GTPase homolog G3d); GTP binding	-1.51
NPY2	AT2G14820	phototropic-responsive NPH3 family protein	-1.51
OFP3	AT5G58360	ATOFP3/OFP3 (Arabidopsis thaliana ovate family protein 3)	-1.51
FAD2	AT3G12120	FAD2 (FATTY ACID DESATURASE 2); delta12-fatty acid dehydrogenase	-1.51
AT1G05660	AT1G05660	polygalacturonase, putative / pectinase, putative	-1.51
AT4G32785	AT4G32785	similar to unknown protein [Arabidopsis thaliana] (TAIR:AT3G63300.1); similar to unknown protein [Arabidopsis thaliana] (TAIR:AT3G63300.2); similar to unnamed protein product [Vitis vinifera] (GB:CAO44042.1); contains InterPro domain Pleckstrin-like, plant (InterPro:IPR013666); contains InterPro domain Pleckstrin-like (InterPro:IPR001849)	-1.51
TFL1	AT5G03840	TFL1 (TERMINAL FLOWER 1); phosphatidylethanolamine binding	-1.51
TIM	AT2G21170	TIM (TRIOSEPHOSPHATE ISOMERASE); triose-phosphate isomerase	-1.51
PAB4	AT2G23350	PAB4 (POLY(A) BINDING PROTEIN 4); RNA binding / translation initiation factor	-1.51
XTH9	AT4G03210	XTH9 (XYLOGLUCAN ENDOTRANSGLUCOSYLASE/HYDROLASE 9); hydrolase, acting on glycosyl bonds	-1.51
AT2G33570	AT2G33570	similar to unknown protein [Arabidopsis thaliana] (TAIR:AT5G44670.1); similar to unnamed protein product [Vitis vinifera] (GB:CAO66312.1); similar to hypothetical protein [Vitis vinifera] (GB:CAN76802.1); contains InterPro domain Protein of unknown function DUF23 (InterPro:IPR008166)	-1.50
emb2386	AT1G02780	EMB2386 (EMBRYO DEFECTIVE 2386); structural constituent of ribosome	-1.50
AT5G65860	AT5G65860	ankyrin repeat family protein	-1.50
HSK	AT2G17265	HSK (HOMOSERINE KINASE); homoserine kinase	-1.50
HAM1	AT2G45160	scarecrow transcription factor family protein	-1.50
AT3G13480	AT3G13480	similar to unknown protein [Arabidopsis thaliana] (TAIR:AT1G55475.1); similar to unnamed protein product [Vitis vinifera] (GB:CAO22098.1)	-1.50
HIS4	AT2G28740	HIS4 (Histone H4)	-1.50
GR-RBP2	AT4G13850	ATGRP2 (GLYCINE-RICH RNA-BINDING PROTEIN 2); RNA binding / double-stranded DNA binding / single-stranded DNA binding	-1.50
AT2G26360	AT2G26360	binding	-1.50
PTAC7	AT5G24314	PDE225/PTAC7 (PIGMENT DEFECTIVE 225)	-1.50
IMD3	AT1G31180	3-isopropylmalate dehydrogenase, chloroplast, putative	-1.50
APC6	AT1G78770	cell division cycle family protein	-1.50
AT1G74210	AT1G74210	glycerophosphoryl diester phosphodiesterase family protein	-1.50
SULTR3;5	AT5G19600	SULTR3;5; sulfate transmembrane transporter	-1.50
AT4G36420	AT4G36420	ribosomal protein L12 family protein	-1.50
RABA5b	AT3G07410	AtRABA5b (Arabidopsis Rab GTPase homolog A5b); GTP binding	-1.50
AT3G13600	AT3G13600	calmodulin-binding family protein	-1.50
AT2G17550	AT2G17550	similar to unknown protein [Arabidopsis thaliana] (TAIR:AT5G02390.1); similar to unnamed protein product [Vitis vinifera] (GB:CAO14481.1)	-1.50
AT5G45480	AT5G45480	similar to unknown protein [Arabidopsis thaliana] (TAIR:AT5G45470.1); similar to unknown protein [Arabidopsis thaliana] (TAIR:AT5G45530.1); similar to unknown protein [Arabidopsis thaliana] (TAIR:AT5G45540.1); similar to unnamed protein product [Vitis vinifera] (GB:CAO39193.1); contains InterPro domain Protein of unknown function DUF594 (InterPro:IPR007658)	-1.50
UGLYAH	AT4G17050	transcription factor	-1.50
AGL20	AT2G45660	AGL20 (AGAMOUS-LIKE 20); transcription factor	-1.50
mtHsc70-1	AT4G37910	MTHSC70-1 (mitochondrial heat shock protein 70-1); ATP binding / unfolded protein binding	-1.50
AT3G26720	AT3G26720	glycosyl hydrolase family 38 protein	-1.50
AT5G63500	AT5G63500	similar to unknown protein [Arabidopsis thaliana] (TAIR:AT3G48660.1); similar to hypothetical protein [Phaseolus vulgaris] (GB:AAQ09000.1)	-1.50
AT3G56130	AT3G56130	biotin/lipoyl attachment domain-containing protein	-1.49
AT2G40510	AT2G40510	40S ribosomal protein S26 (RPS26A)	-1.49
VDAC1	AT3G01280	porin, putative	-1.49
AT2G44300	AT2G44300	lipid transfer protein-related	-1.49
LAX2	AT2G21050	amino acid permease, putative	-1.49
AT2G20360	AT2G20360	binding / catalytic/ coenzyme binding	-1.49
AT5G50000	AT5G50000	protein kinase, putative	-1.49
NOP10	AT2G20490	EDA27/NOP10 (embryo sac development arrest 27); RNA binding	-1.49
SMO2-1	AT1G07420	SMO2-2 (sterol 4-alpha-methyl-oxidase 2); C-4 methylsterol oxidase	-1.49
AT1G13670	AT1G13670	unknown protein	-1.49
emb2171	AT3G04400	EMB2171 (EMBRYO DEFECTIVE 2171); structural constituent of ribosome	-1.49
BAG1	AT5G52060	ATBAG1 (ARABIDOPSIS THALIANA BCL-2-ASSOCIATED ATHANOGENE 1); protein binding	-1.49
UK/UPRT1	AT5G40870	ATUK/UPRT1 (URIDINE KINASE/URACIL PHOSPHORIBOSYLTRANSFERASE 1); ATP binding / kinase/ uracil phosphoribosyltransferase/ uridine kinase	-1.49
BG_PPAP	AT5G42100	ATBG_PAP/ATBG_PPAP (A. THALIANA BETA-1,3-GLUCANASE_PUTATIVE); glucan endo-1,3-beta-D-glucosidase/ hydrolase, hydrolyzing O-glycosyl compounds	-1.49
HK5	AT5G10720	AHK5 (CYTOKININ INDEPENDENT 2)	-1.49
IAA8	AT2G22670	IAA8 (indoleacetic acid-induced protein 8); transcription factor	-1.49
AT2G25510	AT2G25510	unknown protein	-1.49
AT1G26750	AT1G26750	similar to unnamed protein product [Vitis vinifera] (GB:CAO68449.1); similar to hypothetical protein [Vitis vinifera] (GB:CAN72786.1)	-1.49
AT5G42530	AT5G42530	unknown protein	-1.49
AT5G04160	AT5G04160	phosphate translocator-related	-1.49
TIM9	AT3G46560	TIM9 (EMBRYO DEFECTIVE 2474); P-P-bond-hydrolysis-driven protein transmembrane transporter	-1.49
HDT4	AT2G27840	HDT4 (histone deacetylase 13)	-1.49
AK-LYS1	AT5G13280	AK-LYS1 (ASPARTATE KINASE 1)	-1.49
AT2G05920	AT2G05920	subtilase family protein	-1.48
AT3G15640	AT3G15640	cytochrome c oxidase family protein	-1.48
GAUT12	AT5G54690	GAUT12/IRX8/LGT6 (GALACTURONOSYLTRANSFERASE 12); polygalacturonate 4-alpha-galacturonosyltransferase/ transferase, transferring glycosyl groups / transferase, transferring hexosyl groups	-1.48
AT5G25590	AT5G25590	similar to unknown protein [Arabidopsis thaliana] (TAIR:AT1G52320.3); similar to unknown protein [Arabidopsis thaliana] (TAIR:AT1G52320.4); similar to unknown protein [Arabidopsis thaliana] (TAIR:AT1G52320.2); similar to unnamed protein product [Vitis vinifera] (GB:CAO44106.1); contains InterPro domain Actin-binding FH2 (InterPro:IPR015425); contains InterPro domain Protein of unknown function DU…	-1.48
AT1G25260	AT1G25260	acidic ribosomal protein P0-related	-1.48
AT3G44590	AT3G44590	60S acidic ribosomal protein P2 (RPP2D)	-1.48
AT4G34800	AT4G34800	auxin-responsive family protein	-1.48
AT5G24313	AT5G24313	unknown protein	-1.48
AT5G06050	AT5G06050	dehydration-responsive protein-related	-1.48
AT3G09280	AT3G09280	unknown protein	-1.48
AT4G11780	AT4G11780	similar to unknown protein [Arabidopsis thaliana] (TAIR:AT4G23020.1); similar to hypothetical protein [Vitis vinifera] (GB:CAN60407.1)	-1.48
AT2G38390	AT2G38390	peroxidase, putative	-1.48
IPP1	AT5G16440	IPP1 (ISOPENTENYL DIPHOSPHATE ISOMERASE 1); isopentenyl-diphosphate delta-isomerase	-1.48
HMG2	AT2G17370	HMG2 (3-HYDROXY-3-METHYLGLUTARYL-COA REDUCTASE 2)	-1.48
AT3G29360	AT3G29360	UDP-glucose 6-dehydrogenase, putative	-1.48
AT5G09770	AT5G09770	ribosomal protein L17 family protein	-1.48
AT2G42320	AT2G42320	nucleolar protein gar2-related	-1.47
GLX1	AT1G11840	ATGLX1 (GLYOXALASE I HOMOLOG); lactoylglutathione lyase	-1.47
BTR1L	AT5G04430	KH domain-containing protein NOVA, putative	-1.47
VLN1	AT2G29890	VLN1 (VILLIN 1); actin binding	-1.47
BAM1	AT5G65700	BAM1 (big apical meristem 1); ATP binding / kinase/ protein serine/threonine kinase	-1.47
AT2G38740	AT2G38740	haloacid dehalogenase-like hydrolase family protein	-1.47
AT5G15740	AT5G15740	similar to unknown protein [Arabidopsis thaliana] (TAIR:AT3G02250.1); similar to hypothetical protein [Cleome spinosa] (GB:ABD96934.1); similar to unnamed protein product [Vitis vinifera] (GB:CAO49221.1); similar to hypothetical protein [Cleome spinosa] (GB:ABD96844.1); contains InterPro domain Protein of unknown function DUF246, plant (InterPro:IPR004348)	-1.47
AT1G30690	AT1G30690	SEC14 cytosolic factor family protein / phosphoglyceride transfer family protein	-1.47
AT1G74060	AT1G74060	60S ribosomal protein L6 (RPL6B)	-1.47
POK2	AT3G19050	POK2 (PHRAGMOPLAST ORIENTING KINESIN 2); microtubule motor	-1.47
CIPK3	AT2G26980	CIPK3 (CBL-INTERACTING PROTEIN KINASE 3); kinase/ protein kinase	-1.47
CXE18	AT5G23530	ATCXE18 (ARABIDOPSIS THALIANA CARBOXYESTERASE 18); carboxylesterase	-1.47
AT3G22415	AT3G22415	unknown protein	-1.47
TBL24	AT4G23790	similar to unknown protein [Arabidopsis thaliana] (TAIR:AT4G11090.1); similar to hypothetical protein [Vitis vinifera] (GB:CAN70903.1); contains InterPro domain Protein of unknown function DUF231, plant (InterPro:IPR004253)	-1.47
AT1G63050	AT1G63050	membrane bound O-acyl transferase (MBOAT) family protein	-1.47
AT2G23690	AT2G23690	similar to unknown protein [Arabidopsis thaliana] (TAIR:AT4G37240.1); similar to unnamed protein product [Vitis vinifera] (GB:CAO41608.1); similar to unnamed protein product [Vitis vinifera] (GB:CAO45438.1); similar to hypothetical protein [Vitis vinifera] (GB:CAN61825.1)	-1.47
TUB2	AT5G62690	TUB2 (Tubulin beta-2); structural molecule	-1.47
AT3G12540	AT3G12540	similar to unknown protein [Arabidopsis thaliana] (TAIR:AT2G39690.1); similar to At3g12540-like protein [Boechera stricta] (GB:ABB89771.1); contains InterPro domain Protein of unknown function DUF547 (InterPro:IPR006869)	-1.47
LEP	AT5G13910	LEP (LEAFY PETIOLE); DNA binding / transcription factor	-1.47
AT1G03830	AT1G03830	guanylate-binding family protein	-1.47
AT2G37950	AT2G37950	zinc finger (C3HC4-type RING finger) family protein	-1.47
AT4G38690	AT4G38690	1-phosphatidylinositol phosphodiesterase-related	-1.46
CDC6	AT2G29680	CDC6	-1.46
AT3G03960	AT3G03960	chaperonin, putative	-1.46
AT5G58000	AT5G58000	CPL4 (C-TERMINAL DOMAIN PHOSPHATASE-LIKE 4)	-1.46
AT2G26730	AT2G26730	leucine-rich repeat transmembrane protein kinase, putative	-1.46
AT3G13674	AT3G13674	similar to unknown protein [Arabidopsis thaliana] (TAIR:AT1G55205.1)	-1.46
CRF3	AT5G53290	CRF3 (CYTOKININ RESPONSE FACTOR 3); DNA binding / transcription factor	-1.46
RPL15	AT3G25920	RPL15 (ribosomal protein L15)	-1.46
AT5G65158	AT5G65158	similar to lipid-associated family protein [Arabidopsis thaliana] (TAIR:AT2G22170.1); similar to unknown [Populus trichocarpa] (GB:ABK93810.1); contains InterPro domain Lipase/lipooxygenase, PLAT/LH2 (InterPro:IPR008976); contains InterPro domain Lipoxygenase, LH2 (InterPro:IPR001024)	-1.46
AT2G33840	AT2G33840	tRNA synthetase class I (W and Y) family protein	-1.46
TCP-1	AT3G20050	ATTCP-1 (Arabidopsis thaliana T-complex protein 1 alpha subunit); ATP binding / protein binding / unfolded protein binding	-1.46
AT4G22000	AT4G22000	similar to hypothetical protein [Vitis vinifera] (GB:CAN76661.1)	-1.46
AT5G58990	AT5G58990	similar to unknown protein [Arabidopsis thaliana] (TAIR:AT5G52370.1); similar to unnamed protein product [Vitis vinifera] (GB:CAO21535.1)	-1.46
AT4G12360	AT4G12360	protease inhibitor/seed storage/lipid transfer protein (LTP) family protein	-1.46
AT3G13150	AT3G13150	pentatricopeptide (PPR) repeat-containing protein	-1.46
AT1G53380	AT1G53380	similar to unknown protein [Arabidopsis thaliana] (TAIR:AT3G14870.1); similar to unknown protein [Arabidopsis thaliana] (TAIR:AT3G14870.2); similar to unknown protein [Arabidopsis thaliana] (TAIR:AT3G14870.3); similar to hypothetical protein [Vitis vinifera] (GB:CAN72546.1); contains InterPro domain Protein of unknown function DUF641, plant (InterPro:IPR006943)	-1.46
AT3G13845	AT3G13845	unknown protein	-1.46
RS27A	AT3G61110	ARS27A (ARABIDOPSIS RIBOSOMAL PROTEIN S27); structural constituent of ribosome	-1.46
AT4G24130	AT4G24130	similar to unknown protein [Arabidopsis thaliana] (TAIR:AT1G56580.1); similar to unnamed protein product [Vitis vinifera] (GB:CAO62919.1); contains InterPro domain Protein of unknown function DUF538 (InterPro:IPR007493)	-1.46
RAX2	AT2G36890	ATMYB38/MYB38/RAX2 (myb domain protein 38); DNA binding / transcription factor	-1.46
AT5G59070	AT5G59070	glycosyl transferase family 1 protein	-1.46
RANGAP1	AT3G63130	RANGAP1 (RAN GTPASE ACTIVATING PROTEIN 1); RAN GTPase activator	-1.46
OASC	AT3G59760	OASC (O-ACETYLSERINE (THIOL) LYASE ISOFORM C); cysteine synthase	-1.46
PPC1	AT1G53310	ATPPC1 (PHOSPHOENOLPYRUVATE CARBOXYLASE 1); phosphoenolpyruvate carboxylase	-1.46
AT2G40360	AT2G40360	transducin family protein / WD-40 repeat family protein	-1.46
EMB3010	AT5G10360	EMB3010 (EMBRYO DEFECTIVE 3010); structural constituent of ribosome	-1.46
TMK1	AT1G66150	TMK1 (TRANSMEMBRANE KINASE 1)	-1.46
AT5G24580	AT5G24580	copper-binding family protein	-1.46
AGP9	AT2G14890	ARABINOGALACTAN PROTEIN 9	-1.46
AT5G11750	AT5G11750	ribosomal protein L19 family protein	-1.45
ARA12	AT5G67360	ARA12; subtilase	-1.45
AT1G29270	AT1G29270	similar to transcription regulator [Arabidopsis thaliana] (TAIR:AT2G40435.1); similar to hypothetical protein [Vitis vinifera] (GB:CAN79056.1); similar to unnamed protein product [Vitis vinifera] (GB:CAO48025.1)	-1.45
HTA8	AT2G38810	HTA8; DNA binding	-1.45
PAI1	AT1G07780	[AT5G05590, PAI2 (PHOSPHORIBOSYLANTHRANILATE ISOMERASE 2); phosphoribosylanthranilate isomerase];[AT1G07780, PAI1 (PHOSPHORIBOSYLANTHRANILATE ISOMERASE 1); phosphoribosylanthranilate isomerase]	-1.45
BAT5	AT4G12030	BILE ACID TRANSPORTER 5	-1.45
AT5G23535	AT5G23535	KOW domain-containing protein	-1.45
MGP1	AT2G21870	Identical to Probable ATP synthase 24 kDa subunit, mitochondrial precursor [Arabidopsis Thaliana] (GB:Q9SJ12;GB:Q8LBN3); similar to unnamed protein product [Vitis vinifera] (GB:CAO71749.1)	-1.45
AT1G05835	AT1G05835	similar to unknown protein [Arabidopsis thaliana] (TAIR:AT1G32583.1); contains domain PTHR13793:SF28 (PTHR13793:SF28); contains domain PTHR13793 (PTHR13793)	-1.45
AT5G23903	AT5G23903	similar to unknown protein [Arabidopsis thaliana] (TAIR:AT1G07680.1)	-1.45
AT2G28080	AT2G28080	glycosyltransferase family protein	-1.45
ATWHY2	AT1G71260	ATWHY2 (A. THALIANA WHIRLY 2); DNA binding	-1.45
CBL2	AT5G55990	CBL2 (calcineurin B-like protein 2); calcium ion binding	-1.45
GOS12	AT2G45200	GOS12 (GOLGI SNARE 12); SNARE binding	-1.45
AT1G54000	AT1G54000	myrosinase-associated protein, putative	-1.45
AT2G25480	AT2G25480	similar to unknown protein [Arabidopsis thaliana] (TAIR:AT4G32330.3); similar to unknown protein [Arabidopsis thaliana] (TAIR:AT4G32330.2); similar to unknown protein [Arabidopsis thaliana] (TAIR:AT4G32330.1); similar to unnamed protein product [Vitis vinifera] (GB:CAO44238.1); contains InterPro domain Targeting for Xklp2 (InterPro:IPR009675)	-1.45
AT1G61770	AT1G61770	DNAJ heat shock N-terminal domain-containing protein	-1.45
AT2G37470	AT2G37470	histone H2B, putative	-1.45
AT3G54390	AT3G54390	transcription factor	-1.45
HB1	AT2G16060	AHB1 (ARABIDOPSIS HEMOGLOBIN 1)	-1.45
AT1G07830	AT1G07830	ribosomal protein L29 family protein	-1.45
MSL4	AT1G53470	mechanosensitive ion channel domain-containing protein / MS ion channel domain-containing protein	-1.45
PYK10	AT3G09260	beta-glucosidase	-1.44
AT5G16060	AT5G16060	similar to hypothetical protein [Cleome spinosa] (GB:ABD96913.1); contains domain PD069074 (PD069074)	-1.44
GATA4	AT3G60530	zinc finger (GATA type) family protein	-1.44
AT2G24290	AT2G24290	similar to unknown protein [Arabidopsis thaliana] (TAIR:AT4G30996.1); similar to H0311C03.8 [Oryza sativa (indica cultivar-group)] (GB:CAH67554.1); contains InterPro domain Protein of unknown function DUF1068 (InterPro:IPR010471)	-1.44
B70	AT4G21340	B70; transcription factor	-1.44
GA2	AT1G79460	GA2 (GA REQUIRING 2); ent-kaurene synthase	-1.44
CYP735A1	AT5G38450	CYP735A1 (cytochrome P450, family 735, subfamily A, polypeptide 1); oxygen binding	-1.44
AT4G23590	AT4G23590	aminotransferase class I and II family protein	-1.44
AT1G03920	AT1G03920	protein kinase, putative	-1.44
AT3G08610	AT3G08610	similar to unnamed protein product [Vitis vinifera] (GB:CAO64059.1); similar to hypothetical protein MtrDRAFT_AC136139g5v2 [Medicago truncatula] (GB:ABE93033.1)	-1.44
POM1	AT1G05850	POM1 (POM-POM1); chitinase	-1.44
NUC-L1	AT1G48920	ATNUC-L1/PARL1 (PARALLEL 1); nucleic acid binding	-1.44
PLA2-ALPHA	AT2G06925	ATSPLA2-ALPHA/PLA2-ALPHA (PHOSPHOLIPASE A2-ALPHA); phospholipase A2	-1.44
CYCA3;2	AT1G47210	CYCA3;2; cyclin-dependent protein kinase	-1.44
CBL9	AT5G47100	CBL9 (Calcineurin B-like protein 9); calcium ion binding	-1.44
FKD1	AT3G63300	similar to unknown protein [Arabidopsis thaliana] (TAIR:AT3G22810.1); similar to hypothetical protein [Vitis vinifera] (GB:CAN81204.1); contains InterPro domain Pleckstrin-like, plant (InterPro:IPR013666); contains InterPro domain Protein of unknown function DUF828, plant (InterPro:IPR008546)	-1.44
AT1G74160	AT1G74160	similar to unknown protein [Arabidopsis thaliana] (TAIR:AT1G18620.2); similar to unknown protein [Arabidopsis thaliana] (TAIR:AT1G18620.1); similar to unnamed protein product [Vitis vinifera] (GB:CAO49165.1)	-1.44
AT5G62170	AT5G62170	similar to unknown protein [Arabidopsis thaliana] (TAIR:AT5G51850.1); similar to unnamed protein product [Vitis vinifera] (GB:CAO17701.1)	-1.44
G6PD2	AT5G13110	G6PD2 (GLUCOSE-6-PHOSPHATE DEHYDROGENASE 2); glucose-6-phosphate dehydrogenase	-1.44
AT3G53740	AT3G53740	60S ribosomal protein L36 (RPL36B)	-1.44
RPL16A	AT2G42740	RPL16A (ribosomal protein large subunit 16A); structural constituent of ribosome	-1.44
KINESIN-12B	AT3G23670	KINESIN-12B/PAKRP1L; microtubule motor/ plus-end-directed microtubule motor	-1.44
AT3G20820	AT3G20820	leucine-rich repeat family protein	-1.44
AT1G03230	AT1G03230	extracellular dermal glycoprotein, putative / EDGP, putative	-1.44
AT3G61560	AT3G61560	reticulon family protein (RTNLB6)	-1.43
NFD1	AT4G30930	NFD1 (NUCLEAR FUSION DEFECTIVE 1); structural constituent of ribosome	-1.43
IPT3	AT3G63110	ATIPT3 (Arabidopsis thaliana isopentenyltransferase 3); transferase, transferring alkyl or aryl (other than methyl) groups	-1.43
FRO1	AT5G67590	FRO1 (FROSTBITE1)	-1.43
AT4G13180	AT4G13180	short-chain dehydrogenase/reductase (SDR) family protein	-1.43
AT4G02620	AT4G02620	(VACUOLAR ATPASE SUBUNIT F); hydrogen ion transporting ATP synthase, rotational mechanism / hydrogen ion transporting ATPase, rotational mechanism	-1.43
PRMT10	AT1G04870	protein arginine N-methyltransferase family protein	-1.43
AT1G64920	AT1G64920	glycosyltransferase family protein	-1.43
AT4G20430	AT4G20430	subtilase family protein	-1.43
IAR4	AT1G24180	IAR4 (IAA-conjugate-resistant 4); pyruvate dehydrogenase (acetyl-transferring)	-1.43
AT2G31410	AT2G31410	similar to unknown [Populus trichocarpa] (GB:ABK95063.1)	-1.43
AT5G38610	AT5G38610	invertase/pectin methylesterase inhibitor family protein	-1.43
CYCA1;1	AT1G44110	CYCA1;1 (CYCLIN A1;1); cyclin-dependent protein kinase regulator	-1.43
AT4G31890	AT4G31890	armadillo/beta-catenin repeat family protein	-1.43
PDLP2	AT1G04520	33 kDa secretory protein-related	-1.43
AT1G80320	AT1G80320	[AT1G80325, other RNA];[AT1G80320, oxidoreductase, 2OG-Fe(II) oxygenase family protein]	-1.43
AT2G44640	AT2G44640	similar to PDE320 (PIGMENT DEFECTIVE 320) [Arabidopsis thaliana] (TAIR:AT3G06960.1); similar to unnamed protein product [Vitis vinifera] (GB:CAO70456.1)	-1.43
CYS1	AT5G12140	ATCYS1 (A. THALIANA CYSTATIN-1); cysteine protease inhibitor	-1.43
AT2G46000	AT2G46000	[AT2G46000, similar to unnamed protein product [Vitis vinifera] (GB:CAO39633.1)];[AT2G45990, similar to unnamed protein product [Vitis vinifera] (GB:CAO39632.1); contains domain HAD-like (SSF56784)]	-1.43
AT2G28600	AT2G28600	ATP binding / ATP-dependent helicase/ nucleic acid binding	-1.43
AT5G62270	AT5G62270	similar to mucin-related [Arabidopsis thaliana] (TAIR:AT2G02880.1); similar to unnamed protein product [Vitis vinifera] (GB:CAO46237.1)	-1.43
AT3G43670	AT3G43670	copper amine oxidase, putative	-1.42
ATDAD1	AT1G32210	ATDAD1 (DEFENDER AGAINST APOPTOTIC DEATH 1)	-1.42
AT4G13860	AT4G13860	glycine-rich RNA-binding protein, putative	-1.42
AT1G31950	AT1G31950	terpene synthase/cyclase family protein	-1.42
MYB50	AT1G57560	AtMYB50 (myb domain protein 50); DNA binding / transcription factor	-1.42
AT4G23740	AT4G23740	leucine-rich repeat transmembrane protein kinase, putative	-1.42
GLP7	AT1G10460	GLP7 (GERMIN-LIKE PROTEIN 7); manganese ion binding / metal ion binding / nutrient reservoir	-1.42
ACP2	AT1G54580	ACP2 (ACYL CARRIER PROTEIN 2)	-1.42
AT1G60160	AT1G60160	potassium transporter family protein	-1.42
AT5G52810	AT5G52810	ornithine cyclodeaminase/mu-crystallin family protein	-1.42
AT5G45580	AT5G45580	transcription factor	-1.42
AT5G62280	AT5G62280	similar to unknown protein [Arabidopsis thaliana] (TAIR:AT2G45360.1); similar to unnamed protein product [Vitis vinifera] (GB:CAO49726.1); contains InterPro domain Protein of unknown function DUF1442 (InterPro:IPR009902)	-1.42
AT4G35060	AT4G35060	heavy-metal-associated domain-containing protein / copper chaperone (CCH)-related	-1.42
IDN2	AT3G48670	XH/XS domain-containing protein / XS zinc finger domain-containing protein	-1.42
AT3G25400	AT3G25400	similar to unnamed protein product [Vitis vinifera] (GB:CAO45250.1); contains InterPro domain NTP pyrophosphohydrolase MazG, putative catalytic core (InterPro:IPR004518); contains InterPro domain NTP Pyrophosphohydrolase MazG-related, RS21-C6 (InterPro:IPR011394); contains InterPro domain EAR (InterPro:IPR009039)	-1.42
RPS5A	AT3G11940	ATRPS5A (RIBOSOMAL PROTEIN 5A); structural constituent of ribosome	-1.42
AT1G47640	AT1G47640	similar to unknown [Populus trichocarpa] (GB:ABK93176.1); contains domain PTHR12869 (PTHR12869)	-1.42
AT1G06100	AT1G06100	fatty acid desaturase family protein	-1.42
SLD5	AT5G49010	SLD5	-1.42
VPS2.2	AT5G44560	[AT5G44560, VPS2.2];[AT5G44562, other RNA]	-1.42
IMK2	AT3G51740	IMK2 (INFLORESCENCE MERISTEM RECEPTOR-LIKE KINASE 2); ATP binding / kinase/ protein serine/threonine kinase	-1.42
AT4G20460	AT4G20460	NAD-dependent epimerase/dehydratase family protein	-1.42
AT4G35905	AT4G35905	similar to unnamed protein product [Vitis vinifera] (GB:CAO43077.1); contains InterPro domain Protein of unknown function DUF343 (InterPro:IPR005651)	-1.42
AT3G51950	AT3G51950	zinc finger (CCCH-type) family protein / RNA recognition motif (RRM)-containing protein	-1.42
AT4G33730	AT4G33730	pathogenesis-related protein, putative	-1.42
AT1G72020	AT1G72020	similar to unknown [Populus trichocarpa] (GB:ABK92617.1)	-1.42
ZIP9	AT4G33020	ZIP9 (ZINC TRANSPORTER 9 PRECURSOR); cation transmembrane transporter	-1.42
AT5G46160	AT5G46160	ribosomal protein L14 family protein / huellenlos paralog (HLP)	-1.41
AT5G20180	AT5G20180	ribosomal protein L36 family protein	-1.41
AIF1	AT3G05800	transcription factor	-1.41
AT4G27860	AT4G27860	integral membrane family protein	-1.41
AT2G47360	AT2G47360	similar to unknown protein [Arabidopsis thaliana] (TAIR:AT1G02570.1); similar to unnamed protein product [Vitis vinifera] (GB:CAO40120.1)	-1.41
NRPB11	AT3G52090	ATRPB13.6 (Arabidopsis thaliana RNA polymerase II 13.6 kDa subunit); DNA binding / DNA-directed RNA polymerase	-1.41
AT5G06630	AT5G06630	proline-rich extensin-like family protein	-1.41
PYRB	AT3G20330	aspartate carabmoyltransferase, chloroplast / aspartate transcarbamylase / ATCase (PYRB)	-1.41
HHP2	AT4G30850	[AT4G30845, similar to unnamed protein product [Vitis vinifera] (GB:CAO66610.1)];[AT4G30850, HHP2 (HEPTAHELICAL TRANSMEMBRANE PROTEIN2)]	-1.41
AT5G08300	AT5G08300	succinyl-CoA ligase (GDP-forming) alpha-chain, mitochondrial, putative / succinyl-CoA synthetase, alpha chain, putative / SCS-alpha, putative	-1.41
AT3G06530	AT3G06530	BAP28-related	-1.41
AT1G69080	AT1G69080	universal stress protein (USP) family protein	-1.41
PK3	AT5G08160	ATPK3 (Arabidopsis thaliana serine/threonine protein kinase 3); kinase	-1.41
WAT1	AT1G75500	nodulin MtN21 family protein	-1.41
AT1G47740	AT1G47740	similar to unknown protein [Arabidopsis thaliana] (TAIR:AT5G25170.1); similar to unnamed protein product [Vitis vinifera] (GB:CAO61202.1); contains InterPro domain Protein of unknown function DUF862, eukaryotic (InterPro:IPR008580)	-1.41
FLA8	AT2G45470	FLA8 (Arabinogalactan protein 8)	-1.41
iqd17	AT4G00820	IQD17 (IQ-domain 17); calmodulin binding	-1.41
AT1G52190	AT1G52190	proton-dependent oligopeptide transport (POT) family protein	-1.41
CYP20-2	AT5G13120	peptidyl-prolyl cis-trans isomerase cyclophilin-type family protein	-1.41
AT1G54950	AT1G54950	similar to unknown protein [Arabidopsis thaliana] (TAIR:AT1G07690.1)	-1.41
AT3G07460	AT3G07460	similar to unknown protein [Arabidopsis thaliana] (TAIR:AT3G07470.1); similar to unnamed protein product [Vitis vinifera] (GB:CAO17046.1); similar to hypothetical protein [Vitis vinifera] (GB:CAN74376.1); contains InterPro domain Protein of unknown function DUF538 (InterPro:IPR007493)	-1.41
LPAT5	AT3G18850	LPAT5; acyltransferase	-1.41
AT5G17630	AT5G17630	glucose-6-phosphate/phosphate translocator, putative	-1.41
AT1G21530	AT1G21530	AMP-binding protein, putative	-1.41
PIP2E	AT2G39010	PIP2;6/PIP2E (plasma membrane intrinsic protein 2;6); water channel	-1.41
AT1G23280	AT1G23280	MAK16 protein-related	-1.41
EXO	AT4G08950	phosphate-responsive protein, putative (EXO)	-1.40
ACLA-2	AT1G60810	ACLA-2 (ATP-citrate lyase A-2)	-1.40
AT3G22850	AT3G22850	similar to unknown protein [Arabidopsis thaliana] (TAIR:AT5G43830.1); similar to hypothetical protein [Vitis vinifera] (GB:CAN71784.1); contains domain PTHR11772 (PTHR11772); contains domain G3DSA:3.60.20.10 (G3DSA:3.60.20.10); contains domain SSF56235 (SSF56235)	-1.40
RD28	AT2G37180	RD28 (plasma membrane intrinsic protein 2;3); water channel	-1.40
AT2G36350	AT2G36350	protein kinase, putative	-1.40
AT5G47190	AT5G47190	ribosomal protein L19 family protein	-1.40
EDA14	AT3G60360	EDA14/UTP11 (EMBRYO SAC DEVELOPMENT ARREST 14)	-1.40
TBL3	AT5G01360	similar to unknown protein [Arabidopsis thaliana] (TAIR:AT3G55990.1); similar to unnamed protein product [Vitis vinifera] (GB:CAO50124.1); contains InterPro domain Protein of unknown function DUF231, plant (InterPro:IPR004253)	-1.40
GAMMA CA3	AT5G66510	GAMMA CA3 (GAMMA CARBONIC ANHYDRASE 3); carbonate dehydratase	-1.40
AT1G18340	AT1G18340	basal transcription factor complex subunit-related	-1.40
AT3G54250	AT3G54250	mevalonate diphosphate decarboxylase, putative	-1.40
OASA1	AT4G14880	OASA1 (O-ACETYLSERINE (THIOL) LYASE (OAS-TL) ISOFORM A1)	-1.40
AT1G47670	AT1G47670	amino acid transporter family protein	-1.40
KCS1	AT1G01120	KCS1 (3-KETOACYL-COA SYNTHASE 1); acyltransferase	-1.40
PDCB1	AT5G61130	glycosyl hydrolase family protein 17	-1.40
AT4G33110	AT4G33110	coclaurine N-methyltransferase, putative	-1.40
AT1G72480	AT1G72480	similar to unknown protein [Arabidopsis thaliana] (TAIR:AT2G01070.1); similar to hypothetical protein [Vitis vinifera] (GB:CAN62240.1); similar to unnamed protein product [Vitis vinifera] (GB:CAO45597.1); contains InterPro domain Transmembrane receptor, eukaryota; (InterPro:IPR009637)	-1.40
AT5G47210	AT5G47210	nuclear RNA-binding protein, putative	-1.40
FLA15	AT3G52370	FLA15 (FASCICLIN-LIKE ARABINOGALACTAN PROTEIN 15 PRECURSOR)	-1.40
AT4G24760	AT4G24760	similar to unknown protein [Arabidopsis thaliana] (TAIR:AT5G14390.1); similar to unnamed protein product [Vitis vinifera] (GB:CAO14651.1); contains domain PTHR12277:SF8 (PTHR12277:SF8); contains domain PTHR12277 (PTHR12277); contains domain SSF53474 (SSF53474); contains domain G3DSA:3.40.50.1820 (G3DSA:3.40.50.1820)	-1.39
ANNAT2	AT5G65020	ANNAT2 (ANNEXIN ARABIDOPSIS 2); calcium ion binding / calcium-dependent phospholipid binding	-1.39
ATP5	AT5G13450	delta subunit of Mt ATP synthase	-1.39
AT4G15930	AT4G15930	dynein light chain, putative	-1.39
AT4G12700	AT4G12700	similar to unknown protein [Arabidopsis thaliana] (TAIR:AT2G04280.1); similar to Os10g0456400 [Oryza sativa (japonica cultivar-group)] (GB:NP_001064754.1); similar to unnamed protein product [Vitis vinifera] (GB:CAO41132.1); similar to unknown [Picea sitchensis] (GB:ABK25405.1)	-1.39
MRP6	AT3G21250	ATMRP6 (Arabidopsis thaliana multidrug resistance-associated protein 6)	-1.39
AT1G12230	AT1G12230	transaldolase, putative	-1.39
AXR4	AT1G54990	AXR4 (AUXIN RESISTANT 4)	-1.39
GLB1	AT4G01900	GLB1 (glutamine synthetase B1)	-1.39
AT3G57030	AT3G57030	strictosidine synthase family protein	-1.39
AT1G29530	AT1G29530	similar to unknown protein [Arabidopsis thaliana] (TAIR:AT2G34310.1); similar to unknown protein [Arabidopsis thaliana] (TAIR:AT2G34310.2); similar to unknown protein [Arabidopsis thaliana] (TAIR:AT2G34310.3)	-1.39
AT3G23530	AT3G23530	cyclopropane fatty acid synthase, putative / CPA-FA synthase, putative	-1.39
AT5G50740	AT5G50740	metal ion binding	-1.39
SCPL27	AT3G07990	SCPL27 (serine carboxypeptidase-like 27); serine carboxypeptidase	-1.39
ACLA-1	AT1G10670	ACLA-1 (ATP-citrate lyase A-1)	-1.39
AT3G11070	AT3G11070	outer membrane OMP85 family protein	-1.39
AT3G10860	AT3G10860	ubiquinol-cytochrome C reductase complex ubiquinone-binding protein, putative / ubiquinol-cytochrome C reductase complex 8.2 kDa protein, putative	-1.39
AT1G44835	AT1G44835	YbaK/prolyl-tRNA synthetase family protein	-1.39
AT1G01830	AT1G01830	armadillo/beta-catenin repeat family protein	-1.39
AT3G17300	AT3G17300	similar to unnamed protein product [Vitis vinifera] (GB:CAO70895.1); contains InterPro domain Complex 1 LYR protein (InterPro:IPR008011)	-1.39
AT5G48460	AT5G48460	fimbrin-like protein, putative	-1.39
AT2G41810	AT2G41810	similar to unknown protein [Arabidopsis thaliana] (TAIR:AT2G41800.1); similar to unnamed protein product [Vitis vinifera] (GB:CAO23583.1); contains InterPro domain Protein of unknown function DUF642 (InterPro:IPR006946); contains InterPro domain Galactose-binding like (InterPro:IPR008979)	-1.39
AT3G24120	AT3G24120	myb family transcription factor	-1.39
SMT1	AT5G13710	SMT1 (STEROL METHYLTRANSFERASE 1)	-1.39
FAMT	AT3G44860	FAMT (FARNESOIC ACID CARBOXYL-O-METHYLTRANSFERASE); S-adenosylmethionine-dependent methyltransferase/ farnesoic acid O-methyltransferase	-1.39
AT5G43400	AT5G43400	similar to unknown protein [Arabidopsis thaliana] (TAIR:AT5G13210.1); similar to unknown protein [Arabidopsis thaliana] (TAIR:AT3G24780.1); similar to unknown protein [Arabidopsis thaliana] (TAIR:AT5G43390.1); similar to hypothetical protein OsI_005960 [Oryza sativa (indica cultivar-group)] (GB:EAY84727.1); similar to unnamed protein product [Vitis vinifera] (GB:CAO70061.1); similar to hypothetic…	-1.39
AT3G45930	AT3G45930	histone H4	-1.39
FEY	AT4G27760	FEY (FOREVER YOUNG); oxidoreductase	-1.38
AT3G16370	AT3G16370	GDSL-motif lipase/hydrolase family protein	-1.38
AT1G50660	AT1G50660	similar to unknown protein [Arabidopsis thaliana] (TAIR:AT3G20350.1); similar to unnamed protein product [Vitis vinifera] (GB:CAO38960.1)	-1.38
AT1G78040	AT1G78040	pollen Ole e 1 allergen and extensin family protein	-1.38
AT1G24320	AT1G24320	alpha-glucosidase, putative	-1.38
AT2G24440	AT2G24440	selenium binding	-1.38
ROPGEF11	AT1G52250	dynein light chain type 1 family protein	-1.38
AT1G51830	AT1G51830	ATP binding / kinase/ protein serine/threonine kinase	-1.38
CSLB02	AT2G32620	ATCSLB02 (Cellulose synthase-like B2); transferase/ transferase, transferring glycosyl groups	-1.38
NACA5	AT1G33040	NACA5 (NASCENT POLYPEPTIDE-ASSOCIATED COMPLEX SUBUNIT ALPHA-LIKE PROTEIN 5)	-1.38
AIR12	AT3G07390	AIR12 (Auxin-Induced in Root cultures 12); extracellular matrix structural constituent	-1.38
AT1G22790	AT1G22790	similar to unknown protein [Arabidopsis thaliana] (TAIR:AT1G34010.1); similar to hypothetical protein OsJ_002345 [Oryza sativa (japonica cultivar-group)] (GB:EAZ12520.1)	-1.38
MYB86	AT5G26660	ATMYB4 (myb domain protein 4); transcription repressor	-1.38
AT2G43110	AT2G43110	similar to unnamed protein product [Vitis vinifera] (GB:CAO45289.1)	-1.38
AT1G58070	AT1G58070	similar to hypothetical protein OsI_024693 [Oryza sativa (indica cultivar-group)] (GB:EAZ03461.1)	-1.38
HAP6	AT4G21150	ribophorin II (RPN2) family protein	-1.38
AT5G18380	AT5G18380	40S ribosomal protein S16 (RPS16C)	-1.38
AT3G19400	AT3G19400	cysteine proteinase, putative	-1.38
AT2G46150	AT2G46150	similar to unknown protein [Arabidopsis thaliana] (TAIR:AT3G54200.1); similar to plant cell wall protein SlTFR88 [Lycopersicon esculentum] (GB:ABF39005.1); contains InterPro domain Harpin-induced 1 (InterPro:IPR010847)	-1.38
ATKDSA2	AT1G16340	ATKDSA2/ATKSDA; 3-deoxy-8-phosphooctulonate synthase	-1.38
AT3G62530	AT3G62530	PBS lyase HEAT-like repeat-containing protein	-1.38
AT3G11500	AT3G11500	small nuclear ribonucleoprotein G, putative / snRNP-G, putative / Sm protein G, putative	-1.38
NIA2	AT1G37130	NIA2 (NITRATE REDUCTASE 2)	-1.38
AT1G03110	AT1G03110	transducin family protein / WD-40 repeat family protein	-1.38
AT1G15120	AT1G15120	ubiquinol-cytochrome C reductase complex 7.8 kDa protein, putative / mitochondrial hinge protein, putative	-1.38
PSL4	AT5G56360	calmodulin-binding protein	-1.38
RTNLB3	AT1G64090	reticulan like protein B3	-1.38
AT1G72170	AT1G72170	similar to unknown protein [Arabidopsis thaliana] (TAIR:AT1G22520.1); similar to unknown [Populus trichocarpa] (GB:ABK94376.1); similar to Os03g0840900 [Oryza sativa (japonica cultivar-group)] (GB:NP_001051850.1); contains InterPro domain Protein of unknown function DUF543 (InterPro:IPR007512)	-1.38
AT3G55420	AT3G55420	similar to hypothetical protein [Vitis vinifera] (GB:CAN83699.1)	-1.38
AT2G27330	AT2G27330	RNA recognition motif (RRM)-containing protein	-1.38
AT5G54980	AT5G54980	integral membrane family protein	-1.38
ADK1	AT5G63400	ADK1 (ADENYLATE KINASE 1); adenylate kinase	-1.37
AT3G14390	AT3G14390	diaminopimelate decarboxylase, putative / DAP carboxylase, putative	-1.37
AT2G28450	AT2G28450	zinc finger (CCCH-type) family protein	-1.37
UGT71B1	AT3G21750	UDP-glucoronosyl/UDP-glucosyl transferase family protein	-1.37
ATLP-1	AT1G18250	ATLP-1 (Arabidopsis thaumatin-like protein 1)	-1.37
AT1G19990	AT1G19990	similar to unknown protein [Arabidopsis thaliana] (TAIR:AT5G11600.1); similar to unknown [Populus trichocarpa] (GB:ABK92449.1)	-1.37
AT4G30670	AT4G30670	contains domain PROKAR_LIPOPROTEIN (PS51257)	-1.37
IRX12	AT2G38080	IRX12/LAC4 (laccase 4); copper ion binding / oxidoreductase	-1.37
FER4	AT2G40300	ATFER4 (FERRITIN 4); ferric iron binding	-1.37
MAP65-1	AT5G55230	ATMAP65-1 (MICROTUBULE-ASSOCIATED PROTEINS 65-1); microtubule binding	-1.37
AT5G46710	AT5G46710	zinc-binding family protein	-1.37
WOL	AT2G01830	WOL (WOODEN LEG)	-1.37
AT2G40010	AT2G40010	[AT2G40010, 60S acidic ribosomal protein P0 (RPP0A)];[AT2G40008, other RNA]	-1.37
PAP29	AT5G63140	ATPAP29/PAP29 (purple acid phosphatase 29); acid phosphatase/ protein serine/threonine phosphatase	-1.37
STT3B	AT1G34130	STT3B (STAUROSPORIN AND TEMPERATURE SENSITIVE 3-LIKE B); oligosaccharyl transferase	-1.37
AT3G43720	AT3G43720	protease inhibitor/seed storage/lipid transfer protein (LTP) family protein	-1.37
AT2G35810	AT2G35810	similar to unknown protein [Arabidopsis thaliana] (TAIR:AT2G35830.1); similar to unnamed protein product [Vitis vinifera] (GB:CAO69007.1)	-1.37
HPA1	AT5G10330	[AT1G71920, histidinol-phosphate aminotransferase, putative];[AT5G10330, EMB2196/HISN6A/HPA1 (EMBRYO DEFECTIVE 2196); histidinol-phosphate transaminase]	-1.37
SAG24	AT1G66580	60S ribosomal protein L10 (RPL10C)	-1.37
AT5G55550	AT5G55550	RNA recognition motif (RRM)-containing protein	-1.37
AT3G23620	AT3G23620	brix domain-containing protein	-1.37
ATMAP65-6	AT2G01910	ATMAP65-6; microtubule binding	-1.37
AT3G07480	AT3G07480	electron carrier/ iron-sulfur cluster binding	-1.37
AT4G38220	AT4G38220	aminoacylase, putative / N-acyl-L-amino-acid amidohydrolase, putative	-1.37
RNS3	AT1G26820	RNS3 (RIBONUCLEASE 3); endoribonuclease	-1.37
LGT8	AT1G70090	GATL9/LGT8 (Galacturonosyltransferase-like 9); polygalacturonate 4-alpha-galacturonosyltransferase/ transferase, transferring glycosyl groups / transferase, transferring hexosyl groups	-1.37
AT1G21560	AT1G21560	similar to unknown protein [Arabidopsis thaliana] (TAIR:AT4G01170.1); similar to hypothetical protein OsI_014365 [Oryza sativa (indica cultivar-group)] (GB:EAY93132.1); similar to Os04g0221000 [Oryza sativa (japonica cultivar-group)] (GB:NP_001052267.1)	-1.37
ACHT5	AT5G61440	thioredoxin family protein	-1.37
RPS18C	AT4G09800	RPS18C (S18 RIBOSOMAL PROTEIN); structural constituent of ribosome	-1.36
KRP2	AT3G50630	ICK2/KRP2 (KIP-RELATED PROTEIN 2); cyclin-dependent protein kinase inhibitor/ kinase inhibitor/ protein binding	-1.36
PWP2	AT1G15440	transducin family protein / WD-40 repeat family protein	-1.36
IQD3	AT3G52290	IQD3 (IQ-domain 3); calmodulin binding	-1.36
AT5G66310	AT5G66310	kinesin motor family protein	-1.36
AT2G39440	AT2G39440	similar to unknown [Populus trichocarpa] (GB:ABK92865.1); contains InterPro domain Ribonuclease H1 small subunit (InterPro:IPR013924)	-1.36
AT3G12830	AT3G12830	auxin-responsive family protein	-1.36
DFL1	AT5G54510	DFL1/GH3.6 (DWARF IN LIGHT 1); indole-3-acetic acid amido synthetase	-1.36
AT1G13930	AT1G13930	similar to nodulin-related [Arabidopsis thaliana] (TAIR:AT2G03440.1); similar to hypothetical protein [Vitis vinifera] (GB:CAN63832.1)	-1.36
AT2G20140	AT2G20140	26S protease regulatory complex subunit 4, putative	-1.36
PDIL1-6	AT3G16110	ATPDIL1-6 (PDI-LIKE 1-6); thiol-disulfide exchange intermediate	-1.36
AT1G69420	AT1G69420	zinc finger (DHHC type) family protein	-1.36
AT2G37585	AT2G37585	glycosyltransferase family 14 protein / core-2/I-branching enzyme family protein	-1.36
AT4G32330	AT4G32330	similar to unknown protein [Arabidopsis thaliana] (TAIR:AT2G25480.1); similar to unknown [Populus trichocarpa] (GB:ABK95344.1); contains InterPro domain Targeting for Xklp2 (InterPro:IPR009675)	-1.36
AT1G23460	AT1G23460	polygalacturonase	-1.36
AT3G09330	AT3G09330	[AT3G09340, amino acid transporter family protein];[AT3G09330, amino acid transporter family protein]	-1.36
CYP72C1	AT1G17060	CYP72C1 (cytochrome P450, family 72, subfamily C, polypeptide 1); oxygen binding	-1.36
AT2G22610	AT2G22610	kinesin motor protein-related	-1.36
AT5G60940	AT5G60940	transducin family protein / WD-40 repeat family protein	-1.36
TRX3	AT5G42980	ATTRX3 (thioredoxin H-type 3); thiol-disulfide exchange intermediate	-1.36
AT1G24160	AT1G24160	similar to unknown protein [Arabidopsis thaliana] (TAIR:AT1G70100.3); similar to unnamed protein product [Vitis vinifera] (GB:CAO40971.1)	-1.36
FLR1	AT3G12145	FLR1 (FLOR1); enzyme inhibitor	-1.36
AT3G06140	AT3G06140	zinc finger (C3HC4-type RING finger) family protein	-1.36
AT1G77580	AT1G77580	myosin heavy chain-related	-1.36
AT1G02870	AT1G02870	similar to unnamed protein product [Vitis vinifera] (GB:CAO39998.1); contains domain PD099709 (PD099709)	-1.36
AT3G05000	AT3G05000	transport protein particle (TRAPP) component Bet3 family protein	-1.36
AT1G26940	AT1G26940	peptidyl-prolyl cis-trans isomerase cyclophilin-type family protein	-1.36
AT2G43480	AT2G43480	peroxidase, putative	-1.36
AT1G30845	AT1G30845	similar to unnamed protein product [Vitis vinifera] (GB:CAO61037.1); contains domain Multidrug resistance efflux transporter EmrE (SSF103481)	-1.36
CYB-1	AT5G38630	ACYB-1 (Arabidopsis cytochrome b561 -1); carbon-monoxide oxygenase	-1.36
AT5G19730	AT5G19730	pectinesterase family protein	-1.36
AT4G25740	AT4G25740	40S ribosomal protein S10 (RPS10A)	-1.36
mtACP3	AT5G47630	MTACP3 (MITOCHONDRIAL ACYL CARRIER PROTEIN 3); acyl carrier	-1.36
AT5G48310	AT5G48310	similar to unknown protein [Arabidopsis thaliana] (TAIR:AT4G24610.1); similar to unknown protein [Arabidopsis thaliana] (TAIR:AT5G65440.1); similar to predicted protein [Physcomitrella patens subsp. patens] (GB:EDQ82245.1); similar to predicted protein [Physcomitrella patens subsp. patens] (GB:EDQ70121.1); similar to unnamed protein product [Vitis vinifera] (GB:CAO41110.1); contains InterPro doma…	-1.36
RSH4	AT1G30850	similar to unknown protein [Arabidopsis thaliana] (TAIR:AT2G34910.1); similar to unnamed protein product [Vitis vinifera] (GB:CAO15288.1)	-1.36
AT1G72200	AT1G72200	zinc finger (C3HC4-type RING finger) family protein	-1.36
WAG2	AT3G14370	WAG2; kinase	-1.36
TOM22-V	AT5G43970	TOM22-V (TRANSLOCASE OUTER MITOCHONDRIAL MEMBRANE 22-V)	-1.36
LOS1	AT1G56070	LOS1 (Low expression of osmotically responsive genes 1); translation elongation factor/ translation factor, nucleic acid binding	-1.35
[truncated: 1,243 more rows]
